# Supplementary material
Source: ML conference proceedings conference paper supplement (https://openreview.net/forum?id=MyotJECv0D)

A Appendices (Supplementary Material)

1. Pearson Correlation Coefficient (XZho)

|         |         |         |         |         |         |         |         |         |         |         |         |                                                                                       |
|---------|---------|---------|---------|---------|---------|---------|---------|---------|---------|---------|---------|---------------------------------------------------------------------------------------|
| AraZho  | Distil  | MiniLM  | Mpnet   | Roberta | Leven   | Jaccard | Dice    | Cosine  | TER     | CHRF    | BLEU    | 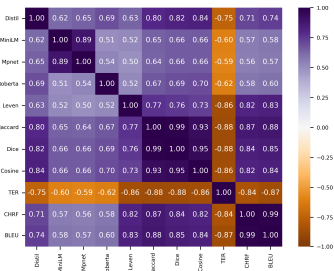   |
| Distil  | 1.0000  | 0.6197  | 0.6452  | 0.6906  | 0.6347  | 0.8029  | 0.8217  | 0.8359  | -0.7474 | 0.7149  | 0.7361  |                                                                                       |
| MiniLM  | 0.6197  | 1.0000  | 0.8884  | 0.5053  | 0.5167  | 0.6475  | 0.6620  | 0.6597  | -0.6020 | 0.5652  | 0.5818  |                                                                                       |
| Mpnet   | 0.6452  | 0.8884  | 1.0000  | 0.5371  | 0.4976  | 0.6405  | 0.6605  | 0.6638  | -0.5909 | 0.5574  | 0.5750  |                                                                                       |
| Roberta | 0.6906  | 0.5053  | 0.5371  | 1.0000  | 0.5214  | 0.6683  | 0.6880  | 0.6995  | -0.6164 | 0.5825  | 0.6007  |                                                                                       |
| Leven   | 0.6347  | 0.5167  | 0.4976  | 0.5214  | 1.0000  | 0.7725  | 0.7565  | 0.7313  | -0.8639 | 0.8197  | 0.8302  |                                                                                       |
| Jaccard | 0.8029  | 0.6475  | 0.6405  | 0.6683  | 0.7725  | 1.0000  | 0.9875  | 0.9331  | -0.8800 | 0.8700  | 0.8822  |                                                                                       |
| Dice    | 0.8217  | 0.6620  | 0.6605  | 0.6880  | 0.7565  | 0.9875  | 1.0000  | 0.9514  | -0.8771 | 0.8370  | 0.8548  |                                                                                       |
| Cosine  | 0.8359  | 0.6597  | 0.6638  | 0.6995  | 0.7313  | 0.9331  | 0.9514  | 1.0000  | -0.8596 | 0.8237  | 0.8419  |                                                                                       |
| TER     | -0.7474 | -0.6020 | -0.5909 | -0.6164 | -0.8639 | -0.8800 | -0.8771 | -0.8596 | 1.0000  | -0.8353 | -0.8702 |                                                                                       |
| CHRF    | 0.7149  | 0.5652  | 0.5574  | 0.5825  | 0.8197  | 0.8700  | 0.8370  | 0.8237  | -0.8353 | 1.0000  | 0.9861  |                                                                                       |
| BLEU    | 0.7361  | 0.5818  | 0.5750  | 0.6007  | 0.8302  | 0.8822  | 0.8548  | 0.8419  | -0.8702 | 0.9861  | 1.0000  |                                                                                       |
| CesZho  | Distil  | MiniLM  | Mpnet   | Roberta | Leven   | Jaccard | Dice    | Cosine  | TER     | CHRF    | BLEU    |    |
| Distil  | 1.0000  | 0.6155  | 0.6355  | 0.6925  | 0.6512  | 0.8112  | 0.8280  | 0.8408  | -0.7580 | 0.7251  | 0.7466  |                                                                                       |
| MiniLM  | 0.6155  | 1.0000  | 0.8941  | 0.5022  | 0.5201  | 0.6415  | 0.6541  | 0.6501  | -0.6008 | 0.5653  | 0.5824  |                                                                                       |
| Mpnet   | 0.6355  | 0.8941  | 1.0000  | 0.5285  | 0.4987  | 0.6322  | 0.6495  | 0.6509  | -0.5865 | 0.5562  | 0.5744  |                                                                                       |
| Roberta | 0.6925  | 0.5022  | 0.5285  | 1.0000  | 0.5438  | 0.6789  | 0.6960  | 0.7066  | -0.6314 | 0.5984  | 0.6167  |                                                                                       |
| Leven   | 0.6512  | 0.5201  | 0.4987  | 0.5438  | 1.0000  | 0.7822  | 0.7672  | 0.7442  | -0.8706 | 0.8244  | 0.8359  |                                                                                       |
| Jaccard | 0.8112  | 0.6415  | 0.6322  | 0.6789  | 0.7822  | 1.0000  | 0.9880  | 0.9358  | -0.8819 | 0.8720  | 0.8837  |                                                                                       |
| Dice    | 0.8280  | 0.6541  | 0.6495  | 0.6960  | 0.7672  | 0.9880  | 1.0000  | 0.9527  | -0.8792 | 0.8387  | 0.8567  |                                                                                       |
| Cosine  | 0.8408  | 0.6501  | 0.6509  | 0.7066  | 0.7442  | 0.9358  | 0.9527  | 1.0000  | -0.8656 | 0.8257  | 0.8446  |                                                                                       |
| TER     | -0.7580 | -0.6008 | -0.5865 | -0.6314 | -0.8706 | -0.8819 | -0.8792 | -0.8656 | 1.0000  | -0.8393 | -0.8721 |                                                                                       |
| CHRF    | 0.7251  | 0.5653  | 0.5562  | 0.5984  | 0.8244  | 0.8720  | 0.8387  | 0.8257  | -0.8393 | 1.0000  | 0.9864  |                                                                                       |
| BLEU    | 0.7466  | 0.5824  | 0.5744  | 0.6167  | 0.8359  | 0.8837  | 0.8567  | 0.8446  | -0.8721 | 0.9864  | 1.0000  |                                                                                       |
| EngZho  | Distil  | MiniLM  | Mpnet   | Roberta | Leven   | Jaccard | Dice    | Cosine  | TER     | CHRF    | BLEU    |   |
| Distil  | 1.0000  | 0.6095  | 0.6564  | 0.6462  | 0.5927  | 0.7240  | 0.7371  | 0.7546  | -0.6960 | 0.6233  | 0.6487  |                                                                                       |
| MiniLM  | 0.6095  | 1.0000  | 0.8909  | 0.5180  | 0.5303  | 0.6455  | 0.6581  | 0.6516  | -0.6063 | 0.5584  | 0.5787  |                                                                                       |
| Mpnet   | 0.6564  | 0.8909  | 1.0000  | 0.5418  | 0.5093  | 0.6327  | 0.6492  | 0.6465  | -0.5971 | 0.5417  | 0.5638  |                                                                                       |
| Roberta | 0.6462  | 0.5180  | 0.5418  | 1.0000  | 0.5402  | 0.6730  | 0.6904  | 0.6976  | -0.6319 | 0.5789  | 0.6013  |                                                                                       |
| Leven   | 0.5927  | 0.5303  | 0.5093  | 0.5402  | 1.0000  | 0.7818  | 0.7689  | 0.7424  | -0.8526 | 0.8134  | 0.8292  |                                                                                       |
| Jaccard | 0.7240  | 0.6455  | 0.6327  | 0.6730  | 0.7818  | 1.0000  | 0.9875  | 0.9271  | -0.8700 | 0.8649  | 0.8803  |                                                                                       |
| Dice    | 0.7371  | 0.6581  | 0.6492  | 0.6904  | 0.7689  | 0.9875  | 1.0000  | 0.9444  | -0.8729 | 0.8313  | 0.8528  |                                                                                       |
| Cosine  | 0.7546  | 0.6516  | 0.6465  | 0.6976  | 0.7424  | 0.9271  | 0.9444  | 1.0000  | -0.8510 | 0.8199  | 0.8406  |                                                                                       |
| TER     | -0.6960 | -0.6063 | -0.5971 | -0.6319 | -0.8526 | -0.8700 | -0.8729 | -0.8510 | 1.0000  | -0.8072 | -0.8505 |                                                                                       |
| CHRF    | 0.6233  | 0.5584  | 0.5417  | 0.5789  | 0.8134  | 0.8649  | 0.8313  | 0.8199  | -0.8072 | 1.0000  | 0.9846  |                                                                                       |
| BLEU    | 0.6487  | 0.5787  | 0.5638  | 0.6013  | 0.8292  | 0.8803  | 0.8528  | 0.8406  | -0.8505 | 0.9846  | 1.0000  |                                                                                       |
| FilZho  | Distil  | MiniLM  | Mpnet   | Roberta | Leven   | Jaccard | Dice    | Cosine  | TER     | CHRF    | BLEU    |  |
| Distil  | 1.0000  | 0.6144  | 0.6346  | 0.6826  | 0.6432  | 0.8054  | 0.8220  | 0.8354  | -0.7456 | 0.7225  | 0.7445  |                                                                                       |
| MiniLM  | 0.6144  | 1.0000  | 0.8891  | 0.4983  | 0.5150  | 0.6390  | 0.6518  | 0.6489  | -0.5920 | 0.5647  | 0.5822  |                                                                                       |
| Mpnet   | 0.6346  | 0.8891  | 1.0000  | 0.5226  | 0.4960  | 0.6309  | 0.6485  | 0.6503  | -0.5809 | 0.5561  | 0.5747  |                                                                                       |
| Roberta | 0.6826  | 0.4983  | 0.5226  | 1.0000  | 0.5284  | 0.6690  | 0.6847  | 0.6946  | -0.6113 | 0.5895  | 0.6084  |                                                                                       |
| Leven   | 0.6432  | 0.5150  | 0.4960  | 0.5284  | 1.0000  | 0.7732  | 0.7596  | 0.7390  | -0.8592 | 0.8198  | 0.8307  |                                                                                       |
| Jaccard | 0.8054  | 0.6390  | 0.6309  | 0.6690  | 0.7732  | 1.0000  | 0.9885  | 0.9329  | -0.8715 | 0.8709  | 0.8837  |                                                                                       |
| Dice    | 0.8220  | 0.6518  | 0.6485  | 0.6847  | 0.7596  | 0.9885  | 1.0000  | 0.9488  | -0.8695 | 0.8400  | 0.8589  |                                                                                       |
| Cosine  | 0.8354  | 0.6489  | 0.6503  | 0.6946  | 0.7390  | 0.9329  | 0.9488  | 1.0000  | -0.8566 | 0.8284  | 0.8481  |                                                                                       |
| TER     | -0.7456 | -0.5920 | -0.5809 | -0.6113 | -0.8592 | -0.8715 | -0.8695 | -0.8566 | 1.0000  | -0.8310 | -0.8656 |                                                                                       |
| CHRF    | 0.7225  | 0.5647  | 0.5561  | 0.5895  | 0.8198  | 0.8709  | 0.8400  | 0.8284  | -0.8310 | 1.0000  | 0.9861  |                                                                                       |
| BLEU    | 0.7445  | 0.5822  | 0.5747  | 0.6084  | 0.8307  | 0.8837  | 0.8589  | 0.8481  | -0.8656 | 0.9861  | 1.0000  |                                                                                       |
| FraZho  | Distil  | MiniLM  | Mpnet   | Roberta | Leven   | Jaccard | Dice    | Cosine  | TER     | CHRF    | BLEU    |  |
| Distil  | 1.0000  | 0.5842  | 0.6370  | 0.6272  | 0.5557  | 0.7022  | 0.7183  | 0.7373  | -0.6546 | 0.6209  | 0.6405  |                                                                                       |
| MiniLM  | 0.5842  | 1.0000  | 0.8677  | 0.4813  | 0.4982  | 0.6278  | 0.6415  | 0.6406  | -0.5760 | 0.5511  | 0.5679  |                                                                                       |
| Mpnet   | 0.6370  | 0.8677  | 1.0000  | 0.5197  | 0.4714  | 0.6132  | 0.6341  | 0.6417  | -0.5585 | 0.5347  | 0.5521  |                                                                                       |
| Roberta | 0.6272  | 0.4813  | 0.5197  | 1.0000  | 0.4687  | 0.6282  | 0.6512  | 0.6653  | -0.5596 | 0.5435  | 0.5597  |                                                                                       |
| Leven   | 0.5557  | 0.4982  | 0.4714  | 0.4687  | 1.0000  | 0.7664  | 0.7490  | 0.7189  | -0.8475 | 0.8041  | 0.8142  |                                                                                       |
| Jaccard | 0.7022  | 0.6278  | 0.6132  | 0.6282  | 0.7664  | 1.0000  | 0.9873  | 0.9260  | -0.8629 | 0.8704  | 0.8818  |                                                                                       |
| Dice    | 0.7183  | 0.6415  | 0.6341  | 0.6512  | 0.7490  | 0.9873  | 1.0000  | 0.9454  | -0.8581 | 0.8386  | 0.8551  |                                                                                       |
| Cosine  | 0.7373  | 0.6406  | 0.6417  | 0.6653  | 0.7189  | 0.9260  | 0.9454  | 1.0000  | -0.8336 | 0.8257  | 0.8426  |                                                                                       |
| TER     | -0.6546 | -0.5760 | -0.5585 | -0.5596 | -0.8475 | -0.8629 | -0.8581 | -0.8336 | 1.0000  | -0.8127 | -0.8539 |                                                                                       |
| CHRF    | 0.6209  | 0.5511  | 0.5347  | 0.5435  | 0.8041  | 0.8704  | 0.8386  | 0.8257  | -0.8127 | 1.0000  | 0.9848  |                                                                                       |
| BLEU    | 0.6405  | 0.5679  | 0.5521  | 0.5597  | 0.8142  | 0.8818  | 0.8551  | 0.8426  | -0.8539 | 0.9848  | 1.0000  |                                                                                       |
| IndZho  | Distil  | MiniLM  | Mpnet   | Roberta | Leven   | Jaccard | Dice    | Cosine  | TER     | CHRF    | BLEU    |  |
| Distil  | 1.0000  | 0.6376  | 0.6516  | 0.7225  | 0.6856  | 0.8316  | 0.8495  | 0.8603  | -0.7886 | 0.7400  | 0.7640  |                                                                                       |
| MiniLM  | 0.6376  | 1.0000  | 0.9011  | 0.5325  | 0.5517  | 0.6609  | 0.6741  | 0.6708  | -0.6292 | 0.5833  | 0.6024  |                                                                                       |
| Mpnet   | 0.6516  | 0.9011  | 1.0000  | 0.5522  | 0.5307  | 0.6495  | 0.6680  | 0.6694  | -0.6148 | 0.5699  | 0.5903  |                                                                                       |
| Roberta | 0.7225  | 0.5325  | 0.5522  | 1.0000  | 0.5886  | 0.7124  | 0.7307  | 0.7385  | -0.6745 | 0.6255  | 0.6469  |                                                                                       |
| Leven   | 0.6856  | 0.5517  | 0.5307  | 0.5886  | 1.0000  | 0.8092  | 0.7943  | 0.7751  | -0.8955 | 0.8546  | 0.8669  |                                                                                       |
| Jaccard | 0.8316  | 0.6609  | 0.6495  | 0.7124  | 0.8092  | 1.0000  | 0.9873  | 0.9438  | -0.9081 | 0.8813  | 0.8962  |                                                                                       |
| Dice    | 0.8495  | 0.6741  | 0.6680  | 0.7307  | 0.7943  | 0.9873  | 1.0000  | 0.9616  | -0.9041 | 0.8465  | 0.8681  |                                                                                       |
| Cosine  | 0.8603  | 0.6708  | 0.6694  | 0.7385  | 0.7751  | 0.9438  | 0.9616  | 1.0000  | -0.8914 | 0.8343  | 0.8569  |                                                                                       |
| TER     | -0.7886 | -0.6292 | -0.6148 | -0.6745 | -0.8955 | -0.9081 | -0.9041 | -0.8914 | 1.0000  | -0.8682 | -0.9012 |                                                                                       |
| CHRF    | 0.7400  | 0.5833  | 0.5699  | 0.6255  | 0.8546  | 0.8813  | 0.8465  | 0.8343  | -0.8682 | 1.0000  | 0.9870  |                                                                                       |
| BLEU    | 0.7640  | 0.6024  | 0.5903  | 0.6469  | 0.8669  | 0.8962  | 0.8681  | 0.8569  | -0.9012 | 0.9870  | 1.0000  |                                                                                       |

| ItaZho  | Distil  | MiniLM  | Mpnet   | Roberta | Leven   | Jaccard | Dice    | Cosine  | TER     | CHRF    | BLEU    |
|---------|---------|---------|---------|---------|---------|---------|---------|---------|---------|---------|---------|
| Distil  | 1.0000  | 0.6453  | 0.6626  | 0.7226  | 0.6810  | 0.8314  | 0.8505  | 0.8608  | -0.7700 | 0.7390  | 0.7593  |
| MiniLM  | 0.6453  | 1.0000  | 0.9037  | 0.5383  | 0.5567  | 0.6686  | 0.6834  | 0.6801  | -0.6220 | 0.5862  | 0.6025  |
| Mpnet   | 0.6626  | 0.9037  | 1.0000  | 0.5625  | 0.5376  | 0.6609  | 0.6803  | 0.6815  | -0.6118 | 0.5777  | 0.5952  |
| Roberta | 0.7226  | 0.5383  | 0.5625  | 1.0000  | 0.5760  | 0.7074  | 0.7272  | 0.7380  | -0.6514 | 0.6193  | 0.6365  |
| Leven   | 0.6810  | 0.5567  | 0.5376  | 0.5760  | 1.0000  | 0.8049  | 0.7898  | 0.7694  | -0.8672 | 0.8397  | 0.8513  |
| Jaccard | 0.8314  | 0.6686  | 0.6609  | 0.7074  | 0.8049  | 1.0000  | 0.9865  | 0.9415  | -0.8790 | 0.8792  | 0.8907  |
| Dice    | 0.8505  | 0.6834  | 0.6803  | 0.7272  | 0.7898  | 0.9865  | 1.0000  | 0.9606  | -0.8772 | 0.8419  | 0.8588  |
| Cosine  | 0.8608  | 0.6801  | 0.6815  | 0.7380  | 0.7694  | 0.9415  | 0.9606  | 1.0000  | -0.8664 | 0.8294  | 0.8469  |
| TER     | -0.7700 | -0.6220 | -0.6118 | -0.6514 | -0.8672 | -0.8790 | -0.8772 | -0.8664 | 1.0000  | -0.8307 | -0.8636 |
| CHRF    | 0.7390  | 0.5862  | 0.5777  | 0.6193  | 0.8397  | 0.8792  | 0.8419  | 0.8294  | -0.8307 | 1.0000  | 0.9870  |
| BLEU    | 0.7593  | 0.6025  | 0.5952  | 0.6365  | 0.8513  | 0.8907  | 0.8588  | 0.8469  | -0.8636 | 0.9870  | 1.0000  |

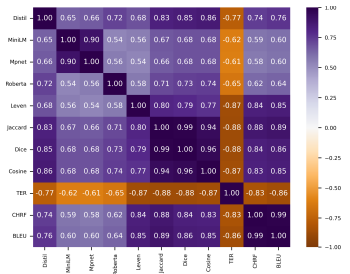

| KazZho  | Distil  | MiniLM  | Mpnet   | Roberta | Leven   | Jaccard | Dice    | Cosine  | TER     | CHRF    | BLEU    |
|---------|---------|---------|---------|---------|---------|---------|---------|---------|---------|---------|---------|
| Distil  | 1.0000  | 0.6081  | 0.6267  | 0.6624  | 0.6180  | 0.7974  | 0.8137  | 0.8259  | -0.7324 | 0.7151  | 0.7322  |
| MiniLM  | 0.6081  | 1.0000  | 0.8842  | 0.4747  | 0.5007  | 0.6339  | 0.6470  | 0.6408  | -0.5825 | 0.5601  | 0.5741  |
| Mpnet   | 0.6267  | 0.8842  | 1.0000  | 0.5040  | 0.4729  | 0.6227  | 0.6401  | 0.6400  | -0.5636 | 0.5489  | 0.5633  |
| Roberta | 0.6624  | 0.4747  | 0.5040  | 1.0000  | 0.4838  | 0.6417  | 0.6575  | 0.6668  | -0.5788 | 0.5659  | 0.5788  |
| Leven   | 0.6180  | 0.5007  | 0.4729  | 0.4838  | 1.0000  | 0.7627  | 0.7438  | 0.7151  | -0.8596 | 0.8042  | 0.8127  |
| Jaccard | 0.7974  | 0.6339  | 0.6227  | 0.6417  | 0.7627  | 1.0000  | 0.9882  | 0.9292  | -0.8700 | 0.8713  | 0.8797  |
| Dice    | 0.8137  | 0.6470  | 0.6401  | 0.6575  | 0.7438  | 0.9882  | 1.0000  | 0.9451  | -0.8633 | 0.8374  | 0.8513  |
| Cosine  | 0.8259  | 0.6408  | 0.6400  | 0.6668  | 0.7151  | 0.9292  | 0.9451  | 1.0000  | -0.8423 | 0.8222  | 0.8354  |
| TER     | -0.7324 | -0.5825 | -0.5636 | -0.5788 | -0.8596 | -0.8700 | -0.8633 | -0.8423 | 1.0000  | -0.8293 | -0.8611 |
| CHRF    | 0.7151  | 0.5601  | 0.5489  | 0.5659  | 0.8042  | 0.8713  | 0.8374  | 0.8222  | -0.8293 | 1.0000  | 0.9862  |
| BLEU    | 0.7322  | 0.5741  | 0.5633  | 0.5788  | 0.8127  | 0.8797  | 0.8513  | 0.8354  | -0.8611 | 0.9862  | 1.0000  |

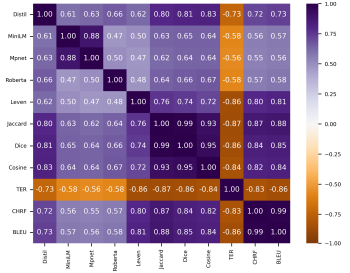

| KhmZho  | Distil  | MiniLM  | Mpnet   | Roberta | Leven   | Jaccard | Dice    | Cosine  | TER     | CHRF    | BLEU    |
|---------|---------|---------|---------|---------|---------|---------|---------|---------|---------|---------|---------|
| Distil  | 1.0000  | 0.5833  | 0.6030  | 0.6478  | 0.6213  | 0.7907  | 0.8060  | 0.8223  | -0.7366 | 0.7026  | 0.7195  |
| MiniLM  | 0.5833  | 1.0000  | 0.8796  | 0.4620  | 0.4924  | 0.6187  | 0.6307  | 0.6254  | -0.5694 | 0.5436  | 0.5557  |
| Mpnet   | 0.6030  | 0.8796  | 1.0000  | 0.4922  | 0.4702  | 0.6101  | 0.6258  | 0.6265  | -0.5551 | 0.5313  | 0.5445  |
| Roberta | 0.6478  | 0.4620  | 0.4922  | 1.0000  | 0.4955  | 0.6431  | 0.6597  | 0.6736  | -0.5905 | 0.5563  | 0.5706  |
| Leven   | 0.6213  | 0.4924  | 0.4702  | 0.4955  | 1.0000  | 0.7646  | 0.7487  | 0.7220  | -0.8672 | 0.8168  | 0.8263  |
| Jaccard | 0.7907  | 0.6187  | 0.6101  | 0.6431  | 0.7646  | 1.0000  | 0.9889  | 0.9262  | -0.8725 | 0.8614  | 0.8685  |
| Dice    | 0.8060  | 0.6307  | 0.6258  | 0.6597  | 0.7487  | 0.9889  | 1.0000  | 0.9418  | -0.8677 | 0.8314  | 0.8435  |
| Cosine  | 0.8223  | 0.6254  | 0.6265  | 0.6736  | 0.7220  | 0.9262  | 0.9418  | 1.0000  | -0.8482 | 0.8117  | 0.8239  |
| TER     | -0.7366 | -0.5694 | -0.5551 | -0.5905 | -0.8672 | -0.8725 | -0.8677 | -0.8482 | 1.0000  | -0.8346 | -0.8669 |
| CHRF    | 0.7026  | 0.5436  | 0.5313  | 0.5563  | 0.8168  | 0.8614  | 0.8314  | 0.8117  | -0.8346 | 1.0000  | 0.9853  |
| BLEU    | 0.7195  | 0.5557  | 0.5445  | 0.5706  | 0.8263  | 0.8685  | 0.8435  | 0.8239  | -0.8669 | 0.9853  | 1.0000  |

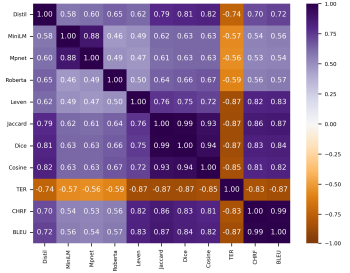

| KirZho  | Distil  | MiniLM  | Mpnet   | Roberta | Leven   | Jaccard | Dice    | Cosine  | TER     | CHRF    | BLEU    |
|---------|---------|---------|---------|---------|---------|---------|---------|---------|---------|---------|---------|
| Distil  | 1.0000  | 0.6013  | 0.6221  | 0.6520  | 0.6132  | 0.7895  | 0.8057  | 0.8187  | -0.7135 | 0.7085  | 0.7234  |
| MiniLM  | 0.6013  | 1.0000  | 0.8802  | 0.4606  | 0.5050  | 0.6324  | 0.6454  | 0.6378  | -0.5752 | 0.5577  | 0.5702  |
| Mpnet   | 0.6221  | 0.8802  | 1.0000  | 0.4908  | 0.4761  | 0.6217  | 0.6389  | 0.6368  | -0.5540 | 0.5463  | 0.5588  |
| Roberta | 0.6520  | 0.4606  | 0.4908  | 1.0000  | 0.4692  | 0.6262  | 0.6425  | 0.6534  | -0.5548 | 0.5510  | 0.5604  |
| Leven   | 0.6132  | 0.5050  | 0.4761  | 0.4692  | 1.0000  | 0.7708  | 0.7493  | 0.7171  | -0.8541 | 0.8055  | 0.8141  |
| Jaccard | 0.7895  | 0.6324  | 0.6217  | 0.6262  | 0.7708  | 1.0000  | 0.9877  | 0.9264  | -0.8587 | 0.8726  | 0.8791  |
| Dice    | 0.8057  | 0.6454  | 0.6389  | 0.6425  | 0.7493  | 0.9877  | 1.0000  | 0.9428  | -0.8510 | 0.8377  | 0.8490  |
| Cosine  | 0.8187  | 0.6378  | 0.6368  | 0.6534  | 0.7171  | 0.9264  | 0.9428  | 1.0000  | -0.8299 | 0.8198  | 0.8298  |
| TER     | -0.7135 | -0.5752 | -0.5540 | -0.5548 | -0.8541 | -0.8587 | -0.8510 | -0.8299 | 1.0000  | -0.8148 | -0.8474 |
| CHRF    | 0.7085  | 0.5577  | 0.5463  | 0.5510  | 0.8055  | 0.8726  | 0.8377  | 0.8198  | -0.8148 | 1.0000  | 0.9859  |
| BLEU    | 0.7234  | 0.5702  | 0.5588  | 0.5604  | 0.8141  | 0.8791  | 0.8490  | 0.8298  | -0.8474 | 0.9859  | 1.0000  |

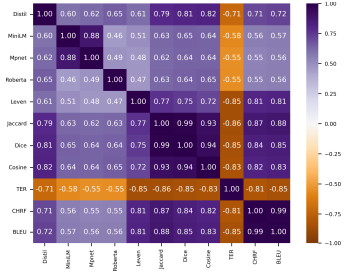

| LaoZho  | Distil  | MiniLM  | Mpnet   | Roberta | Leven   | Jaccard | Dice    | Cosine  | TER     | CHRF    | BLEU    |
|---------|---------|---------|---------|---------|---------|---------|---------|---------|---------|---------|---------|
| Distil  | 1.0000  | 0.5741  | 0.5950  | 0.6186  | 0.6195  | 0.7757  | 0.7892  | 0.8015  | -0.7138 | 0.6922  | 0.7055  |
| MiniLM  | 0.5741  | 1.0000  | 0.8721  | 0.4297  | 0.4994  | 0.6121  | 0.6232  | 0.6126  | -0.5602 | 0.5387  | 0.5491  |
| Mpnet   | 0.5950  | 0.8721  | 1.0000  | 0.4667  | 0.4674  | 0.5965  | 0.6111  | 0.6085  | -0.5393 | 0.5216  | 0.5317  |
| Roberta | 0.6186  | 0.4297  | 0.4667  | 1.0000  | 0.4661  | 0.6057  | 0.6205  | 0.6394  | -0.5483 | 0.5283  | 0.5348  |
| Leven   | 0.6195  | 0.4994  | 0.4674  | 0.4661  | 1.0000  | 0.7862  | 0.7700  | 0.7312  | -0.8704 | 0.8230  | 0.8350  |
| Jaccard | 0.7757  | 0.6121  | 0.5965  | 0.6057  | 0.7862  | 1.0000  | 0.9890  | 0.9142  | -0.8662 | 0.8638  | 0.8691  |
| Dice    | 0.7892  | 0.6232  | 0.6111  | 0.6205  | 0.7700  | 0.9890  | 1.0000  | 0.9283  | -0.8605 | 0.8326  | 0.8425  |
| Cosine  | 0.8015  | 0.6126  | 0.6085  | 0.6394  | 0.7312  | 0.9142  | 0.9283  | 1.0000  | -0.8312 | 0.8043  | 0.8107  |
| TER     | -0.7138 | -0.5602 | -0.5393 | -0.5483 | -0.8704 | -0.8662 | -0.8605 | -0.8312 | 1.0000  | -0.8237 | -0.8558 |
| CHRF    | 0.6922  | 0.5387  | 0.5216  | 0.5283  | 0.8230  | 0.8638  | 0.8326  | 0.8043  | -0.8237 | 1.0000  | 0.9847  |
| BLEU    | 0.7055  | 0.5491  | 0.5317  | 0.5348  | 0.8350  | 0.8691  | 0.8425  | 0.8107  | -0.8558 | 0.9847  | 1.0000  |

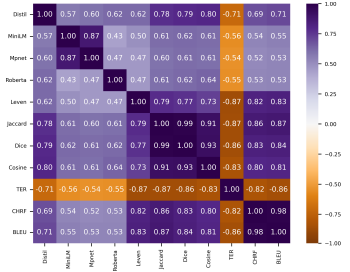

| MsaZho  | Distil  | MiniLM  | Mpnet   | Roberta | Leven   | Jaccard | Dice    | Cosine  | TER     | CHRF    | BLEU    |
|---------|---------|---------|---------|---------|---------|---------|---------|---------|---------|---------|---------|
| Distil  | 1.0000  | 0.6548  | 0.6676  | 0.7297  | 0.6927  | 0.8342  | 0.8536  | 0.8636  | -0.7955 | 0.7407  | 0.7645  |
| MiniLM  | 0.6548  | 1.0000  | 0.9040  | 0.5487  | 0.5653  | 0.6723  | 0.6891  | 0.6852  | -0.6422 | 0.5914  | 0.6100  |
| Mpnet   | 0.6676  | 0.9040  | 1.0000  | 0.5677  | 0.5436  | 0.6604  | 0.6818  | 0.6830  | -0.6268 | 0.5775  | 0.5976  |
| Roberta | 0.7297  | 0.5487  | 0.5677  | 1.0000  | 0.5956  | 0.7161  | 0.7344  | 0.7432  | -0.6805 | 0.6288  | 0.6492  |
| Leven   | 0.6927  | 0.5653  | 0.5436  | 0.5956  | 1.0000  | 0.8153  | 0.7998  | 0.7807  | -0.8987 | 0.8575  | 0.8696  |
| Jaccard | 0.8342  | 0.6723  | 0.6604  | 0.7161  | 0.8153  | 1.0000  | 0.9861  | 0.9433  | -0.9126 | 0.8822  | 0.8967  |
| Dice    | 0.8536  | 0.6891  | 0.6818  | 0.7344  | 0.7998  | 0.9861  | 1.0000  | 0.9629  | -0.9083 | 0.8445  | 0.8656  |
| Cosine  | 0.8636  | 0.6852  | 0.6830  | 0.7432  | 0.7807  | 0.9433  | 0.9629  | 1.0000  | -0.8953 | 0.8323  | 0.8544  |
| TER     | -0.7955 | -0.6422 | -0.6268 | -0.6805 | -0.8987 | -0.9126 | -0.9083 | -0.8953 | 1.0000  | -0.8701 | -0.9024 |
| CHRF    | 0.7407  | 0.5914  | 0.5775  | 0.6288  | 0.8575  | 0.8822  | 0.8445  | 0.8323  | -0.8701 | 1.0000  | 0.9872  |
| BLEU    | 0.7645  | 0.6100  | 0.5976  | 0.6492  | 0.8696  | 0.8967  | 0.8656  | 0.8544  | -0.9024 | 0.9872  | 1.0000  |

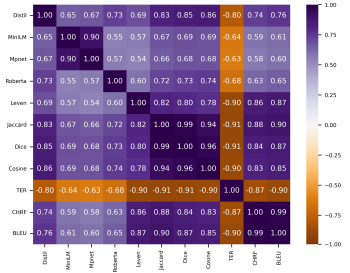

| MyaZho  | Distil  | MiniLM  | Mpnet   | Roberta | Leven   | Jaccard | Dice    | Cosine  | TER     | CHRF    | BLEU    |
|---------|---------|---------|---------|---------|---------|---------|---------|---------|---------|---------|---------|
| Distil  | 1.0000  | 0.6031  | 0.6129  | 0.6428  | 0.6378  | 0.8059  | 0.8192  | 0.8281  | -0.7259 | 0.7132  | 0.7258  |
| MiniLM  | 0.6031  | 1.0000  | 0.8909  | 0.4662  | 0.5056  | 0.6351  | 0.6482  | 0.6426  | -0.5668 | 0.5538  | 0.5639  |
| Mpnet   | 0.6129  | 0.8909  | 1.0000  | 0.4837  | 0.4837  | 0.6241  | 0.6391  | 0.6375  | -0.5502 | 0.5420  | 0.5520  |
| Roberta | 0.6428  | 0.4662  | 0.4837  | 1.0000  | 0.5073  | 0.6443  | 0.6559  | 0.6628  | -0.5791 | 0.5607  | 0.5698  |
| Leven   | 0.6378  | 0.5056  | 0.4837  | 0.5073  | 1.0000  | 0.7734  | 0.7554  | 0.7312  | -0.8429 | 0.8114  | 0.8224  |
| Jaccard | 0.8059  | 0.6351  | 0.6241  | 0.6443  | 0.7734  | 1.0000  | 0.9882  | 0.9394  | -0.8515 | 0.8660  | 0.8719  |
| Dice    | 0.8192  | 0.6482  | 0.6391  | 0.6559  | 0.7554  | 0.9882  | 1.0000  | 0.9534  | -0.8452 | 0.8318  | 0.8416  |
| Cosine  | 0.8281  | 0.6426  | 0.6375  | 0.6628  | 0.7312  | 0.9394  | 0.9534  | 1.0000  | -0.8264 | 0.8152  | 0.8217  |
| TER     | -0.7259 | -0.5668 | -0.5502 | -0.5791 | -0.8429 | -0.8515 | -0.8452 | -0.8264 | 1.0000  | -0.8005 | -0.8373 |
| CHRF    | 0.7132  | 0.5538  | 0.5420  | 0.5607  | 0.8114  | 0.8660  | 0.8318  | 0.8152  | -0.8005 | 1.0000  | 0.9840  |
| BLEU    | 0.7258  | 0.5639  | 0.5520  | 0.5698  | 0.8224  | 0.8719  | 0.8416  | 0.8217  | -0.8373 | 0.9840  | 1.0000  |

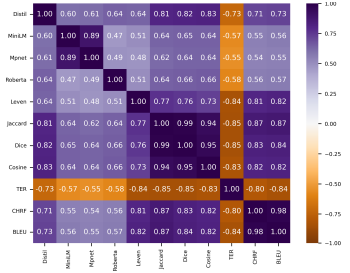

| PolZho  | Distil  | MiniLM  | Mpnet   | Roberta | Leven   | Jaccard | Dice    | Cosine  | TER     | CHRF    | BLEU    |
|---------|---------|---------|---------|---------|---------|---------|---------|---------|---------|---------|---------|
| Distil  | 1.0000  | 0.6179  | 0.6382  | 0.6931  | 0.6550  | 0.8108  | 0.8277  | 0.8412  | -0.7578 | 0.7248  | 0.7462  |
| MiniLM  | 0.6179  | 1.0000  | 0.8934  | 0.5072  | 0.5233  | 0.6425  | 0.6549  | 0.6518  | -0.5986 | 0.5664  | 0.5835  |
| Mpnet   | 0.6382  | 0.8934  | 1.0000  | 0.5325  | 0.5043  | 0.6349  | 0.6523  | 0.6543  | -0.5872 | 0.5578  | 0.5760  |
| Roberta | 0.6931  | 0.5072  | 0.5325  | 1.0000  | 0.5473  | 0.6808  | 0.6980  | 0.7086  | -0.6303 | 0.5982  | 0.6168  |
| Leven   | 0.6550  | 0.5233  | 0.5043  | 0.5473  | 1.0000  | 0.7872  | 0.7723  | 0.7498  | -0.8684 | 0.8296  | 0.8415  |
| Jaccard | 0.8108  | 0.6425  | 0.6349  | 0.6808  | 0.7872  | 1.0000  | 0.9879  | 0.9359  | -0.8774 | 0.8733  | 0.8850  |
| Dice    | 0.8277  | 0.6549  | 0.6523  | 0.6980  | 0.7723  | 0.9879  | 1.0000  | 0.9529  | -0.8749 | 0.8397  | 0.8577  |
| Cosine  | 0.8412  | 0.6518  | 0.6543  | 0.7086  | 0.7498  | 0.9359  | 0.9529  | 1.0000  | -0.8622 | 0.8268  | 0.8458  |
| TER     | -0.7578 | -0.5986 | -0.5872 | -0.6303 | -0.8684 | -0.8774 | -0.8749 | -0.8622 | 1.0000  | -0.8357 | -0.8688 |
| CHRF    | 0.7248  | 0.5664  | 0.5578  | 0.5982  | 0.8296  | 0.8733  | 0.8397  | 0.8268  | -0.8357 | 1.0000  | 0.9864  |
| BLEU    | 0.7462  | 0.5835  | 0.5760  | 0.6168  | 0.8415  | 0.8850  | 0.8577  | 0.8458  | -0.8688 | 0.9864  | 1.0000  |

| RusZho  | Distil  | MiniLM  | Mpnet   | Roberta | Leven   | Jaccard | Dice    | Cosine  | TER     | CHRF    | BLEU    |
|---------|---------|---------|---------|---------|---------|---------|---------|---------|---------|---------|---------|
| Distil  | 1.0000  | 0.6949  | 0.7114  | 0.7154  | 0.6671  | 0.8205  | 0.8457  | 0.8609  | -0.7629 | 0.7268  | 0.7502  |
| MiniLM  | 0.6949  | 1.0000  | 0.8935  | 0.5639  | 0.5718  | 0.7041  | 0.7333  | 0.7318  | -0.6503 | 0.6107  | 0.6315  |
| Mpnet   | 0.7114  | 0.8935  | 1.0000  | 0.5948  | 0.5475  | 0.6892  | 0.7226  | 0.7292  | -0.6335 | 0.5938  | 0.6153  |
| Roberta | 0.7154  | 0.5639  | 0.5948  | 1.0000  | 0.5409  | 0.6769  | 0.6964  | 0.7126  | -0.6251 | 0.5895  | 0.6089  |
| Leven   | 0.6671  | 0.5718  | 0.5475  | 0.5409  | 1.0000  | 0.7963  | 0.7739  | 0.7511  | -0.8641 | 0.8329  | 0.8417  |
| Jaccard | 0.8205  | 0.7041  | 0.6892  | 0.6769  | 0.7963  | 1.0000  | 0.9830  | 0.9372  | -0.8872 | 0.8855  | 0.8994  |
| Dice    | 0.8457  | 0.7333  | 0.7226  | 0.6964  | 0.7739  | 0.9830  | 1.0000  | 0.9604  | -0.8750 | 0.8405  | 0.8608  |
| Cosine  | 0.8609  | 0.7318  | 0.7292  | 0.7126  | 0.7511  | 0.9372  | 0.9604  | 1.0000  | -0.8590 | 0.8269  | 0.8476  |
| TER     | -0.7629 | -0.6503 | -0.6335 | -0.6251 | -0.8641 | -0.8872 | -0.8750 | -0.8590 | 1.0000  | -0.8436 | -0.8799 |
| CHRF    | 0.7268  | 0.6107  | 0.5938  | 0.5895  | 0.8329  | 0.8855  | 0.8405  | 0.8269  | -0.8436 | 1.0000  | 0.9863  |
| BLEU    | 0.7502  | 0.6315  | 0.6153  | 0.6089  | 0.8417  | 0.8994  | 0.8608  | 0.8476  | -0.8799 | 0.9863  | 1.0000  |

| SlkZho  | Distil  | MiniLM  | Mpnet   | Roberta | Leven   | Jaccard | Dice    | Cosine  | TER     | CHRF    | BLEU    |
|---------|---------|---------|---------|---------|---------|---------|---------|---------|---------|---------|---------|
| Distil  | 1.0000  | 0.6142  | 0.6352  | 0.6931  | 0.6483  | 0.8104  | 0.8268  | 0.8397  | -0.7523 | 0.7231  | 0.7443  |
| MiniLM  | 0.6142  | 1.0000  | 0.8936  | 0.5038  | 0.5206  | 0.6422  | 0.6546  | 0.6502  | -0.5945 | 0.5641  | 0.5807  |
| Mpnet   | 0.6352  | 0.8936  | 1.0000  | 0.5324  | 0.5008  | 0.6343  | 0.6517  | 0.6526  | -0.5829 | 0.5561  | 0.5738  |
| Roberta | 0.6931  | 0.5038  | 0.5324  | 1.0000  | 0.5412  | 0.6792  | 0.6962  | 0.7060  | -0.6280 | 0.5971  | 0.6156  |
| Leven   | 0.6483  | 0.5206  | 0.5008  | 0.5412  | 1.0000  | 0.7820  | 0.7672  | 0.7447  | -0.8643 | 0.8236  | 0.8351  |
| Jaccard | 0.8104  | 0.6422  | 0.6343  | 0.6792  | 0.7820  | 1.0000  | 0.9880  | 0.9359  | -0.8748 | 0.8716  | 0.8836  |
| Dice    | 0.8268  | 0.6546  | 0.6517  | 0.6962  | 0.7672  | 0.9880  | 1.0000  | 0.9529  | -0.8715 | 0.8383  | 0.8564  |
| Cosine  | 0.8397  | 0.6502  | 0.6526  | 0.7060  | 0.7447  | 0.9359  | 0.9529  | 1.0000  | -0.8572 | 0.8258  | 0.8446  |
| TER     | -0.7523 | -0.5945 | -0.5829 | -0.6280 | -0.8643 | -0.8748 | -0.8715 | -0.8572 | 1.0000  | -0.8324 | -0.8652 |
| CHRF    | 0.7231  | 0.5641  | 0.5561  | 0.5971  | 0.8236  | 0.8716  | 0.8383  | 0.8258  | -0.8324 | 1.0000  | 0.9864  |
| BLEU    | 0.7443  | 0.5807  | 0.5738  | 0.6156  | 0.8351  | 0.8836  | 0.8564  | 0.8446  | -0.8652 | 0.9864  | 1.0000  |

| SpaZho  | Distil  | MiniLM  | Mpnet   | Roberta | Leven   | Jaccard | Dice    | Cosine  | TER     | CHRF    | BLEU    |
|---------|---------|---------|---------|---------|---------|---------|---------|---------|---------|---------|---------|
| Distil  | 1.0000  | 0.5573  | 0.6192  | 0.5875  | 0.5193  | 0.6636  | 0.6765  | 0.7025  | -0.6316 | 0.5804  | 0.6049  |
| MiniLM  | 0.5573  | 1.0000  | 0.8531  | 0.4564  | 0.4637  | 0.5987  | 0.6105  | 0.6129  | -0.5558 | 0.5252  | 0.5447  |
| Mpnet   | 0.6192  | 0.8531  | 1.0000  | 0.4822  | 0.4415  | 0.5807  | 0.5963  | 0.6063  | -0.5391 | 0.5025  | 0.5238  |
| Roberta | 0.5875  | 0.4564  | 0.4822  | 1.0000  | 0.4500  | 0.6087  | 0.6277  | 0.6435  | -0.5548 | 0.5175  | 0.5403  |
| Leven   | 0.5193  | 0.4637  | 0.4415  | 0.4500  | 1.0000  | 0.7283  | 0.7152  | 0.6864  | -0.8426 | 0.7891  | 0.8000  |
| Jaccard | 0.6636  | 0.5987  | 0.5807  | 0.6087  | 0.7283  | 1.0000  | 0.9894  | 0.9185  | -0.8578 | 0.8582  | 0.8734  |
| Dice    | 0.6765  | 0.6105  | 0.5963  | 0.6277  | 0.7152  | 0.9894  | 1.0000  | 0.9344  | -0.8579 | 0.8310  | 0.8528  |
| Cosine  | 0.7025  | 0.6129  | 0.6063  | 0.6435  | 0.6864  | 0.9185  | 0.9344  | 1.0000  | -0.8323 | 0.8167  | 0.8393  |
| TER     | -0.6316 | -0.5558 | -0.5391 | -0.5548 | -0.8426 | -0.8578 | -0.8579 | -0.8323 | 1.0000  | -0.8157 | -0.8594 |
| CHRF    | 0.5804  | 0.5252  | 0.5025  | 0.5175  | 0.7891  | 0.8582  | 0.8310  | 0.8167  | -0.8157 | 1.0000  | 0.9838  |
| BLEU    | 0.6049  | 0.5447  | 0.5238  | 0.5403  | 0.8000  | 0.8734  | 0.8528  | 0.8393  | -0.8594 | 0.9838  | 1.0000  |

| ThaZho  | Distil  | MiniLM  | Mpnet   | Roberta | Leven   | Jaccard | Dice    | Cosine  | TER     | CHRF    | BLEU    |
|---------|---------|---------|---------|---------|---------|---------|---------|---------|---------|---------|---------|
| Distil  | 1.0000  | 0.5995  | 0.6165  | 0.6609  | 0.6273  | 0.7991  | 0.8152  | 0.8303  | -0.7439 | 0.7094  | 0.7266  |
| MiniLM  | 0.5995  | 1.0000  | 0.8859  | 0.4789  | 0.4962  | 0.6284  | 0.6411  | 0.6367  | -0.5806 | 0.5522  | 0.5656  |
| Mpnet   | 0.6165  | 0.8859  | 1.0000  | 0.5051  | 0.4775  | 0.6213  | 0.6378  | 0.6388  | -0.5689 | 0.5422  | 0.5565  |
| Roberta | 0.6609  | 0.4789  | 0.5051  | 1.0000  | 0.5074  | 0.6573  | 0.6734  | 0.6843  | -0.6051 | 0.5694  | 0.5843  |
| Leven   | 0.6273  | 0.4962  | 0.4775  | 0.5074  | 1.0000  | 0.7618  | 0.7465  | 0.7231  | -0.8654 | 0.8136  | 0.8230  |
| Jaccard | 0.7991  | 0.6284  | 0.6213  | 0.6573  | 0.7618  | 1.0000  | 0.9888  | 0.9304  | -0.8756 | 0.8626  | 0.8703  |
| Dice    | 0.8152  | 0.6411  | 0.6378  | 0.6734  | 0.7465  | 0.9888  | 1.0000  | 0.9460  | -0.8717 | 0.8321  | 0.8449  |
| Cosine  | 0.8303  | 0.6367  | 0.6388  | 0.6843  | 0.7231  | 0.9304  | 0.9460  | 1.0000  | -0.8527 | 0.8155  | 0.8284  |
| TER     | -0.7439 | -0.5806 | -0.5689 | -0.6051 | -0.8654 | -0.8756 | -0.8717 | -0.8527 | 1.0000  | -0.8364 | -0.8686 |
| CHRF    | 0.7094  | 0.5522  | 0.5422  | 0.5694  | 0.8136  | 0.8626  | 0.8321  | 0.8155  | -0.8364 | 1.0000  | 0.9855  |
| BLEU    | 0.7266  | 0.5656  | 0.5565  | 0.5843  | 0.8230  | 0.8703  | 0.8449  | 0.8284  | -0.8686 | 0.9855  | 1.0000  |

| UkrZho  | Distil  | MiniLM  | Mpnet   | Roberta | Leven   | Jaccard | Dice    | Cosine  | TER     | CHRF    | BLEU    |
|---------|---------|---------|---------|---------|---------|---------|---------|---------|---------|---------|---------|
| Distil  | 1.0000  | 0.6151  | 0.6363  | 0.6846  | 0.6531  | 0.8072  | 0.8236  | 0.8368  | -0.7600 | 0.7228  | 0.7442  |
| MiniLM  | 0.6151  | 1.0000  | 0.8919  | 0.5030  | 0.5226  | 0.6412  | 0.6544  | 0.6501  | -0.6018 | 0.5655  | 0.5824  |
| Mpnet   | 0.6363  | 0.8919  | 1.0000  | 0.5279  | 0.5053  | 0.6349  | 0.6528  | 0.6534  | -0.5919 | 0.5582  | 0.5766  |
| Roberta | 0.6846  | 0.5030  | 0.5279  | 1.0000  | 0.5429  | 0.6721  | 0.6886  | 0.6993  | -0.6288 | 0.5922  | 0.6100  |
| Leven   | 0.6531  | 0.5226  | 0.5053  | 0.5429  | 1.0000  | 0.7861  | 0.7720  | 0.7491  | -0.8803 | 0.8295  | 0.8409  |
| Jaccard | 0.8072  | 0.6412  | 0.6349  | 0.6721  | 0.7861  | 1.0000  | 0.9881  | 0.9335  | -0.8891 | 0.8727  | 0.8844  |
| Dice    | 0.8236  | 0.6544  | 0.6528  | 0.6886  | 0.7720  | 0.9881  | 1.0000  | 0.9504  | -0.8859 | 0.8400  | 0.8581  |
| Cosine  | 0.8368  | 0.6501  | 0.6534  | 0.6993  | 0.7491  | 0.9335  | 0.9504  | 1.0000  | -0.8700 | 0.8269  | 0.8459  |
| TER     | -0.7600 | -0.6018 | -0.5919 | -0.6288 | -0.8803 | -0.8891 | -0.8859 | -0.8700 | 1.0000  | -0.8485 | -0.8810 |
| CHRF    | 0.7228  | 0.5655  | 0.5582  | 0.5922  | 0.8295  | 0.8727  | 0.8400  | 0.8269  | -0.8485 | 1.0000  | 0.9865  |
| BLEU    | 0.7442  | 0.5824  | 0.5766  | 0.6100  | 0.8409  | 0.8844  | 0.8581  | 0.8459  | -0.8810 | 0.9865  | 1.0000  |

| VieZho  | Distil  | MiniLM  | Mpnet   | Roberta | Leven   | Jaccard | Dice    | Cosine  | TER     | CHRF    | BLEU    |
|---------|---------|---------|---------|---------|---------|---------|---------|---------|---------|---------|---------|
| Distil  | 1.0000  | 0.6293  | 0.6499  | 0.7025  | 0.6521  | 0.8169  | 0.8350  | 0.8463  | -0.7275 | 0.7228  | 0.7419  |
| MiniLM  | 0.6293  | 1.0000  | 0.8967  | 0.5155  | 0.5296  | 0.6518  | 0.6661  | 0.6641  | -0.5858 | 0.5699  | 0.5849  |
| Mpnet   | 0.6499  | 0.8967  | 1.0000  | 0.5420  | 0.5106  | 0.6463  | 0.6652  | 0.6671  | -0.5737 | 0.5633  | 0.5791  |
| Roberta | 0.7025  | 0.5155  | 0.5420  | 1.0000  | 0.5421  | 0.6836  | 0.7020  | 0.7117  | -0.6068 | 0.5953  | 0.6113  |
| Leven   | 0.6521  | 0.5296  | 0.5106  | 0.5421  | 1.0000  | 0.7864  | 0.7709  | 0.7487  | -0.8341 | 0.8282  | 0.8392  |
| Jaccard | 0.8169  | 0.6518  | 0.6463  | 0.6836  | 0.7864  | 1.0000  | 0.9868  | 0.9361  | -0.8428 | 0.8702  | 0.8809  |
| Dice    | 0.8350  | 0.6661  | 0.6652  | 0.7020  | 0.7709  | 0.9868  | 1.0000  | 0.9548  | -0.8394 | 0.8340  | 0.8502  |
| Cosine  | 0.8463  | 0.6641  | 0.6671  | 0.7117  | 0.7487  | 0.9361  | 0.9548  | 1.0000  | -0.8327 | 0.8208  | 0.8377  |
| TER     | -0.7275 | -0.5858 | -0.5737 | -0.6068 | -0.8341 | -0.8428 | -0.8394 | -0.8327 | 1.0000  | -0.8009 | -0.8314 |
| CHRF    | 0.7228  | 0.5699  | 0.5633  | 0.5953  | 0.8282  | 0.8702  | 0.8340  | 0.8208  | -0.8009 | 1.0000  | 0.9866  |
| BLEU    | 0.7419  | 0.5849  | 0.5791  | 0.6113  | 0.8392  | 0.8809  | 0.8502  | 0.8377  | -0.8314 | 0.9866  | 1.0000  |

2. Kendall Correlation Coefficient (XZho)

|         |         |         |         |         |         |         |         |         |         |         |         |                                                                                    |
|---------|---------|---------|---------|---------|---------|---------|---------|---------|---------|---------|---------|------------------------------------------------------------------------------------|
| AraZho  | Distil  | MiniLM  | Mpnet   | Roberta | Leven   | Jaccard | Dice    | Cosine  | TER     | CHRF    | BLEU    | 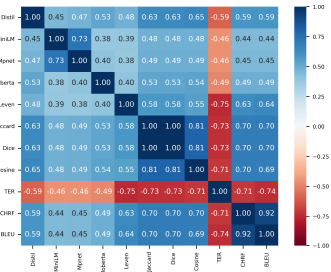 |
| Distil  | 1.0000  | 0.4518  | 0.4736  | 0.5297  | 0.4798  | 0.6340  | 0.6340  | 0.6507  | -0.5890 | 0.5867  | 0.5903  |                                                                                    |
| MiniLM  | 0.4518  | 1.0000  | 0.7321  | 0.3769  | 0.3871  | 0.4838  | 0.4838  | 0.4788  | -0.4568 | 0.4415  | 0.4450  |                                                                                    |
| Mpnet   | 0.4736  | 0.7321  | 1.0000  | 0.3989  | 0.3823  | 0.4864  | 0.4864  | 0.4851  | -0.4555 | 0.4476  | 0.4507  |                                                                                    |
| Roberta | 0.5297  | 0.3769  | 0.3989  | 1.0000  | 0.4043  | 0.5275  | 0.5275  | 0.5359  | -0.4866 | 0.4876  | 0.4901  |                                                                                    |
| Leven   | 0.4798  | 0.3871  | 0.3823  | 0.4043  | 1.0000  | 0.5785  | 0.5785  | 0.5543  | -0.7479 | 0.6303  | 0.6433  |                                                                                    |
| Jaccard | 0.6340  | 0.4838  | 0.4864  | 0.5275  | 0.5785  | 1.0000  | 1.0000  | 0.8072  | -0.7306 | 0.6966  | 0.6977  |                                                                                    |
| Dice    | 0.6340  | 0.4838  | 0.4864  | 0.5275  | 0.5785  | 1.0000  | 1.0000  | 0.8072  | -0.7306 | 0.6966  | 0.6977  |                                                                                    |
| Cosine  | 0.6507  | 0.4788  | 0.4851  | 0.5359  | 0.5543  | 0.8072  | 0.8072  | 1.0000  | -0.7055 | 0.6954  | 0.6946  |                                                                                    |
| TER     | -0.5890 | -0.4568 | -0.4555 | -0.4866 | -0.7479 | -0.7306 | -0.7306 | -0.7055 | 1.0000  | -0.7052 | -0.7372 |                                                                                    |
| CHRF    | 0.5867  | 0.4415  | 0.4476  | 0.4876  | 0.6303  | 0.6966  | 0.6966  | 0.6954  | -0.7052 | 1.0000  | 0.9204  |                                                                                    |
| BLEU    | 0.5903  | 0.4450  | 0.4507  | 0.4901  | 0.6433  | 0.6977  | 0.6977  | 0.6946  | -0.7372 | 0.9204  | 1.0000  |                                                                                    |

|         |         |         |         |         |         |         |         |         |         |         |         |                                                                                     |
|---------|---------|---------|---------|---------|---------|---------|---------|---------|---------|---------|---------|-------------------------------------------------------------------------------------|
| CesZho  | Distil  | MiniLM  | Mpnet   | Roberta | Leven   | Jaccard | Dice    | Cosine  | TER     | CHRF    | BLEU    |  |
| Distil  | 1.0000  | 0.4576  | 0.4769  | 0.5413  | 0.4974  | 0.6469  | 0.6469  | 0.6622  | -0.6037 | 0.5994  | 0.6022  |                                                                                     |
| MiniLM  | 0.4576  | 1.0000  | 0.7475  | 0.3835  | 0.3960  | 0.4852  | 0.4852  | 0.4801  | -0.4625 | 0.4468  | 0.4502  |                                                                                     |
| Mpnet   | 0.4769  | 0.7475  | 1.0000  | 0.4040  | 0.3897  | 0.4871  | 0.4871  | 0.4856  | -0.4597 | 0.4522  | 0.4554  |                                                                                     |
| Roberta | 0.5413  | 0.3835  | 0.4040  | 1.0000  | 0.4273  | 0.5443  | 0.5443  | 0.5518  | -0.5074 | 0.5072  | 0.5092  |                                                                                     |
| Leven   | 0.4974  | 0.3960  | 0.3897  | 0.4273  | 1.0000  | 0.5937  | 0.5937  | 0.5719  | -0.7649 | 0.6417  | 0.6553  |                                                                                     |
| Jaccard | 0.6469  | 0.4852  | 0.4871  | 0.5443  | 0.5937  | 1.0000  | 1.0000  | 0.8166  | -0.7394 | 0.6999  | 0.7001  |                                                                                     |
| Dice    | 0.6469  | 0.4852  | 0.4871  | 0.5443  | 0.5937  | 1.0000  | 1.0000  | 0.8166  | -0.7394 | 0.6999  | 0.7001  |                                                                                     |
| Cosine  | 0.6622  | 0.4801  | 0.4856  | 0.5518  | 0.5719  | 0.8166  | 0.8166  | 1.0000  | -0.7173 | 0.6996  | 0.6984  |                                                                                     |
| TER     | -0.6037 | -0.4625 | -0.4597 | -0.5074 | -0.7649 | -0.7394 | -0.7394 | -0.7173 | 1.0000  | -0.7146 | -0.7442 |                                                                                     |
| CHRF    | 0.5994  | 0.4468  | 0.4522  | 0.5072  | 0.6417  | 0.6999  | 0.6999  | 0.6996  | -0.7146 | 1.0000  | 0.9228  |                                                                                     |
| BLEU    | 0.6022  | 0.4502  | 0.4554  | 0.5092  | 0.6553  | 0.7001  | 0.7001  | 0.6984  | -0.7442 | 0.9228  | 1.0000  |                                                                                     |

|         |         |         |         |         |         |         |         |         |         |         |         |                                                                                     |
|---------|---------|---------|---------|---------|---------|---------|---------|---------|---------|---------|---------|-------------------------------------------------------------------------------------|
| EngZho  | Distil  | MiniLM  | Mpnet   | Roberta | Leven   | Jaccard | Dice    | Cosine  | TER     | CHRF    | BLEU    |  |
| Distil  | 1.0000  | 0.4612  | 0.4868  | 0.5317  | 0.4952  | 0.6264  | 0.6264  | 0.6456  | -0.5947 | 0.5674  | 0.5762  |                                                                                     |
| MiniLM  | 0.4612  | 1.0000  | 0.7487  | 0.3901  | 0.4047  | 0.4858  | 0.4858  | 0.4770  | -0.4671 | 0.4388  | 0.4460  |                                                                                     |
| Mpnet   | 0.4868  | 0.7487  | 1.0000  | 0.4071  | 0.4001  | 0.4866  | 0.4866  | 0.4792  | -0.4661 | 0.4401  | 0.4478  |                                                                                     |
| Roberta | 0.5317  | 0.3901  | 0.4071  | 1.0000  | 0.4343  | 0.5445  | 0.5445  | 0.5476  | -0.5096 | 0.4952  | 0.5019  |                                                                                     |
| Leven   | 0.4952  | 0.4047  | 0.4001  | 0.4343  | 1.0000  | 0.6046  | 0.6046  | 0.5777  | -0.7715 | 0.6411  | 0.6599  |                                                                                     |
| Jaccard | 0.6264  | 0.4858  | 0.4866  | 0.5445  | 0.6046  | 1.0000  | 1.0000  | 0.8053  | -0.7398 | 0.6905  | 0.6974  |                                                                                     |
| Dice    | 0.6264  | 0.4858  | 0.4866  | 0.5445  | 0.6046  | 1.0000  | 1.0000  | 0.8053  | -0.7398 | 0.6905  | 0.6974  |                                                                                     |
| Cosine  | 0.6456  | 0.4770  | 0.4792  | 0.5476  | 0.5777  | 0.8053  | 0.8053  | 1.0000  | -0.7107 | 0.6899  | 0.6938  |                                                                                     |
| TER     | -0.5947 | -0.4671 | -0.4661 | -0.5096 | -0.7715 | -0.7398 | -0.7398 | -0.7107 | 1.0000  | -0.7023 | -0.7418 |                                                                                     |
| CHRF    | 0.5674  | 0.4388  | 0.4401  | 0.4952  | 0.6411  | 0.6905  | 0.6905  | 0.6899  | -0.7023 | 1.0000  | 0.9160  |                                                                                     |
| BLEU    | 0.5762  | 0.4460  | 0.4478  | 0.5019  | 0.6599  | 0.6974  | 0.6974  | 0.6938  | -0.7418 | 0.9160  | 1.0000  |                                                                                     |

|         |         |         |         |         |         |         |         |         |         |         |         |                                                                                      |
|---------|---------|---------|---------|---------|---------|---------|---------|---------|---------|---------|---------|--------------------------------------------------------------------------------------|
| FilZho  | Distil  | MiniLM  | Mpnet   | Roberta | Leven   | Jaccard | Dice    | Cosine  | TER     | CHRF    | BLEU    |  |
| Distil  | 1.0000  | 0.4540  | 0.4742  | 0.5341  | 0.4896  | 0.6386  | 0.6386  | 0.6556  | -0.5976 | 0.5919  | 0.5966  |                                                                                      |
| MiniLM  | 0.4540  | 1.0000  | 0.7386  | 0.3800  | 0.3906  | 0.4820  | 0.4820  | 0.4782  | -0.4592 | 0.4445  | 0.4487  |                                                                                      |
| Mpnet   | 0.4742  | 0.7386  | 1.0000  | 0.3987  | 0.3862  | 0.4844  | 0.4844  | 0.4836  | -0.4582 | 0.4494  | 0.4535  |                                                                                      |
| Roberta | 0.5341  | 0.3800  | 0.3987  | 1.0000  | 0.4153  | 0.5364  | 0.5364  | 0.5421  | -0.4969 | 0.4954  | 0.4993  |                                                                                      |
| Leven   | 0.4896  | 0.3906  | 0.3862  | 0.4153  | 1.0000  | 0.5855  | 0.5855  | 0.5661  | -0.7580 | 0.6371  | 0.6510  |                                                                                      |
| Jaccard | 0.6386  | 0.4820  | 0.4844  | 0.5364  | 0.5855  | 1.0000  | 1.0000  | 0.8087  | -0.7354 | 0.6957  | 0.6990  |                                                                                      |
| Dice    | 0.6386  | 0.4820  | 0.4844  | 0.5364  | 0.5855  | 1.0000  | 1.0000  | 0.8087  | -0.7354 | 0.6957  | 0.6990  |                                                                                      |
| Cosine  | 0.6556  | 0.4782  | 0.4836  | 0.5421  | 0.5661  | 0.8087  | 0.8087  | 1.0000  | -0.7151 | 0.6960  | 0.6981  |                                                                                      |
| TER     | -0.5976 | -0.4592 | -0.4582 | -0.4969 | -0.7580 | -0.7354 | -0.7354 | -0.7151 | 1.0000  | -0.7117 | -0.7445 |                                                                                      |
| CHRF    | 0.5919  | 0.4445  | 0.4494  | 0.4954  | 0.6371  | 0.6957  | 0.6957  | 0.6960  | -0.7117 | 1.0000  | 0.9216  |                                                                                      |
| BLEU    | 0.5966  | 0.4487  | 0.4535  | 0.4993  | 0.6510  | 0.6990  | 0.6990  | 0.6981  | -0.7445 | 0.9216  | 1.0000  |                                                                                      |

|         |         |         |         |         |         |         |         |         |         |         |         |                                                                                       |
|---------|---------|---------|---------|---------|---------|---------|---------|---------|---------|---------|---------|---------------------------------------------------------------------------------------|
| FraZho  | Distil  | MiniLM  | Mpnet   | Roberta | Leven   | Jaccard | Dice    | Cosine  | TER     | CHRF    | BLEU    |  |
| Distil  | 1.0000  | 0.4368  | 0.4667  | 0.5000  | 0.4464  | 0.5870  | 0.5870  | 0.6081  | -0.5457 | 0.5428  | 0.5480  |                                                                                       |
| MiniLM  | 0.4368  | 1.0000  | 0.7043  | 0.3553  | 0.3690  | 0.4656  | 0.4656  | 0.4606  | -0.4366 | 0.4242  | 0.4292  |                                                                                       |
| Mpnet   | 0.4667  | 0.7043  | 1.0000  | 0.3787  | 0.3610  | 0.4642  | 0.4642  | 0.4644  | -0.4320 | 0.4257  | 0.4305  |                                                                                       |
| Roberta | 0.5000  | 0.3553  | 0.3787  | 1.0000  | 0.3641  | 0.4935  | 0.4935  | 0.5046  | -0.4421 | 0.4517  | 0.4545  |                                                                                       |
| Leven   | 0.4464  | 0.3690  | 0.3610  | 0.3641  | 1.0000  | 0.5694  | 0.5694  | 0.5409  | -0.7320 | 0.6069  | 0.6198  |                                                                                       |
| Jaccard | 0.5870  | 0.4656  | 0.4642  | 0.4935  | 0.5694  | 1.0000  | 1.0000  | 0.7916  | -0.7137 | 0.6900  | 0.6916  |                                                                                       |
| Dice    | 0.5870  | 0.4656  | 0.4642  | 0.4935  | 0.5694  | 1.0000  | 1.0000  | 0.7916  | -0.7137 | 0.6900  | 0.6916  |                                                                                       |
| Cosine  | 0.6081  | 0.4606  | 0.4644  | 0.5046  | 0.5409  | 0.7916  | 0.7916  | 1.0000  | -0.6824 | 0.6906  | 0.6894  |                                                                                       |
| TER     | -0.5457 | -0.4366 | -0.4320 | -0.4421 | -0.7320 | -0.7137 | -0.7137 | -0.6824 | 1.0000  | -0.6763 | -0.7153 |                                                                                       |
| CHRF    | 0.5428  | 0.4242  | 0.4257  | 0.4517  | 0.6069  | 0.6900  | 0.6900  | 0.6906  | -0.6763 | 1.0000  | 0.9124  |                                                                                       |
| BLEU    | 0.5480  | 0.4292  | 0.4305  | 0.4545  | 0.6198  | 0.6916  | 0.6916  | 0.6894  | -0.7153 | 0.9124  | 1.0000  |                                                                                       |

|         |         |         |         |         |         |         |         |         |         |         |         |                                                                                       |
|---------|---------|---------|---------|---------|---------|---------|---------|---------|---------|---------|---------|---------------------------------------------------------------------------------------|
| IndZho  | Distil  | MiniLM  | Mpnet   | Roberta | Leven   | Jaccard | Dice    | Cosine  | TER     | CHRF    | BLEU    |  |
| Distil  | 1.0000  | 0.4812  | 0.4941  | 0.5727  | 0.5372  | 0.6737  | 0.6737  | 0.6870  | -0.6346 | 0.6162  | 0.6236  |                                                                                       |
| MiniLM  | 0.4812  | 1.0000  | 0.7697  | 0.4131  | 0.4318  | 0.5071  | 0.5071  | 0.5022  | -0.4906 | 0.4684  | 0.4746  |                                                                                       |
| Mpnet   | 0.4941  | 0.7697  | 1.0000  | 0.4264  | 0.4241  | 0.5052  | 0.5052  | 0.5028  | -0.4857 | 0.4682  | 0.4744  |                                                                                       |
| Roberta | 0.5727  | 0.4131  | 0.4264  | 1.0000  | 0.4767  | 0.5804  | 0.5804  | 0.5849  | -0.5502 | 0.5352  | 0.5418  |                                                                                       |
| Leven   | 0.5372  | 0.4318  | 0.4241  | 0.4767  | 1.0000  | 0.6327  | 0.6327  | 0.6149  | -0.7912 | 0.6902  | 0.7066  |                                                                                       |
| Jaccard | 0.6737  | 0.5071  | 0.5052  | 0.5804  | 0.6327  | 1.0000  | 1.0000  | 0.8379  | -0.7647 | 0.7134  | 0.7210  |                                                                                       |
| Dice    | 0.6737  | 0.5071  | 0.5052  | 0.5804  | 0.6327  | 1.0000  | 1.0000  | 0.8379  | -0.7647 | 0.7134  | 0.7210  |                                                                                       |
| Cosine  | 0.6870  | 0.5022  | 0.5028  | 0.5849  | 0.6149  | 0.8379  | 0.8379  | 1.0000  | -0.7475 | 0.7142  | 0.7205  |                                                                                       |
| TER     | -0.6346 | -0.4906 | -0.4857 | -0.5502 | -0.7912 | -0.7647 | -0.7647 | -0.7475 | 1.0000  | -0.7423 | -0.7770 |                                                                                       |
| CHRF    | 0.6162  | 0.4684  | 0.4682  | 0.5352  | 0.6902  | 0.7134  | 0.7134  | 0.7142  | -0.7423 | 1.0000  | 0.9250  |                                                                                       |
| BLEU    | 0.6236  | 0.4746  | 0.4744  | 0.5418  | 0.7066  | 0.7210  | 0.7210  | 0.7205  | -0.7770 | 0.9250  | 1.0000  |                                                                                       |

| ItaZho  | Distil  | MiniLM  | Mpnet   | Roberta | Leven   | Jaccard | Dice    | Cosine  | TER     | CHRF    | BLEU    |
|---------|---------|---------|---------|---------|---------|---------|---------|---------|---------|---------|---------|
| Distil  | 1.0000  | 0.4726  | 0.4910  | 0.5651  | 0.5196  | 0.6662  | 0.6662  | 0.6800  | -0.6217 | 0.6196  | 0.6209  |
| MiniLM  | 0.4726  | 1.0000  | 0.7588  | 0.4014  | 0.4174  | 0.5006  | 0.5006  | 0.4956  | -0.4784 | 0.4625  | 0.4653  |
| Mpnet   | 0.4910  | 0.7588  | 1.0000  | 0.4219  | 0.4124  | 0.5037  | 0.5037  | 0.5019  | -0.4778 | 0.4688  | 0.4713  |
| Roberta | 0.5651  | 0.4014  | 0.4219  | 1.0000  | 0.4497  | 0.5676  | 0.5676  | 0.5753  | -0.5288 | 0.5299  | 0.5305  |
| Leven   | 0.5196  | 0.4174  | 0.4124  | 0.4497  | 1.0000  | 0.6170  | 0.6170  | 0.5959  | -0.7737 | 0.6615  | 0.6742  |
| Jaccard | 0.6662  | 0.5006  | 0.5037  | 0.5676  | 0.6170  | 1.0000  | 1.0000  | 0.8286  | -0.7520 | 0.7173  | 0.7159  |
| Dice    | 0.6662  | 0.5006  | 0.5037  | 0.5676  | 0.6170  | 1.0000  | 1.0000  | 0.8286  | -0.7520 | 0.7173  | 0.7159  |
| Cosine  | 0.6800  | 0.4956  | 0.5019  | 0.5753  | 0.5959  | 0.8286  | 0.8286  | 1.0000  | -0.7313 | 0.7167  | 0.7138  |
| TER     | -0.6217 | -0.4784 | -0.4778 | -0.5288 | -0.7737 | -0.7520 | -0.7520 | -0.7313 | 1.0000  | -0.7267 | -0.7562 |
| CHRF    | 0.6196  | 0.4625  | 0.4688  | 0.5299  | 0.6615  | 0.7173  | 0.7173  | 0.7167  | -0.7267 | 1.0000  | 0.9236  |
| BLEU    | 0.6209  | 0.4653  | 0.4713  | 0.5305  | 0.6742  | 0.7159  | 0.7159  | 0.7138  | -0.7562 | 0.9236  | 1.0000  |

| KazZho  | Distil  | MiniLM  | Mpnet   | Roberta | Leven   | Jaccard | Dice    | Cosine  | TER     | CHRF    | BLEU    |
|---------|---------|---------|---------|---------|---------|---------|---------|---------|---------|---------|---------|
| Distil  | 1.0000  | 0.4499  | 0.4672  | 0.5104  | 0.4549  | 0.6303  | 0.6303  | 0.6432  | -0.5735 | 0.5893  | 0.5850  |
| MiniLM  | 0.4499  | 1.0000  | 0.7276  | 0.3614  | 0.3720  | 0.4796  | 0.4796  | 0.4719  | -0.4473 | 0.4443  | 0.4429  |
| Mpnet   | 0.4672  | 0.7276  | 1.0000  | 0.3820  | 0.3597  | 0.4787  | 0.4787  | 0.4745  | -0.4394 | 0.4468  | 0.4449  |
| Roberta | 0.5104  | 0.3614  | 0.3820  | 1.0000  | 0.3677  | 0.5078  | 0.5078  | 0.5124  | -0.4561 | 0.4758  | 0.4720  |
| Leven   | 0.4549  | 0.3720  | 0.3597  | 0.3677  | 1.0000  | 0.5540  | 0.5540  | 0.5276  | -0.7287 | 0.5905  | 0.5993  |
| Jaccard | 0.6303  | 0.4796  | 0.4787  | 0.5078  | 0.5540  | 1.0000  | 1.0000  | 0.8031  | -0.7144 | 0.7007  | 0.6891  |
| Dice    | 0.6303  | 0.4796  | 0.4787  | 0.5078  | 0.5540  | 1.0000  | 1.0000  | 0.8031  | -0.7144 | 0.7007  | 0.6891  |
| Cosine  | 0.6432  | 0.4719  | 0.4745  | 0.5124  | 0.5276  | 0.8031  | 0.8031  | 1.0000  | -0.6852 | 0.6942  | 0.6812  |
| TER     | -0.5735 | -0.4473 | -0.4394 | -0.4561 | -0.7287 | -0.7144 | -0.7144 | -0.6852 | 1.0000  | -0.6855 | -0.7091 |
| CHRF    | 0.5893  | 0.4443  | 0.4468  | 0.4758  | 0.5905  | 0.7007  | 0.7007  | 0.6942  | -0.6855 | 1.0000  | 0.9179  |
| BLEU    | 0.5850  | 0.4429  | 0.4449  | 0.4720  | 0.5993  | 0.6891  | 0.6891  | 0.6812  | -0.7091 | 0.9179  | 1.0000  |

| KhmZho  | Distil  | MiniLM  | Mpnet   | Roberta | Leven   | Jaccard | Dice    | Cosine  | TER     | CHRF    | BLEU    |
|---------|---------|---------|---------|---------|---------|---------|---------|---------|---------|---------|---------|
| Distil  | 1.0000  | 0.4268  | 0.4436  | 0.4870  | 0.4571  | 0.6168  | 0.6168  | 0.6340  | -0.5671 | 0.5677  | 0.5650  |
| MiniLM  | 0.4268  | 1.0000  | 0.7164  | 0.3418  | 0.3628  | 0.4604  | 0.4604  | 0.4547  | -0.4296 | 0.4235  | 0.4218  |
| Mpnet   | 0.4436  | 0.7164  | 1.0000  | 0.3633  | 0.3530  | 0.4596  | 0.4596  | 0.4580  | -0.4233 | 0.4231  | 0.4214  |
| Roberta | 0.4870  | 0.3418  | 0.3633  | 1.0000  | 0.3719  | 0.4962  | 0.4962  | 0.5046  | -0.4531 | 0.4561  | 0.4541  |
| Leven   | 0.4571  | 0.3628  | 0.3530  | 0.3719  | 1.0000  | 0.5602  | 0.5602  | 0.5354  | -0.7361 | 0.6145  | 0.6232  |
| Jaccard | 0.6168  | 0.4604  | 0.4596  | 0.4962  | 0.5602  | 1.0000  | 1.0000  | 0.7919  | -0.7116 | 0.6858  | 0.6751  |
| Dice    | 0.6168  | 0.4604  | 0.4596  | 0.4962  | 0.5602  | 1.0000  | 1.0000  | 0.7919  | -0.7116 | 0.6858  | 0.6751  |
| Cosine  | 0.6340  | 0.4547  | 0.4580  | 0.5046  | 0.5354  | 0.7919  | 0.7919  | 1.0000  | -0.6836 | 0.6733  | 0.6622  |
| TER     | -0.5671 | -0.4296 | -0.4233 | -0.4531 | -0.7361 | -0.7116 | -0.7116 | -0.6836 | 1.0000  | -0.6909 | -0.7147 |
| CHRF    | 0.5677  | 0.4235  | 0.4231  | 0.4561  | 0.6145  | 0.6858  | 0.6858  | 0.6733  | -0.6909 | 1.0000  | 0.9166  |
| BLEU    | 0.5650  | 0.4218  | 0.4214  | 0.4541  | 0.6232  | 0.6751  | 0.6751  | 0.6622  | -0.7147 | 0.9166  | 1.0000  |

| KirZho  | Distil  | MiniLM  | Mpnet   | Roberta | Leven   | Jaccard | Dice    | Cosine  | TER     | CHRF    | BLEU    |
|---------|---------|---------|---------|---------|---------|---------|---------|---------|---------|---------|---------|
| Distil  | 1.0000  | 0.4423  | 0.4607  | 0.4960  | 0.4455  | 0.6199  | 0.6199  | 0.6335  | -0.5561 | 0.5841  | 0.5765  |
| MiniLM  | 0.4423  | 1.0000  | 0.7203  | 0.3473  | 0.3700  | 0.4753  | 0.4753  | 0.4656  | -0.4390 | 0.4411  | 0.4376  |
| Mpnet   | 0.4607  | 0.7203  | 1.0000  | 0.3682  | 0.3565  | 0.4745  | 0.4745  | 0.4680  | -0.4305 | 0.4428  | 0.4389  |
| Roberta | 0.4960  | 0.3473  | 0.3682  | 1.0000  | 0.3506  | 0.4899  | 0.4899  | 0.4962  | -0.4334 | 0.4608  | 0.4540  |
| Leven   | 0.4455  | 0.3700  | 0.3565  | 0.3506  | 1.0000  | 0.5527  | 0.5527  | 0.5231  | -0.7226 | 0.5808  | 0.5885  |
| Jaccard | 0.6199  | 0.4753  | 0.4745  | 0.4899  | 0.5527  | 1.0000  | 1.0000  | 0.7969  | -0.7025 | 0.7047  | 0.6870  |
| Dice    | 0.6199  | 0.4753  | 0.4745  | 0.4899  | 0.5527  | 1.0000  | 1.0000  | 0.7969  | -0.7025 | 0.7047  | 0.6870  |
| Cosine  | 0.6335  | 0.4656  | 0.4680  | 0.4962  | 0.5231  | 0.7969  | 0.7969  | 1.0000  | -0.6702 | 0.6938  | 0.6744  |
| TER     | -0.5561 | -0.4390 | -0.4305 | -0.4334 | -0.7226 | -0.7025 | -0.7025 | -0.6702 | 1.0000  | -0.6711 | -0.6930 |
| CHRF    | 0.5841  | 0.4411  | 0.4428  | 0.4608  | 0.5808  | 0.7047  | 0.7047  | 0.6938  | -0.6711 | 1.0000  | 0.9140  |
| BLEU    | 0.5765  | 0.4376  | 0.4389  | 0.4540  | 0.5885  | 0.6870  | 0.6870  | 0.6744  | -0.6930 | 0.9140  | 1.0000  |

| LaoZho  | Distil  | MiniLM  | Mpnet   | Roberta | Leven   | Jaccard | Dice    | Cosine  | TER     | CHRF    | BLEU    |
|---------|---------|---------|---------|---------|---------|---------|---------|---------|---------|---------|---------|
| Distil  | 1.0000  | 0.4207  | 0.4379  | 0.4590  | 0.4500  | 0.6011  | 0.6011  | 0.6122  | -0.5487 | 0.5583  | 0.5502  |
| MiniLM  | 0.4207  | 1.0000  | 0.7132  | 0.3210  | 0.3651  | 0.4575  | 0.4575  | 0.4466  | -0.4241 | 0.4219  | 0.4169  |
| Mpnet   | 0.4379  | 0.7132  | 1.0000  | 0.3437  | 0.3490  | 0.4527  | 0.4527  | 0.4462  | -0.4131 | 0.4181  | 0.4129  |
| Roberta | 0.4590  | 0.3210  | 0.3437  | 1.0000  | 0.3459  | 0.4622  | 0.4622  | 0.4729  | -0.4163 | 0.4323  | 0.4239  |
| Leven   | 0.4500  | 0.3651  | 0.3490  | 0.3459  | 1.0000  | 0.5755  | 0.5755  | 0.5370  | -0.7428 | 0.6139  | 0.6216  |
| Jaccard | 0.6011  | 0.4575  | 0.4527  | 0.4622  | 0.5755  | 1.0000  | 1.0000  | 0.7708  | -0.7090 | 0.6901  | 0.6708  |
| Dice    | 0.6011  | 0.4575  | 0.4527  | 0.4622  | 0.5755  | 1.0000  | 1.0000  | 0.7708  | -0.7090 | 0.6901  | 0.6708  |
| Cosine  | 0.6122  | 0.4466  | 0.4462  | 0.4729  | 0.5370  | 0.7708  | 0.7708  | 1.0000  | -0.6664 | 0.6648  | 0.6423  |
| TER     | -0.5487 | -0.4241 | -0.4131 | -0.4163 | -0.7428 | -0.7090 | -0.7090 | -0.6664 | 1.0000  | -0.6806 | -0.7000 |
| CHRF    | 0.5583  | 0.4219  | 0.4181  | 0.4323  | 0.6139  | 0.6901  | 0.6901  | 0.6648  | -0.6806 | 1.0000  | 0.9097  |
| BLEU    | 0.5502  | 0.4169  | 0.4129  | 0.4239  | 0.6216  | 0.6708  | 0.6708  | 0.6423  | -0.7000 | 0.9097  | 1.0000  |

| MsaZho  | Distil  | MiniLM  | Mpnet   | Roberta | Leven   | Jaccard | Dice    | Cosine  | TER     | CHRF    | BLEU    |
|---------|---------|---------|---------|---------|---------|---------|---------|---------|---------|---------|---------|
| Distil  | 1.0000  | 0.4867  | 0.4998  | 0.5768  | 0.5399  | 0.6742  | 0.6742  | 0.6870  | -0.6367 | 0.6201  | 0.6265  |
| MiniLM  | 0.4867  | 1.0000  | 0.7692  | 0.4185  | 0.4356  | 0.5105  | 0.5105  | 0.5051  | -0.4937 | 0.4738  | 0.4790  |
| Mpnet   | 0.4998  | 0.7692  | 1.0000  | 0.4317  | 0.4276  | 0.5082  | 0.5082  | 0.5060  | -0.4887 | 0.4732  | 0.4787  |
| Roberta | 0.5768  | 0.4185  | 0.4317  | 1.0000  | 0.4795  | 0.5827  | 0.5827  | 0.5870  | -0.5524 | 0.5389  | 0.5442  |
| Leven   | 0.5399  | 0.4356  | 0.4276  | 0.4795  | 1.0000  | 0.6360  | 0.6360  | 0.6179  | -0.7908 | 0.6920  | 0.7073  |
| Jaccard | 0.6742  | 0.5105  | 0.5082  | 0.5827  | 0.6360  | 1.0000  | 1.0000  | 0.8375  | -0.7670 | 0.7173  | 0.7234  |
| Dice    | 0.6742  | 0.5105  | 0.5082  | 0.5827  | 0.6360  | 1.0000  | 1.0000  | 0.8375  | -0.7670 | 0.7173  | 0.7234  |
| Cosine  | 0.6870  | 0.5051  | 0.5060  | 0.5870  | 0.6179  | 0.8375  | 0.8375  | 1.0000  | -0.7496 | 0.7185  | 0.7235  |
| TER     | -0.6367 | -0.4937 | -0.4887 | -0.5524 | -0.7908 | -0.7670 | -0.7670 | -0.7496 | 1.0000  | -0.7448 | -0.7780 |
| CHRF    | 0.6201  | 0.4738  | 0.4732  | 0.5389  | 0.6920  | 0.7173  | 0.7173  | 0.7185  | -0.7448 | 1.0000  | 0.9259  |
| BLEU    | 0.6265  | 0.4790  | 0.4787  | 0.5442  | 0.7073  | 0.7234  | 0.7234  | 0.7235  | -0.7780 | 0.9259  | 1.0000  |

| MyaZho  | Distil  | MiniLM  | Mpnet   | Roberta | Leven   | Jaccard | Dice    | Cosine  | TER     | CHRF    | BLEU    |
|---------|---------|---------|---------|---------|---------|---------|---------|---------|---------|---------|---------|
| Distil  | 1.0000  | 0.4439  | 0.4541  | 0.4881  | 0.4646  | 0.6359  | 0.6359  | 0.6442  | -0.5731 | 0.5842  | 0.5744  |
| MiniLM  | 0.4439  | 1.0000  | 0.7362  | 0.3514  | 0.3698  | 0.4780  | 0.4780  | 0.4712  | -0.4385 | 0.4397  | 0.4339  |
| Mpnet   | 0.4541  | 0.7362  | 1.0000  | 0.3690  | 0.3584  | 0.4746  | 0.4746  | 0.4705  | -0.4302 | 0.4372  | 0.4312  |
| Roberta | 0.4881  | 0.3514  | 0.3690  | 1.0000  | 0.3791  | 0.5006  | 0.5006  | 0.5025  | -0.4560 | 0.4628  | 0.4557  |
| Leven   | 0.4646  | 0.3698  | 0.3584  | 0.3791  | 1.0000  | 0.5625  | 0.5625  | 0.5384  | -0.7218 | 0.5945  | 0.6027  |
| Jaccard | 0.6359  | 0.4780  | 0.4746  | 0.5006  | 0.5625  | 1.0000  | 1.0000  | 0.8217  | -0.7078 | 0.7011  | 0.6799  |
| Dice    | 0.6359  | 0.4780  | 0.4746  | 0.5006  | 0.5625  | 1.0000  | 1.0000  | 0.8217  | -0.7078 | 0.7011  | 0.6799  |
| Cosine  | 0.6442  | 0.4712  | 0.4705  | 0.5025  | 0.5384  | 0.8217  | 0.8217  | 1.0000  | -0.6797 | 0.6872  | 0.6622  |
| TER     | -0.5731 | -0.4385 | -0.4302 | -0.4560 | -0.7218 | -0.7078 | -0.7078 | -0.6797 | 1.0000  | -0.6726 | -0.6956 |
| CHRF    | 0.5842  | 0.4397  | 0.4372  | 0.4628  | 0.5945  | 0.7011  | 0.7011  | 0.6872  | -0.6726 | 1.0000  | 0.9035  |
| BLEU    | 0.5744  | 0.4339  | 0.4312  | 0.4557  | 0.6027  | 0.6799  | 0.6799  | 0.6622  | -0.6956 | 0.9035  | 1.0000  |

| PolZho  | Distil  | MiniLM  | Mpnet   | Roberta | Leven   | Jaccard | Dice    | Cosine | TER     | CHRF    | BLEU    |
|---------|---------|---------|---------|---------|---------|---------|---------|--------|---------|---------|---------|
| Distil  | 1.0000  | 0.4600  | 0.4788  | 0.5422  | 0.5000  | 0.6476  | 0.6476  | 0.6635 | -0.6055 | 0.6007  | 0.6031  |
| Distil  | 1.0000  | 0.4600  | 0.4788  | 0.5422  | 0.5000  | 0.6476  | 0.6476  | 0.6635 | -0.6055 | 0.6007  | 0.6031  |
| MiniLM  | 0.4600  | 1.0000  | 0.7464  | 0.3883  | 0.3983  | 0.4874  | 0.4874  | 0.4825 | -0.4637 | 0.4493  | 0.4522  |
| Mpnet   | 0.4788  | 0.7464  | 1.0000  | 0.4070  | 0.3932  | 0.4897  | 0.4897  | 0.4880 | -0.4622 | 0.4548  | 0.4573  |
| Roberta | 0.5422  | 0.3883  | 0.4070  | 1.0000  | 0.4305  | 0.5479  | 0.5479  | 0.5548 | -0.5103 | 0.5087  | 0.5104  |
| Leven   | 0.5000  | 0.3983  | 0.3932  | 0.4305  | 1.0000  | 0.5978  | 0.5978  | 0.5757 | -0.7667 | 0.6466  | 0.6600  |
| Jaccard | 0.6476  | 0.4874  | 0.4897  | 0.5479  | 0.5978  | 1.0000  | 1.0000  | 0.8178 | -0.7407 | 0.7027  | 0.7022  |
| Dice    | 0.6476  | 0.4874  | 0.4897  | 0.5479  | 0.5978  | 1.0000  | 1.0000  | 0.8178 | -0.7407 | 0.7027  | 0.7022  |
| Cosine  | 0.6635  | 0.4825  | 0.4880  | 0.5548  | 0.5757  | 0.8178  | 0.8178  | 1.0000 | -0.7189 | 0.7029  | 0.7009  |
| TER     | -0.6055 | -0.4637 | -0.4622 | -0.5103 | -0.7667 | -0.7407 | -0.7407 | 1.0000 | -0.7173 | -0.7466 | -0.7466 |
| CHRF    | 0.6007  | 0.4493  | 0.4548  | 0.5087  | 0.6466  | 0.7027  | 0.7027  | 0.7029 | -0.7173 | 1.0000  | 0.9227  |
| BLEU    | 0.6031  | 0.4522  | 0.4573  | 0.5104  | 0.6600  | 0.7022  | 0.7022  | 0.7009 | -0.7466 | 0.9227  | 1.0000  |

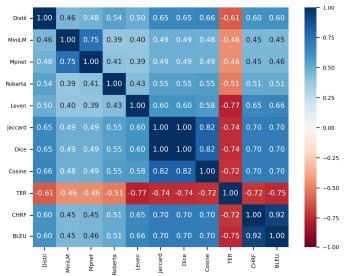

| RusZho  | Distil  | MiniLM  | Mpnet   | Roberta | Leven   | Jaccard | Dice    | Cosine  | TER     | CHRF    | BLEU    |
|---------|---------|---------|---------|---------|---------|---------|---------|---------|---------|---------|---------|
| Distil  | 1.0000  | 0.4844  | 0.4990  | 0.5371  | 0.5015  | 0.6416  | 0.6416  | 0.6634  | -0.6032 | 0.6012  | 0.6076  |
| Distil  | 1.0000  | 0.4844  | 0.4990  | 0.5371  | 0.5015  | 0.6416  | 0.6416  | 0.6634  | -0.6032 | 0.6012  | 0.6076  |
| MiniLM  | 0.4844  | 1.0000  | 0.7223  | 0.4041  | 0.4184  | 0.5125  | 0.5125  | 0.5093  | -0.4864 | 0.4808  | 0.4851  |
| Mpnet   | 0.4990  | 0.7223  | 1.0000  | 0.4245  | 0.4087  | 0.5081  | 0.5081  | 0.5110  | -0.4789 | 0.4774  | 0.4818  |
| Roberta | 0.5371  | 0.4041  | 0.4245  | 1.0000  | 0.4177  | 0.5269  | 0.5269  | 0.5404  | -0.4909 | 0.4890  | 0.4938  |
| Leven   | 0.5015  | 0.4184  | 0.4087  | 0.4177  | 1.0000  | 0.5938  | 0.5938  | 0.5705  | -0.7421 | 0.6407  | 0.6505  |
| Jaccard | 0.6416  | 0.5125  | 0.5081  | 0.5269  | 0.5938  | 1.0000  | 1.0000  | 0.8097  | -0.7383 | 0.7170  | 0.7204  |
| Dice    | 0.6416  | 0.5125  | 0.5081  | 0.5269  | 0.5938  | 1.0000  | 1.0000  | 0.8097  | -0.7383 | 0.7170  | 0.7204  |
| Cosine  | 0.6634  | 0.5093  | 0.5110  | 0.5404  | 0.5705  | 0.8097  | 0.8097  | 1.0000  | -0.7144 | 0.7129  | 0.7150  |
| TER     | -0.6032 | -0.4864 | -0.4789 | -0.4909 | -0.7421 | -0.7383 | -0.7383 | -0.7144 | 1.0000  | -0.7130 | -0.7481 |
| CHRF    | 0.6012  | 0.4808  | 0.4774  | 0.4890  | 0.6407  | 0.7170  | 0.7170  | 0.7129  | -0.7130 | 1.0000  | 0.9200  |
| BLEU    | 0.6076  | 0.4851  | 0.4818  | 0.4938  | 0.6505  | 0.7204  | 0.7204  | 0.7150  | -0.7481 | 0.9200  | 1.0000  |

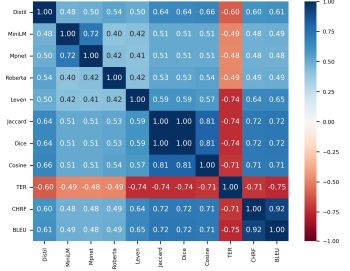

| SlkZho  | Distil  | MiniLM  | Mpnet   | Roberta | Leven   | Jaccard | Dice    | Cosine  | TER     | CHRF    | BLEU    |
|---------|---------|---------|---------|---------|---------|---------|---------|---------|---------|---------|---------|
| Distil  | 1.0000  | 0.4558  | 0.4755  | 0.5419  | 0.4938  | 0.6459  | 0.6459  | 0.6615  | -0.6016 | 0.5969  | 0.5993  |
| Distil  | 1.0000  | 0.4558  | 0.4755  | 0.5419  | 0.4938  | 0.6459  | 0.6459  | 0.6615  | -0.6016 | 0.5969  | 0.5993  |
| MiniLM  | 0.4558  | 1.0000  | 0.7465  | 0.3842  | 0.3952  | 0.4857  | 0.4857  | 0.4802  | -0.4614 | 0.4452  | 0.4481  |
| Mpnet   | 0.4755  | 0.7465  | 1.0000  | 0.4049  | 0.3891  | 0.4876  | 0.4876  | 0.4854  | -0.4590 | 0.4508  | 0.4534  |
| Roberta | 0.5419  | 0.3842  | 0.4049  | 1.0000  | 0.4259  | 0.5450  | 0.5450  | 0.5523  | -0.5064 | 0.5068  | 0.5086  |
| Leven   | 0.4938  | 0.3952  | 0.3891  | 0.4259  | 1.0000  | 0.5930  | 0.5930  | 0.5711  | -0.7636 | 0.6398  | 0.6528  |
| Jaccard | 0.6459  | 0.4857  | 0.4876  | 0.5450  | 0.5930  | 1.0000  | 1.0000  | 0.8172  | -0.7389 | 0.7000  | 0.6997  |
| Dice    | 0.6459  | 0.4857  | 0.4876  | 0.5450  | 0.5930  | 1.0000  | 1.0000  | 0.8172  | -0.7389 | 0.7000  | 0.6997  |
| Cosine  | 0.6615  | 0.4802  | 0.4854  | 0.5523  | 0.5711  | 0.8172  | 0.8172  | 1.0000  | -0.7170 | 0.7002  | 0.6984  |
| TER     | -0.6016 | -0.4614 | -0.4590 | -0.5064 | -0.7636 | -0.7389 | -0.7389 | -0.7170 | 1.0000  | -0.7128 | -0.7420 |
| CHRF    | 0.5969  | 0.4452  | 0.4508  | 0.5068  | 0.6398  | 0.7000  | 0.7000  | 0.7002  | -0.7128 | 1.0000  | 0.9222  |
| BLEU    | 0.5993  | 0.4481  | 0.4534  | 0.5086  | 0.6528  | 0.6997  | 0.6997  | 0.6984  | -0.7420 | 0.9222  | 1.0000  |

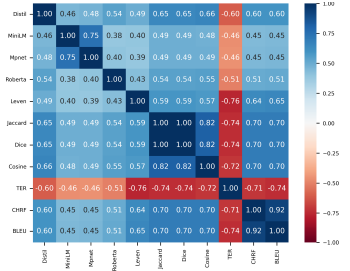

| SpaZho  | Distil  | MiniLM  | Mpnet   | Roberta | Leven   | Jaccard | Dice    | Cosine  | TER     | CHRF    | BLEU    |
|---------|---------|---------|---------|---------|---------|---------|---------|---------|---------|---------|---------|
| Distil  | 1.0000  | 0.4223  | 0.4493  | 0.4788  | 0.4363  | 0.5747  | 0.5747  | 0.5989  | -0.5421 | 0.5192  | 0.5309  |
| Distil  | 1.0000  | 0.4223  | 0.4493  | 0.4788  | 0.4363  | 0.5747  | 0.5747  | 0.5989  | -0.5421 | 0.5192  | 0.5309  |
| MiniLM  | 0.4223  | 1.0000  | 0.6889  | 0.3405  | 0.3512  | 0.4484  | 0.4484  | 0.4458  | -0.4238 | 0.4061  | 0.4136  |
| Mpnet   | 0.4493  | 0.6889  | 1.0000  | 0.3587  | 0.3458  | 0.4450  | 0.4450  | 0.4466  | -0.4197 | 0.4026  | 0.4109  |
| Roberta | 0.4788  | 0.3405  | 0.3587  | 1.0000  | 0.3533  | 0.4776  | 0.4776  | 0.4880  | -0.4317 | 0.4241  | 0.4321  |
| Leven   | 0.4363  | 0.3512  | 0.3458  | 0.3533  | 1.0000  | 0.5423  | 0.5423  | 0.5169  | -0.7312 | 0.6044  | 0.6196  |
| Jaccard | 0.5747  | 0.4484  | 0.4450  | 0.4776  | 0.5423  | 1.0000  | 1.0000  | 0.7771  | -0.7030 | 0.6664  | 0.6760  |
| Dice    | 0.5747  | 0.4484  | 0.4450  | 0.4776  | 0.5423  | 1.0000  | 1.0000  | 0.7771  | -0.7030 | 0.6664  | 0.6760  |
| Cosine  | 0.5989  | 0.4458  | 0.4466  | 0.4880  | 0.5169  | 0.7771  | 0.7771  | 1.0000  | -0.6741 | 0.6657  | 0.6729  |
| TER     | -0.5421 | -0.4238 | -0.4197 | -0.4317 | -0.7312 | -0.7030 | -0.7030 | -0.6741 | 1.0000  | -0.6796 | -0.7222 |
| CHRF    | 0.5192  | 0.4061  | 0.4026  | 0.4241  | 0.6044  | 0.6664  | 0.6664  | 0.6657  | -0.6796 | 1.0000  | 0.9119  |
| BLEU    | 0.5309  | 0.4136  | 0.4109  | 0.4321  | 0.6196  | 0.6760  | 0.6760  | 0.6729  | -0.7222 | 0.9119  | 1.0000  |

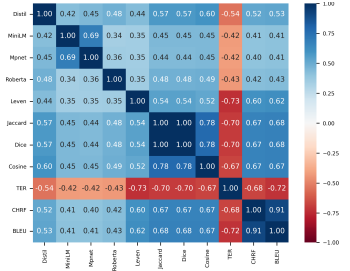

| ThaZho  | Distil  | MiniLM  | Mpnet   | Roberta | Leven   | Jaccard | Dice    | Cosine  | TER     | CHRF    | BLEU    |
|---------|---------|---------|---------|---------|---------|---------|---------|---------|---------|---------|---------|
| Distil  | 1.0000  | 0.4387  | 0.4553  | 0.5025  | 0.4640  | 0.6256  | 0.6256  | 0.6430  | -0.5771 | 0.5759  | 0.5735  |
| Distil  | 1.0000  | 0.4387  | 0.4553  | 0.5025  | 0.4640  | 0.6256  | 0.6256  | 0.6430  | -0.5771 | 0.5759  | 0.5735  |
| MiniLM  | 0.4387  | 1.0000  | 0.7243  | 0.3573  | 0.3667  | 0.4693  | 0.4693  | 0.4640  | -0.4384 | 0.4330  | 0.4317  |
| Mpnet   | 0.4553  | 0.7243  | 1.0000  | 0.3772  | 0.3599  | 0.4698  | 0.4698  | 0.4686  | -0.4347 | 0.4344  | 0.4330  |
| Roberta | 0.5025  | 0.3573  | 0.3772  | 1.0000  | 0.3834  | 0.5115  | 0.5115  | 0.5183  | -0.4688 | 0.4697  | 0.4683  |
| Leven   | 0.4640  | 0.3667  | 0.3599  | 0.3834  | 1.0000  | 0.5605  | 0.5605  | 0.5386  | -0.7365 | 0.6148  | 0.6237  |
| Jaccard | 0.6256  | 0.4693  | 0.4698  | 0.5115  | 0.5605  | 1.0000  | 1.0000  | 0.7997  | -0.7161 | 0.6890  | 0.6793  |
| Dice    | 0.6256  | 0.4693  | 0.4698  | 0.5115  | 0.5605  | 1.0000  | 1.0000  | 0.7997  | -0.7161 | 0.6890  | 0.6793  |
| Cosine  | 0.6430  | 0.4640  | 0.4686  | 0.5183  | 0.5386  | 0.7997  | 0.7997  | 1.0000  | -0.6909 | 0.6795  | 0.6695  |
| TER     | -0.5771 | -0.4384 | -0.4347 | -0.4688 | -0.7365 | -0.7161 | -0.7161 | -0.6909 | 1.0000  | -0.6962 | -0.7203 |
| CHRF    | 0.5759  | 0.4330  | 0.4344  | 0.4697  | 0.6148  | 0.6890  | 0.6890  | 0.6795  | -0.6962 | 1.0000  | 0.9181  |
| BLEU    | 0.5735  | 0.4317  | 0.4330  | 0.4683  | 0.6237  | 0.6793  | 0.6793  | 0.6695  | -0.7203 | 0.9181  | 1.0000  |

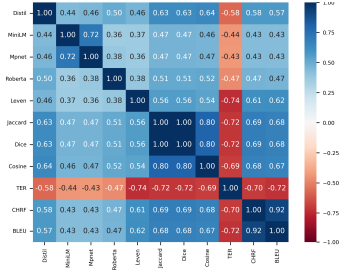

| UkrZho  | Distil  | MiniLM  | Mpnet   | Roberta | Leven   | Jaccard | Dice    | Cosine  | TER     | CHRF    | BLEU    |
|---------|---------|---------|---------|---------|---------|---------|---------|---------|---------|---------|---------|
| Distil  | 1.0000  | 0.4584  | 0.4777  | 0.5372  | 0.4983  | 0.6432  | 0.6432  | 0.6582  | -0.6019 | 0.5956  | 0.5985  |
| Distil  | 1.0000  | 0.4584  | 0.4777  | 0.5372  | 0.4983  | 0.6432  | 0.6432  | 0.6582  | -0.6019 | 0.5956  | 0.5985  |
| MiniLM  | 0.4584  | 1.0000  | 0.7441  | 0.3862  | 0.3983  | 0.4865  | 0.4865  | 0.4806  | -0.4638 | 0.4480  | 0.4511  |
| Mpnet   | 0.4777  | 0.7441  | 1.0000  | 0.4060  | 0.3931  | 0.4892  | 0.4892  | 0.4868  | -0.4620 | 0.4536  | 0.4566  |
| Roberta | 0.5372  | 0.3862  | 0.4060  | 1.0000  | 0.4279  | 0.5409  | 0.5409  | 0.5482  | -0.5048 | 0.5020  | 0.5039  |
| Leven   | 0.4983  | 0.3983  | 0.3931  | 0.4279  | 1.0000  | 0.5968  | 0.5968  | 0.5747  | -0.7675 | 0.6467  | 0.6598  |
| Jaccard | 0.6432  | 0.4865  | 0.4892  | 0.5409  | 0.5968  | 1.0000  | 1.0000  | 0.8125  | -0.7394 | 0.6991  | 0.6994  |
| Dice    | 0.6432  | 0.4865  | 0.4892  | 0.5409  | 0.5968  | 1.0000  | 1.0000  | 0.8125  | -0.7394 | 0.6991  | 0.6994  |
| Cosine  | 0.6582  | 0.4806  | 0.4868  | 0.5482  | 0.5747  | 0.8125  | 0.8125  | 1.0000  | -0.7169 | 0.6993  | 0.6981  |
| TER     | -0.6019 | -0.4638 | -0.4620 | -0.5048 | -0.7675 | -0.7394 | -0.7394 | -0.7169 | 1.0000  | -0.7157 | -0.7450 |
| CHRF    | 0.5956  | 0.4480  | 0.4536  | 0.5020  | 0.6467  | 0.6991  | 0.6991  | 0.6993  | -0.7157 | 1.0000  | 0.9230  |
| BLEU    | 0.5985  | 0.4511  | 0.4566  | 0.5039  | 0.6598  | 0.6994  | 0.6994  | 0.6981  | -0.7450 | 0.9230  | 1.0000  |

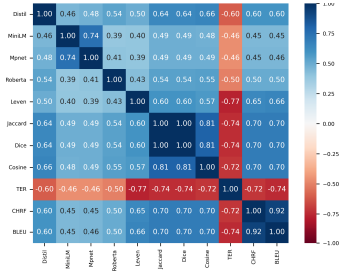

| VieZho  | Distil  | MiniLM  | Mpnet   | Roberta | Leven   | Jaccard | Dice    | Cosine  | TER     | CHRF    | BLEU    |
|---------|---------|---------|---------|---------|---------|---------|---------|---------|---------|---------|---------|
| Distil  | 1.0000  | 0.4609  | 0.4806  | 0.5446  | 0.4898  | 0.6485  | 0.6485  | 0.6630  | -0.5999 | 0.5998  | 0.5993  |
| MiniLM  | 0.4609  | 1.0000  | 0.7486  | 0.3874  | 0.3954  | 0.4883  | 0.4883  | 0.4838  | -0.4627 | 0.4493  | 0.4505  |
| Mpnet   | 0.4806  | 0.7486  | 1.0000  | 0.4074  | 0.3894  | 0.4917  | 0.4917  | 0.4900  | -0.4613 | 0.4557  | 0.4565  |
| Roberta | 0.5446  | 0.3874  | 0.4074  | 1.0000  | 0.4191  | 0.5450  | 0.5450  | 0.5514  | -0.5039 | 0.5055  | 0.5051  |
| Leven   | 0.4898  | 0.3954  | 0.3894  | 0.4191  | 1.0000  | 0.5927  | 0.5927  | 0.5702  | -0.7587 | 0.6415  | 0.6533  |
| Jaccard | 0.6485  | 0.4883  | 0.4917  | 0.5450  | 0.5927  | 1.0000  | 1.0000  | 0.8175  | -0.7397 | 0.7030  | 0.6993  |
| Dice    | 0.6485  | 0.4883  | 0.4917  | 0.5450  | 0.5927  | 1.0000  | 1.0000  | 0.8175  | -0.7397 | 0.7030  | 0.6993  |
| Cosine  | 0.6630  | 0.4838  | 0.4900  | 0.5514  | 0.5702  | 0.8175  | 0.8175  | 1.0000  | -0.7169 | 0.7018  | 0.6967  |
| TER     | -0.5999 | -0.4627 | -0.4613 | -0.5039 | -0.7587 | -0.7397 | -0.7397 | -0.7169 | 1.0000  | -0.7146 | -0.7418 |
| CHRF    | 0.5998  | 0.4493  | 0.4557  | 0.5055  | 0.6415  | 0.7030  | 0.7030  | 0.7018  | -0.7146 | 1.0000  | 0.9221  |
| BLEU    | 0.5993  | 0.4505  | 0.4565  | 0.5051  | 0.6533  | 0.6993  | 0.6993  | 0.6967  | -0.7418 | 0.9221  | 1.0000  |

3. Spearman Correlation Coefficient (XZho)

|         |         |         |         |         |         |         |         |         |         |         |         |                                                                                       |
|---------|---------|---------|---------|---------|---------|---------|---------|---------|---------|---------|---------|---------------------------------------------------------------------------------------|
| AraZho  | Distil  | MiniLM  | Mpnet   | Roberta | Leven   | Jaccard | Dice    | Cosine  | TER     | CHRF    | BLEU    |     |
| Distil  | 1.0000  | 0.6266  | 0.6513  | 0.7174  | 0.6574  | 0.8203  | 0.8203  | 0.8362  | -0.7775 | 0.7752  | 0.7800  |                                                                                       |
| MiniLM  | 0.6266  | 1.0000  | 0.8990  | 0.5332  | 0.5460  | 0.6641  | 0.6641  | 0.6589  | -0.6323 | 0.6132  | 0.6177  |                                                                                       |
| Mpnet   | 0.6513  | 0.8990  | 1.0000  | 0.5607  | 0.5396  | 0.6665  | 0.6665  | 0.6657  | -0.6301 | 0.6198  | 0.6241  |                                                                                       |
| Roberta | 0.7174  | 0.5332  | 0.5607  | 1.0000  | 0.5662  | 0.7119  | 0.7119  | 0.7221  | -0.6652 | 0.6656  | 0.6699  |                                                                                       |
| Leven   | 0.6574  | 0.5460  | 0.5396  | 0.5662  | 1.0000  | 0.7556  | 0.7556  | 0.7338  | -0.8933 | 0.8094  | 0.8174  |                                                                                       |
| Jaccard | 0.8203  | 0.6641  | 0.6665  | 0.7119  | 0.7556  | 1.0000  | 1.0000  | 0.9418  | -0.8983 | 0.8721  | 0.8744  |                                                                                       |
| Dice    | 0.8203  | 0.6641  | 0.6665  | 0.7119  | 0.7556  | 1.0000  | 1.0000  | 0.9418  | -0.8983 | 0.8721  | 0.8744  |                                                                                       |
| Cosine  | 0.8362  | 0.6589  | 0.6657  | 0.7221  | 0.7338  | 0.9418  | 0.9418  | 1.0000  | -0.8805 | 0.8727  | 0.8739  |                                                                                       |
| TER     | -0.7775 | -0.6323 | -0.6301 | -0.6652 | -0.8933 | -0.8983 | -0.8983 | -0.8805 | 1.0000  | -0.8776 | -0.9016 |                                                                                       |
| CHRF    | 0.7752  | 0.6132  | 0.6198  | 0.6656  | 0.8094  | 0.8721  | 0.8721  | 0.8727  | -0.8776 | 1.0000  | 0.9910  |                                                                                       |
| BLEU    | 0.7800  | 0.6177  | 0.6241  | 0.6699  | 0.8174  | 0.8744  | 0.8744  | 0.8739  | -0.9016 | 0.9910  | 1.0000  |                                                                                       |
| CesZho  | Distil  | MiniLM  | Mpnet   | Roberta | Leven   | Jaccard | Dice    | Cosine  | TER     | CHRF    | BLEU    |    |
| Distil  | 1.0000  | 0.6328  | 0.6547  | 0.7299  | 0.6767  | 0.8317  | 0.8317  | 0.8465  | -0.7914 | 0.7878  | 0.7914  |                                                                                       |
| MiniLM  | 0.6328  | 1.0000  | 0.9091  | 0.5404  | 0.5567  | 0.6650  | 0.6650  | 0.6596  | -0.6381 | 0.6191  | 0.6234  |                                                                                       |
| Mpnet   | 0.6547  | 0.9091  | 1.0000  | 0.5659  | 0.5485  | 0.6667  | 0.6667  | 0.6654  | -0.6343 | 0.6251  | 0.6292  |                                                                                       |
| Roberta | 0.7299  | 0.5404  | 0.5659  | 1.0000  | 0.5941  | 0.7298  | 0.7298  | 0.7390  | -0.6886 | 0.6882  | 0.6917  |                                                                                       |
| Leven   | 0.6767  | 0.5567  | 0.5485  | 0.5941  | 1.0000  | 0.7695  | 0.7695  | 0.7504  | -0.9024 | 0.8195  | 0.8275  |                                                                                       |
| Jaccard | 0.8317  | 0.6650  | 0.6667  | 0.7298  | 0.7695  | 1.0000  | 1.0000  | 0.9462  | -0.9044 | 0.8746  | 0.8759  |                                                                                       |
| Dice    | 0.8317  | 0.6650  | 0.6667  | 0.7298  | 0.7695  | 1.0000  | 1.0000  | 0.9462  | -0.9044 | 0.8746  | 0.8759  |                                                                                       |
| Cosine  | 0.8465  | 0.6596  | 0.6654  | 0.7390  | 0.7504  | 0.9462  | 0.9462  | 1.0000  | -0.8895 | 0.8758  | 0.8763  |                                                                                       |
| TER     | -0.7914 | -0.6381 | -0.6343 | -0.6886 | -0.9024 | -0.9044 | -0.9044 | -0.8895 | 1.0000  | -0.8852 | -0.9063 |                                                                                       |
| CHRF    | 0.7878  | 0.6191  | 0.6251  | 0.6882  | 0.8195  | 0.8746  | 0.8746  | 0.8758  | -0.8852 | 1.0000  | 0.9916  |                                                                                       |
| BLEU    | 0.7914  | 0.6234  | 0.6292  | 0.6917  | 0.8275  | 0.8759  | 0.8759  | 0.8763  | -0.9063 | 0.9916  | 1.0000  |                                                                                       |
| EngZho  | Distil  | MiniLM  | Mpnet   | Roberta | Leven   | Jaccard | Dice    | Cosine  | TER     | CHRF    | BLEU    |    |
| Distil  | 1.0000  | 0.6385  | 0.6669  | 0.7186  | 0.6739  | 0.8109  | 0.8109  | 0.8290  | -0.7817 | 0.7516  | 0.7625  |                                                                                       |
| MiniLM  | 0.6385  | 1.0000  | 0.9096  | 0.5497  | 0.5682  | 0.6662  | 0.6662  | 0.6561  | -0.6445 | 0.6097  | 0.6189  |                                                                                       |
| Mpnet   | 0.6669  | 0.9096  | 1.0000  | 0.5708  | 0.5624  | 0.6668  | 0.6668  | 0.6584  | -0.6430 | 0.6108  | 0.6210  |                                                                                       |
| Roberta | 0.7186  | 0.5497  | 0.5708  | 1.0000  | 0.6037  | 0.7310  | 0.7310  | 0.7350  | -0.6922 | 0.6748  | 0.6838  |                                                                                       |
| Leven   | 0.6739  | 0.5682  | 0.5624  | 0.6037  | 1.0000  | 0.7774  | 0.7774  | 0.7536  | -0.9055 | 0.8194  | 0.8314  |                                                                                       |
| Jaccard | 0.8109  | 0.6662  | 0.6668  | 0.7310  | 0.7774  | 1.0000  | 1.0000  | 0.9358  | -0.9051 | 0.8671  | 0.8736  |                                                                                       |
| Dice    | 0.8109  | 0.6662  | 0.6668  | 0.7310  | 0.7774  | 1.0000  | 1.0000  | 0.9358  | -0.9051 | 0.8671  | 0.8736  |                                                                                       |
| Cosine  | 0.8290  | 0.6561  | 0.6584  | 0.7350  | 0.7536  | 0.9358  | 0.9358  | 1.0000  | -0.8830 | 0.8676  | 0.8718  |                                                                                       |
| TER     | -0.7817 | -0.6445 | -0.6430 | -0.6922 | -0.9055 | -0.9051 | -0.9051 | -0.8830 | 1.0000  | -0.8759 | -0.9052 |                                                                                       |
| CHRF    | 0.7516  | 0.6097  | 0.6108  | 0.6748  | 0.8194  | 0.8671  | 0.8671  | 0.8676  | -0.8759 | 1.0000  | 0.9896  |                                                                                       |
| BLEU    | 0.7625  | 0.6189  | 0.6210  | 0.6838  | 0.8314  | 0.8736  | 0.8736  | 0.8718  | -0.9052 | 0.9896  | 1.0000  |                                                                                       |
| FilZho  | Distil  | MiniLM  | Mpnet   | Roberta | Leven   | Jaccard | Dice    | Cosine  | TER     | CHRF    | BLEU    |   |
| Distil  | 1.0000  | 0.6293  | 0.6521  | 0.7226  | 0.6685  | 0.8246  | 0.8246  | 0.8408  | -0.7860 | 0.7808  | 0.7864  |                                                                                       |
| MiniLM  | 0.6293  | 1.0000  | 0.9033  | 0.5368  | 0.5504  | 0.6622  | 0.6622  | 0.6585  | -0.6352 | 0.6171  | 0.6225  |                                                                                       |
| Mpnet   | 0.6521  | 0.9033  | 1.0000  | 0.5602  | 0.5447  | 0.6643  | 0.6643  | 0.6640  | -0.6335 | 0.6223  | 0.6276  |                                                                                       |
| Roberta | 0.7226  | 0.5368  | 0.5602  | 1.0000  | 0.5796  | 0.7217  | 0.7217  | 0.7290  | -0.6770 | 0.6751  | 0.6807  |                                                                                       |
| Leven   | 0.6685  | 0.5504  | 0.5447  | 0.5796  | 1.0000  | 0.7613  | 0.7613  | 0.7449  | -0.8981 | 0.8153  | 0.8237  |                                                                                       |
| Jaccard | 0.8246  | 0.6622  | 0.6643  | 0.7217  | 0.7613  | 1.0000  | 1.0000  | 0.9426  | -0.9019 | 0.8719  | 0.8756  |                                                                                       |
| Dice    | 0.8246  | 0.6622  | 0.6643  | 0.7217  | 0.7613  | 1.0000  | 1.0000  | 0.9426  | -0.9019 | 0.8719  | 0.8756  |                                                                                       |
| Cosine  | 0.8408  | 0.6585  | 0.6640  | 0.7290  | 0.7449  | 0.9426  | 0.9426  | 1.0000  | -0.8882 | 0.8738  | 0.8767  |                                                                                       |
| TER     | -0.7860 | -0.6352 | -0.6335 | -0.6770 | -0.8981 | -0.9019 | -0.9019 | -0.8882 | 1.0000  | -0.8834 | -0.9069 |                                                                                       |
| CHRF    | 0.7808  | 0.6171  | 0.6223  | 0.6751  | 0.8153  | 0.8719  | 0.8719  | 0.8738  | -0.8834 | 1.0000  | 0.9912  |                                                                                       |
| BLEU    | 0.7864  | 0.6225  | 0.6276  | 0.6807  | 0.8237  | 0.8756  | 0.8756  | 0.8767  | -0.9069 | 0.9912  | 1.0000  |                                                                                       |
| FraZho  | Distil  | MiniLM  | Mpnet   | Roberta | Leven   | Jaccard | Dice    | Cosine  | TER     | CHRF    | BLEU    |  |
| Distil  | 1.0000  | 0.6093  | 0.6435  | 0.6827  | 0.6177  | 0.7723  | 0.7723  | 0.7925  | -0.7318 | 0.7260  | 0.7332  |                                                                                       |
| MiniLM  | 0.6093  | 1.0000  | 0.8787  | 0.5053  | 0.5228  | 0.6430  | 0.6430  | 0.6377  | -0.6087 | 0.5925  | 0.5991  |                                                                                       |
| Mpnet   | 0.6435  | 0.8787  | 1.0000  | 0.5347  | 0.5122  | 0.6402  | 0.6402  | 0.6411  | -0.6023 | 0.5931  | 0.5998  |                                                                                       |
| Roberta | 0.6827  | 0.5053  | 0.5347  | 1.0000  | 0.5155  | 0.6727  | 0.6727  | 0.6857  | -0.6128 | 0.6225  | 0.6274  |                                                                                       |
| Leven   | 0.6177  | 0.5228  | 0.5122  | 0.5155  | 1.0000  | 0.7459  | 0.7459  | 0.7195  | -0.8824 | 0.7868  | 0.7949  |                                                                                       |
| Jaccard | 0.7723  | 0.6430  | 0.6402  | 0.6727  | 0.7459  | 1.0000  | 1.0000  | 0.9321  | -0.8860 | 0.8666  | 0.8689  |                                                                                       |
| Dice    | 0.7723  | 0.6430  | 0.6402  | 0.6727  | 0.7459  | 1.0000  | 1.0000  | 0.9321  | -0.8860 | 0.8666  | 0.8689  |                                                                                       |
| Cosine  | 0.7925  | 0.6377  | 0.6411  | 0.6857  | 0.7195  | 0.9321  | 0.9321  | 1.0000  | -0.8621 | 0.8687  | 0.8693  |                                                                                       |
| TER     | -0.7318 | -0.6087 | -0.6023 | -0.6128 | -0.8824 | -0.8860 | -0.8860 | -0.8621 | 1.0000  | -0.8543 | -0.8857 |                                                                                       |
| CHRF    | 0.7260  | 0.5925  | 0.5931  | 0.6225  | 0.7868  | 0.8666  | 0.8666  | 0.8687  | -0.8543 | 1.0000  | 0.9889  |                                                                                       |
| BLEU    | 0.7332  | 0.5991  | 0.5998  | 0.6274  | 0.7949  | 0.8689  | 0.8689  | 0.8693  | -0.8857 | 0.9889  | 1.0000  |                                                                                       |
| IndZho  | Distil  | MiniLM  | Mpnet   | Roberta | Leven   | Jaccard | Dice    | Cosine  | TER     | CHRF    | BLEU    |  |
| Distil  | 1.0000  | 0.6579  | 0.6718  | 0.7599  | 0.7193  | 0.8533  | 0.8533  | 0.8654  | -0.8190 | 0.8021  | 0.8101  |                                                                                       |
| MiniLM  | 0.6579  | 1.0000  | 0.9220  | 0.5752  | 0.5996  | 0.6883  | 0.6883  | 0.6832  | -0.6691 | 0.6426  | 0.6502  |                                                                                       |
| Mpnet   | 0.6718  | 0.9220  | 1.0000  | 0.5909  | 0.5899  | 0.6853  | 0.6853  | 0.6829  | -0.6626 | 0.6415  | 0.6493  |                                                                                       |
| Roberta | 0.7599  | 0.5752  | 0.5909  | 1.0000  | 0.6509  | 0.7655  | 0.7655  | 0.7711  | -0.7328 | 0.7162  | 0.7245  |                                                                                       |
| Leven   | 0.7193  | 0.5996  | 0.5899  | 0.6509  | 1.0000  | 0.8051  | 0.8051  | 0.7909  | -0.9184 | 0.8617  | 0.8701  |                                                                                       |
| Jaccard | 0.8533  | 0.6883  | 0.6853  | 0.7655  | 0.8051  | 1.0000  | 1.0000  | 0.9569  | -0.9211 | 0.8844  | 0.8912  |                                                                                       |
| Dice    | 0.8533  | 0.6883  | 0.6853  | 0.7655  | 0.8051  | 1.0000  | 1.0000  | 0.9569  | -0.9211 | 0.8844  | 0.8912  |                                                                                       |
| Cosine  | 0.8654  | 0.6832  | 0.6829  | 0.7711  | 0.7909  | 0.9569  | 0.9569  | 1.0000  | -0.9104 | 0.8864  | 0.8925  |                                                                                       |
| TER     | -0.8190 | -0.6691 | -0.6626 | -0.7328 | -0.9184 | -0.9211 | -0.9211 | -0.9104 | 1.0000  | -0.9053 | -0.9278 |                                                                                       |
| CHRF    | 0.8021  | 0.6426  | 0.6415  | 0.7162  | 0.8617  | 0.8844  | 0.8844  | 0.8864  | -0.9053 | 1.0000  | 0.9919  |                                                                                       |
| BLEU    | 0.8101  | 0.6502  | 0.6493  | 0.7245  | 0.8701  | 0.8912  | 0.8912  | 0.8925  | -0.9278 | 0.9919  | 1.0000  |                                                                                       |

| ItaZho  | Distil  | MiniLM  | Mpnet   | Roberta | Leven   | Jaccard | Dice    | Cosine  | TER     | CHRF    | BLEU    |
|---------|---------|---------|---------|---------|---------|---------|---------|---------|---------|---------|---------|
| Distil  | 1.0000  | 0.6504  | 0.6711  | 0.7556  | 0.7011  | 0.8486  | 0.8486  | 0.8615  | -0.8089 | 0.8071  | 0.8095  |
| MiniLM  | 0.6504  | 1.0000  | 0.9170  | 0.5633  | 0.5832  | 0.6820  | 0.6820  | 0.6770  | -0.6568 | 0.6375  | 0.6413  |
| Mpnet   | 0.6711  | 0.9170  | 1.0000  | 0.5884  | 0.5766  | 0.6852  | 0.6852  | 0.6838  | -0.6555 | 0.6444  | 0.6479  |
| Roberta | 0.7556  | 0.5633  | 0.5884  | 1.0000  | 0.6209  | 0.7546  | 0.7546  | 0.7638  | -0.7127 | 0.7136  | 0.7156  |
| Leven   | 0.7011  | 0.5832  | 0.5766  | 0.6209  | 1.0000  | 0.7910  | 0.7910  | 0.7737  | -0.9090 | 0.8369  | 0.8442  |
| Jaccard | 0.8486  | 0.6820  | 0.6852  | 0.7546  | 0.7910  | 1.0000  | 1.0000  | 0.9526  | -0.9128 | 0.8873  | 0.8878  |
| Dice    | 0.8486  | 0.6820  | 0.6852  | 0.7546  | 0.7910  | 1.0000  | 1.0000  | 0.9526  | -0.9128 | 0.8873  | 0.8878  |
| Cosine  | 0.8615  | 0.6770  | 0.6838  | 0.7638  | 0.7737  | 0.9526  | 0.9526  | 1.0000  | -0.8995 | 0.8884  | 0.8880  |
| TER     | -0.8089 | -0.6568 | -0.6555 | -0.7127 | -0.9090 | -0.9128 | -0.9128 | -0.8995 | 1.0000  | -0.8941 | -0.9146 |
| CHRF    | 0.8071  | 0.6375  | 0.6444  | 0.7136  | 0.8369  | 0.8873  | 0.8873  | 0.8884  | -0.8941 | 1.0000  | 0.9918  |
| BLEU    | 0.8095  | 0.6413  | 0.6479  | 0.7156  | 0.8442  | 0.8878  | 0.8878  | 0.8880  | -0.9146 | 0.9918  | 1.0000  |

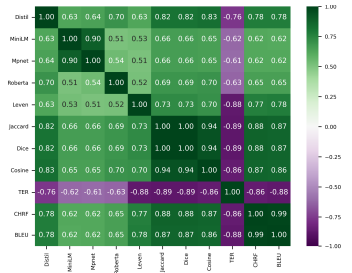

| KazZho  | Distil  | MiniLM  | Mpnet   | Roberta | Leven   | Jaccard | Dice    | Cosine  | TER     | CHRF    | BLEU    |
|---------|---------|---------|---------|---------|---------|---------|---------|---------|---------|---------|---------|
| Distil  | 1.0000  | 0.6251  | 0.6448  | 0.6962  | 0.6277  | 0.8172  | 0.8172  | 0.8299  | -0.7620 | 0.7788  | 0.7750  |
| MiniLM  | 0.6251  | 1.0000  | 0.8963  | 0.5134  | 0.5270  | 0.6598  | 0.6598  | 0.6514  | -0.6214 | 0.6179  | 0.6163  |
| Mpnet   | 0.6448  | 0.8963  | 1.0000  | 0.5391  | 0.5109  | 0.6581  | 0.6581  | 0.6539  | -0.6112 | 0.6201  | 0.6181  |
| Roberta | 0.6962  | 0.5134  | 0.5391  | 1.0000  | 0.5192  | 0.6898  | 0.6898  | 0.6959  | -0.6293 | 0.6525  | 0.6492  |
| Leven   | 0.6277  | 0.5270  | 0.5109  | 0.5192  | 1.0000  | 0.7300  | 0.7300  | 0.7048  | -0.8773 | 0.7711  | 0.7758  |
| Jaccard | 0.8172  | 0.6598  | 0.6581  | 0.6898  | 0.7300  | 1.0000  | 1.0000  | 0.9389  | -0.8860 | 0.8761  | 0.8677  |
| Dice    | 0.8172  | 0.6598  | 0.6581  | 0.6898  | 0.7300  | 1.0000  | 1.0000  | 0.9389  | -0.8860 | 0.8761  | 0.8677  |
| Cosine  | 0.8299  | 0.6514  | 0.6539  | 0.6959  | 0.7048  | 0.9389  | 0.9389  | 1.0000  | -0.8641 | 0.8722  | 0.8628  |
| TER     | -0.7620 | -0.6214 | -0.6112 | -0.6293 | -0.8773 | -0.8860 | -0.8860 | -0.8641 | 1.0000  | -0.8626 | -0.8807 |
| CHRF    | 0.7788  | 0.6179  | 0.6201  | 0.6525  | 0.7711  | 0.8761  | 0.8761  | 0.8722  | -0.8626 | 1.0000  | 0.9908  |
| BLEU    | 0.7750  | 0.6163  | 0.6181  | 0.6492  | 0.7758  | 0.8677  | 0.8677  | 0.8628  | -0.8807 | 0.9908  | 1.0000  |

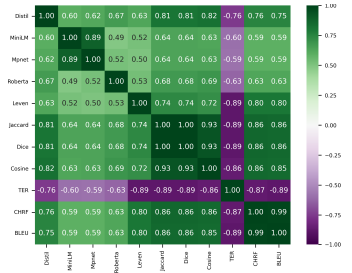

| KhmZho  | Distil  | MiniLM  | Mpnet   | Roberta | Leven   | Jaccard | Dice    | Cosine  | TER     | CHRF    | BLEU    |
|---------|---------|---------|---------|---------|---------|---------|---------|---------|---------|---------|---------|
| Distil  | 1.0000  | 0.5983  | 0.6179  | 0.6700  | 0.6320  | 0.8053  | 0.8053  | 0.8222  | -0.7562 | 0.7568  | 0.7549  |
| MiniLM  | 0.5983  | 1.0000  | 0.8885  | 0.4889  | 0.5158  | 0.6384  | 0.6384  | 0.6320  | -0.6006 | 0.5933  | 0.5912  |
| Mpnet   | 0.6179  | 0.8885  | 1.0000  | 0.5164  | 0.5024  | 0.6364  | 0.6364  | 0.6348  | -0.5919 | 0.5916  | 0.5899  |
| Roberta | 0.6700  | 0.4889  | 0.5164  | 1.0000  | 0.5263  | 0.6782  | 0.6782  | 0.6888  | -0.6273 | 0.6301  | 0.6289  |
| Leven   | 0.6320  | 0.5158  | 0.5024  | 0.5263  | 1.0000  | 0.7401  | 0.7401  | 0.7169  | -0.8864 | 0.7971  | 0.8016  |
| Jaccard | 0.8053  | 0.6384  | 0.6364  | 0.6782  | 0.7401  | 1.0000  | 1.0000  | 0.9333  | -0.8853 | 0.8646  | 0.8566  |
| Dice    | 0.8053  | 0.6384  | 0.6364  | 0.6782  | 0.7401  | 1.0000  | 1.0000  | 0.9333  | -0.8853 | 0.8646  | 0.8566  |
| Cosine  | 0.8222  | 0.6320  | 0.6348  | 0.6888  | 0.7169  | 0.9333  | 0.9333  | 1.0000  | -0.8642 | 0.8552  | 0.8470  |
| TER     | -0.7562 | -0.6006 | -0.5919 | -0.6273 | -0.8864 | -0.8853 | -0.8853 | -0.8642 | 1.0000  | -0.8679 | -0.8864 |
| CHRF    | 0.7568  | 0.5933  | 0.5916  | 0.6301  | 0.7971  | 0.8646  | 0.8646  | 0.8552  | -0.8679 | 1.0000  | 0.9904  |
| BLEU    | 0.7549  | 0.5912  | 0.5899  | 0.6289  | 0.8016  | 0.8566  | 0.8566  | 0.8470  | -0.8864 | 0.9904  | 1.0000  |

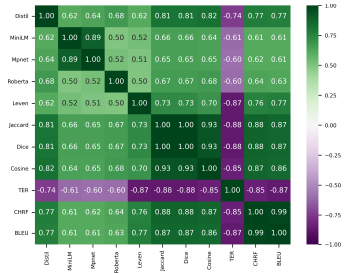

| KirZho  | Distil  | MiniLM  | Mpnet   | Roberta | Leven   | Jaccard | Dice    | Cosine  | TER     | CHRF    | BLEU    |
|---------|---------|---------|---------|---------|---------|---------|---------|---------|---------|---------|---------|
| Distil  | 1.0000  | 0.6165  | 0.6378  | 0.6797  | 0.6167  | 0.8076  | 0.8076  | 0.8212  | -0.7441 | 0.7735  | 0.7665  |
| MiniLM  | 0.6165  | 1.0000  | 0.8916  | 0.4950  | 0.5247  | 0.6553  | 0.6553  | 0.6446  | -0.6118 | 0.6147  | 0.6106  |
| Mpnet   | 0.6378  | 0.8916  | 1.0000  | 0.5220  | 0.5069  | 0.6537  | 0.6537  | 0.6469  | -0.6008 | 0.6163  | 0.6116  |
| Roberta | 0.6797  | 0.4950  | 0.5220  | 1.0000  | 0.4972  | 0.6694  | 0.6694  | 0.6776  | -0.6023 | 0.6351  | 0.6280  |
| Leven   | 0.6167  | 0.5247  | 0.5069  | 0.4972  | 1.0000  | 0.7301  | 0.7301  | 0.7013  | -0.8738 | 0.7619  | 0.7658  |
| Jaccard | 0.8076  | 0.6553  | 0.6537  | 0.6694  | 0.7301  | 1.0000  | 1.0000  | 0.9349  | -0.8760 | 0.8790  | 0.8660  |
| Dice    | 0.8076  | 0.6553  | 0.6537  | 0.6694  | 0.7301  | 1.0000  | 1.0000  | 0.9349  | -0.8760 | 0.8790  | 0.8660  |
| Cosine  | 0.8212  | 0.6446  | 0.6469  | 0.6776  | 0.7013  | 0.9349  | 0.9349  | 1.0000  | -0.8512 | 0.8717  | 0.8572  |
| TER     | -0.7441 | -0.6118 | -0.6008 | -0.6023 | -0.8738 | -0.8760 | -0.8760 | -0.8512 | 1.0000  | -0.8494 | -0.8678 |
| CHRF    | 0.7735  | 0.6147  | 0.6163  | 0.6351  | 0.7619  | 0.8790  | 0.8790  | 0.8717  | -0.8494 | 1.0000  | 0.9899  |
| BLEU    | 0.7665  | 0.6106  | 0.6116  | 0.6280  | 0.7658  | 0.8660  | 0.8660  | 0.8572  | -0.8678 | 0.9899  | 1.0000  |

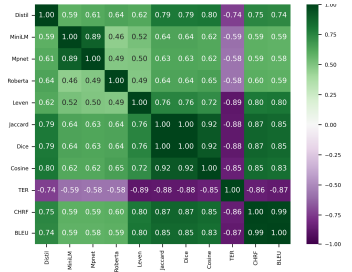

| LaoZho  | Distil  | MiniLM  | Mpnet   | Roberta | Leven   | Jaccard | Dice    | Cosine  | TER     | CHRF    | BLEU    |
|---------|---------|---------|---------|---------|---------|---------|---------|---------|---------|---------|---------|
| Distil  | 1.0000  | 0.5909  | 0.6109  | 0.6359  | 0.6239  | 0.7904  | 0.7904  | 0.8015  | -0.7369 | 0.7481  | 0.7400  |
| MiniLM  | 0.5909  | 1.0000  | 0.8868  | 0.4607  | 0.5190  | 0.6353  | 0.6353  | 0.6225  | -0.5942 | 0.5922  | 0.5859  |
| Mpnet   | 0.6109  | 0.8868  | 1.0000  | 0.4901  | 0.4974  | 0.6284  | 0.6284  | 0.6209  | -0.5793 | 0.5862  | 0.5800  |
| Roberta | 0.6359  | 0.4607  | 0.4901  | 1.0000  | 0.4922  | 0.6375  | 0.6375  | 0.6509  | -0.5816 | 0.6009  | 0.5918  |
| Leven   | 0.6239  | 0.5190  | 0.4974  | 0.4922  | 1.0000  | 0.7560  | 0.7560  | 0.7197  | -0.8900 | 0.7968  | 0.8002  |
| Jaccard | 0.7904  | 0.6353  | 0.6284  | 0.6375  | 0.7560  | 1.0000  | 1.0000  | 0.9195  | -0.8821 | 0.8688  | 0.8533  |
| Dice    | 0.7904  | 0.6353  | 0.6284  | 0.6375  | 0.7560  | 1.0000  | 1.0000  | 0.9195  | -0.8821 | 0.8688  | 0.8533  |
| Cosine  | 0.8015  | 0.6225  | 0.6209  | 0.6509  | 0.7197  | 0.9195  | 0.9195  | 1.0000  | -0.8492 | 0.8486  | 0.8298  |
| TER     | -0.7369 | -0.5942 | -0.5793 | -0.5816 | -0.8900 | -0.8821 | -0.8821 | -0.8492 | 1.0000  | -0.8584 | -0.8741 |
| CHRF    | 0.7481  | 0.5922  | 0.5862  | 0.6009  | 0.7968  | 0.8688  | 0.8688  | 0.8486  | -0.8584 | 1.0000  | 0.9888  |
| BLEU    | 0.7400  | 0.5859  | 0.5800  | 0.5918  | 0.8002  | 0.8533  | 0.8533  | 0.8298  | -0.8741 | 0.9888  | 1.0000  |

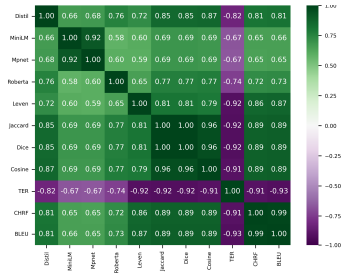

| MsaZho  | Distil  | MiniLM  | Mpnet   | Roberta | Leven   | Jaccard | Dice    | Cosine  | TER     | CHRF    | BLEU    |
|---------|---------|---------|---------|---------|---------|---------|---------|---------|---------|---------|---------|
| Distil  | 1.0000  | 0.6644  | 0.6785  | 0.7647  | 0.7217  | 0.8535  | 0.8535  | 0.8653  | -0.8207 | 0.8056  | 0.8127  |
| MiniLM  | 0.6644  | 1.0000  | 0.9217  | 0.5822  | 0.6040  | 0.6918  | 0.6918  | 0.6861  | -0.6724 | 0.6488  | 0.6552  |
| Mpnet   | 0.6785  | 0.9217  | 1.0000  | 0.5977  | 0.5938  | 0.6884  | 0.6884  | 0.6863  | -0.6660 | 0.6473  | 0.6542  |
| Roberta | 0.7647  | 0.5822  | 0.5977  | 1.0000  | 0.6544  | 0.7681  | 0.7681  | 0.7736  | -0.7357 | 0.7207  | 0.7278  |
| Leven   | 0.7217  | 0.6040  | 0.5938  | 0.6544  | 1.0000  | 0.8080  | 0.8080  | 0.7937  | -0.9187 | 0.8629  | 0.8707  |
| Jaccard | 0.8535  | 0.6918  | 0.6884  | 0.7681  | 0.8080  | 1.0000  | 1.0000  | 0.9564  | -0.9224 | 0.8868  | 0.8926  |
| Dice    | 0.8535  | 0.6918  | 0.6884  | 0.7681  | 0.8080  | 1.0000  | 1.0000  | 0.9564  | -0.9224 | 0.8868  | 0.8926  |
| Cosine  | 0.8653  | 0.6861  | 0.6863  | 0.7736  | 0.7937  | 0.9564  | 0.9564  | 1.0000  | -0.9119 | 0.8894  | 0.8946  |
| TER     | -0.8207 | -0.6724 | -0.6660 | -0.7357 | -0.9187 | -0.9224 | -0.9224 | -0.9119 | 1.0000  | -0.9069 | -0.9283 |
| CHRF    | 0.8056  | 0.6488  | 0.6473  | 0.7207  | 0.8629  | 0.8868  | 0.8868  | 0.8894  | -0.9069 | 1.0000  | 0.9921  |
| BLEU    | 0.8127  | 0.6552  | 0.6542  | 0.7278  | 0.8707  | 0.8926  | 0.8926  | 0.8946  | -0.9283 | 0.9921  | 1.0000  |

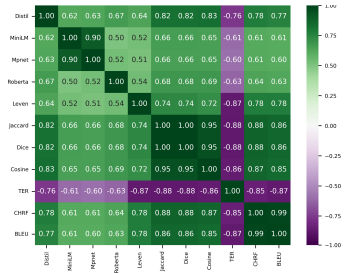

| MyaZho  | Distil  | MiniLM  | Mpnet   | Roberta | Leven   | Jaccard | Dice    | Cosine  | TER     | CHRF    | BLEU    |
|---------|---------|---------|---------|---------|---------|---------|---------|---------|---------|---------|---------|
| Distil  | 1.0000  | 0.6201  | 0.6317  | 0.6714  | 0.6399  | 0.8236  | 0.8236  | 0.8321  | -0.7628 | 0.7753  | 0.7656  |
| MiniLM  | 0.6201  | 1.0000  | 0.9030  | 0.5021  | 0.5248  | 0.6598  | 0.6598  | 0.6524  | -0.6120 | 0.6141  | 0.6070  |
| Mpnet   | 0.6317  | 0.9030  | 1.0000  | 0.5246  | 0.5098  | 0.6553  | 0.6553  | 0.6510  | -0.6014 | 0.6104  | 0.6033  |
| Roberta | 0.6714  | 0.5021  | 0.5246  | 1.0000  | 0.5353  | 0.6833  | 0.6833  | 0.6864  | -0.6310 | 0.6390  | 0.6315  |
| Leven   | 0.6399  | 0.5248  | 0.5098  | 0.5353  | 1.0000  | 0.7395  | 0.7395  | 0.7175  | -0.8719 | 0.7759  | 0.7797  |
| Jaccard | 0.8236  | 0.6598  | 0.6553  | 0.6833  | 0.7395  | 1.0000  | 1.0000  | 0.9491  | -0.8805 | 0.8772  | 0.8608  |
| Dice    | 0.8236  | 0.6598  | 0.6553  | 0.6833  | 0.7395  | 1.0000  | 1.0000  | 0.9491  | -0.8805 | 0.8772  | 0.8608  |
| Cosine  | 0.8321  | 0.6524  | 0.6510  | 0.6864  | 0.7175  | 0.9491  | 0.9491  | 1.0000  | -0.8595 | 0.8675  | 0.8475  |
| TER     | -0.7628 | -0.6120 | -0.6014 | -0.6310 | -0.8719 | -0.8805 | -0.8805 | -0.8595 | 1.0000  | -0.8509 | -0.8707 |
| CHRF    | 0.7753  | 0.6141  | 0.6104  | 0.6390  | 0.7759  | 0.8772  | 0.8772  | 0.8675  | -0.8509 | 1.0000  | 0.9867  |
| BLEU    | 0.7656  | 0.6070  | 0.6033  | 0.6315  | 0.7797  | 0.8608  | 0.8608  | 0.8475  | -0.8707 | 0.9867  | 1.0000  |

| PolZho  | Distil  | MiniLM  | Mpnet   | Roberta | Leven   | Jaccard | Dice    | Cosine  | TER     | CHRF    | BLEU    |
|---------|---------|---------|---------|---------|---------|---------|---------|---------|---------|---------|---------|
| Distil  | 1.0000  | 0.6354  | 0.6566  | 0.7308  | 0.6796  | 0.8322  | 0.8322  | 0.8474  | -0.7932 | 0.7890  | 0.7921  |
| MiniLM  | 0.6354  | 1.0000  | 0.9084  | 0.5470  | 0.5594  | 0.6676  | 0.6676  | 0.6624  | -0.6396 | 0.6223  | 0.6260  |
| Mpnet   | 0.6566  | 0.9084  | 1.0000  | 0.5700  | 0.5528  | 0.6697  | 0.6697  | 0.6681  | -0.6373 | 0.6281  | 0.6315  |
| Roberta | 0.7308  | 0.5470  | 0.5700  | 1.0000  | 0.5980  | 0.7336  | 0.7336  | 0.7423  | -0.6918 | 0.6898  | 0.6929  |
| Leven   | 0.6796  | 0.5594  | 0.5528  | 0.5980  | 1.0000  | 0.7732  | 0.7732  | 0.7544  | -0.9040 | 0.8240  | 0.8319  |
| Jaccard | 0.8322  | 0.6676  | 0.6697  | 0.7336  | 0.7732  | 1.0000  | 1.0000  | 0.9468  | -0.9049 | 0.8768  | 0.8774  |
| Dice    | 0.8322  | 0.6676  | 0.6697  | 0.7336  | 0.7732  | 1.0000  | 1.0000  | 0.9468  | -0.9049 | 0.8768  | 0.8774  |
| Cosine  | 0.8474  | 0.6624  | 0.6681  | 0.7423  | 0.7544  | 0.9468  | 0.9468  | 1.0000  | -0.8905 | 0.8782  | 0.8781  |
| TER     | -0.7932 | -0.6396 | -0.6373 | -0.6918 | -0.9040 | -0.9049 | -0.9049 | -0.8905 | 1.0000  | -0.8871 | -0.9080 |
| CHRF    | 0.7890  | 0.6223  | 0.6281  | 0.6898  | 0.8240  | 0.8768  | 0.8768  | 0.8782  | -0.8871 | 1.0000  | 0.9916  |
| BLEU    | 0.7921  | 0.6260  | 0.6315  | 0.6929  | 0.8319  | 0.8774  | 0.8774  | 0.8781  | -0.9080 | 0.9916  | 1.0000  |

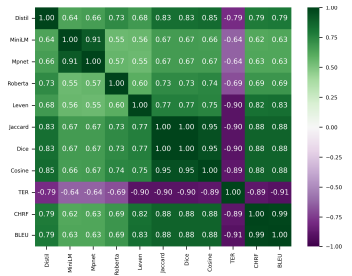

| RusZho  | Distil  | MiniLM  | Mpnet   | Roberta | Leven   | Jaccard | Dice    | Cosine  | TER     | CHRF    | BLEU    |
|---------|---------|---------|---------|---------|---------|---------|---------|---------|---------|---------|---------|
| Distil  | 1.0000  | 0.6621  | 0.6779  | 0.7227  | 0.6783  | 0.8240  | 0.8240  | 0.8443  | -0.7881 | 0.7857  | 0.7928  |
| MiniLM  | 0.6621  | 1.0000  | 0.8911  | 0.5658  | 0.5814  | 0.6935  | 0.6935  | 0.6905  | -0.6639 | 0.6565  | 0.6618  |
| Mpnet   | 0.6779  | 0.8911  | 1.0000  | 0.5904  | 0.5692  | 0.6880  | 0.6880  | 0.6918  | -0.6546 | 0.6518  | 0.6576  |
| Roberta | 0.7227  | 0.5658  | 0.5904  | 1.0000  | 0.5811  | 0.7091  | 0.7091  | 0.7244  | -0.6679 | 0.6649  | 0.6717  |
| Leven   | 0.6783  | 0.5814  | 0.5692  | 0.5811  | 1.0000  | 0.7667  | 0.7667  | 0.7469  | -0.8892 | 0.8145  | 0.8198  |
| Jaccard | 0.8240  | 0.6935  | 0.6880  | 0.7091  | 0.7667  | 1.0000  | 1.0000  | 0.9425  | -0.9015 | 0.8849  | 0.8888  |
| Dice    | 0.8240  | 0.6935  | 0.6880  | 0.7091  | 0.7667  | 1.0000  | 1.0000  | 0.9425  | -0.9015 | 0.8849  | 0.8888  |
| Cosine  | 0.8443  | 0.6905  | 0.6918  | 0.7244  | 0.7469  | 0.9425  | 0.9425  | 1.0000  | -0.8847 | 0.8831  | 0.8864  |
| TER     | -0.7881 | -0.6639 | -0.6546 | -0.6679 | -0.8892 | -0.9015 | -0.9015 | -0.8847 | 1.0000  | -0.8806 | -0.9072 |
| CHRF    | 0.7857  | 0.6565  | 0.6518  | 0.6649  | 0.8145  | 0.8849  | 0.8849  | 0.8831  | -0.8806 | 1.0000  | 0.9905  |
| BLEU    | 0.7928  | 0.6618  | 0.6576  | 0.6717  | 0.8198  | 0.8888  | 0.8888  | 0.8864  | -0.9072 | 0.9905  | 1.0000  |

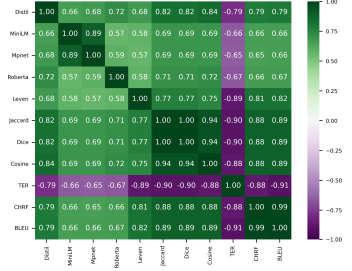

| SlkZho  | Distil  | MiniLM  | Mpnet   | Roberta | Leven   | Jaccard | Dice    | Cosine  | TER     | CHRF    | BLEU    |
|---------|---------|---------|---------|---------|---------|---------|---------|---------|---------|---------|---------|
| Distil  | 1.0000  | 0.6307  | 0.6531  | 0.7307  | 0.6727  | 0.8311  | 0.8311  | 0.8459  | -0.7896 | 0.7855  | 0.7888  |
| MiniLM  | 0.6307  | 1.0000  | 0.9084  | 0.5417  | 0.5557  | 0.6657  | 0.6657  | 0.6597  | -0.6369 | 0.6173  | 0.6210  |
| Mpnet   | 0.6531  | 0.9084  | 1.0000  | 0.5674  | 0.5478  | 0.6674  | 0.6674  | 0.6652  | -0.6337 | 0.6235  | 0.6270  |
| Roberta | 0.7307  | 0.5417  | 0.5674  | 1.0000  | 0.5926  | 0.7306  | 0.7306  | 0.7397  | -0.6876 | 0.6877  | 0.6910  |
| Leven   | 0.6727  | 0.5557  | 0.5478  | 0.5926  | 1.0000  | 0.7683  | 0.7683  | 0.7495  | -0.9014 | 0.8179  | 0.8257  |
| Jaccard | 0.8311  | 0.6657  | 0.6674  | 0.7306  | 0.7683  | 1.0000  | 1.0000  | 0.9464  | -0.9037 | 0.8745  | 0.8755  |
| Dice    | 0.8311  | 0.6657  | 0.6674  | 0.7306  | 0.7683  | 1.0000  | 1.0000  | 0.9464  | -0.9037 | 0.8745  | 0.8755  |
| Cosine  | 0.8459  | 0.6597  | 0.6652  | 0.7397  | 0.7495  | 0.9464  | 0.9464  | 1.0000  | -0.8890 | 0.8763  | 0.8763  |
| TER     | -0.7896 | -0.6369 | -0.6337 | -0.6876 | -0.9014 | -0.9037 | -0.9037 | -0.8890 | 1.0000  | -0.8836 | -0.9048 |
| CHRF    | 0.7855  | 0.6173  | 0.6235  | 0.6877  | 0.8179  | 0.8745  | 0.8745  | 0.8763  | -0.8836 | 1.0000  | 0.9915  |
| BLEU    | 0.7888  | 0.6210  | 0.6270  | 0.6910  | 0.8257  | 0.8755  | 0.8755  | 0.8763  | -0.9048 | 0.9915  | 1.0000  |

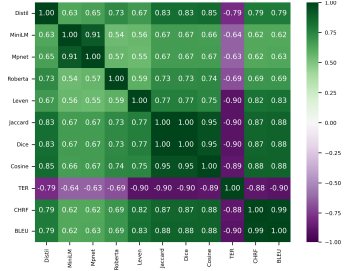

| SpaZho  | Distil  | MiniLM  | Mpnet   | Roberta | Leven   | Jaccard | Dice    | Cosine  | TER     | CHRF    | BLEU    |
|---------|---------|---------|---------|---------|---------|---------|---------|---------|---------|---------|---------|
| Distil  | 1.0000  | 0.5921  | 0.6231  | 0.6585  | 0.6060  | 0.7617  | 0.7617  | 0.7858  | -0.7281 | 0.7022  | 0.7161  |
| MiniLM  | 0.5921  | 1.0000  | 0.8661  | 0.4857  | 0.5002  | 0.6237  | 0.6237  | 0.6209  | -0.5932 | 0.5708  | 0.5805  |
| Mpnet   | 0.6231  | 0.8661  | 1.0000  | 0.5090  | 0.4930  | 0.6191  | 0.6191  | 0.6212  | -0.5874 | 0.5656  | 0.5764  |
| Roberta | 0.6585  | 0.4857  | 0.5090  | 1.0000  | 0.5013  | 0.6549  | 0.6549  | 0.6679  | -0.5996 | 0.5893  | 0.6002  |
| Leven   | 0.6060  | 0.5002  | 0.4930  | 0.5013  | 1.0000  | 0.7175  | 0.7175  | 0.6934  | -0.8802 | 0.7840  | 0.7942  |
| Jaccard | 0.7617  | 0.6237  | 0.6191  | 0.6549  | 0.7175  | 1.0000  | 1.0000  | 0.9242  | -0.8778 | 0.8487  | 0.8576  |
| Dice    | 0.7617  | 0.6237  | 0.6191  | 0.6549  | 0.7175  | 1.0000  | 1.0000  | 0.9242  | -0.8778 | 0.8487  | 0.8576  |
| Cosine  | 0.7858  | 0.6209  | 0.6212  | 0.6679  | 0.6934  | 0.9242  | 0.9242  | 1.0000  | -0.8551 | 0.8492  | 0.8564  |
| TER     | -0.7281 | -0.5932 | -0.5874 | -0.5996 | -0.8802 | -0.8778 | -0.8778 | -0.8551 | 1.0000  | -0.8570 | -0.8909 |
| CHRF    | 0.7022  | 0.5708  | 0.5656  | 0.5893  | 0.7840  | 0.8487  | 0.8487  | 0.8492  | -0.8570 | 1.0000  | 0.9884  |
| BLEU    | 0.7161  | 0.5805  | 0.5764  | 0.6002  | 0.7942  | 0.8576  | 0.8576  | 0.8564  | -0.8909 | 0.9884  | 1.0000  |

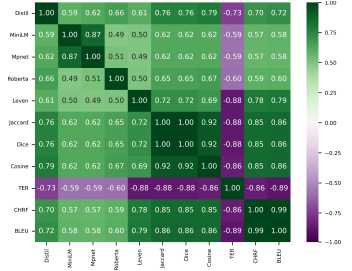

| ThaZho  | Distil  | MiniLM  | Mpnet   | Roberta | Leven   | Jaccard | Dice    | Cosine  | TER     | CHRF    | BLEU    |
|---------|---------|---------|---------|---------|---------|---------|---------|---------|---------|---------|---------|
| Distil  | 1.0000  | 0.6129  | 0.6321  | 0.6888  | 0.6400  | 0.8138  | 0.8138  | 0.8307  | -0.7669 | 0.7656  | 0.7641  |
| MiniLM  | 0.6129  | 1.0000  | 0.8946  | 0.5099  | 0.5207  | 0.6487  | 0.6487  | 0.6431  | -0.6111 | 0.6050  | 0.6037  |
| Mpnet   | 0.6321  | 0.8946  | 1.0000  | 0.5352  | 0.5117  | 0.6488  | 0.6488  | 0.6480  | -0.6061 | 0.6061  | 0.6048  |
| Roberta | 0.6888  | 0.5099  | 0.5352  | 1.0000  | 0.5412  | 0.6963  | 0.6963  | 0.7050  | -0.6464 | 0.6469  | 0.6464  |
| Leven   | 0.6400  | 0.5207  | 0.5117  | 0.5412  | 1.0000  | 0.7388  | 0.7388  | 0.7190  | -0.8861 | 0.7965  | 0.8013  |
| Jaccard | 0.8138  | 0.6487  | 0.6488  | 0.6963  | 0.7388  | 1.0000  | 1.0000  | 0.9378  | -0.8883 | 0.8669  | 0.8603  |
| Dice    | 0.8138  | 0.6487  | 0.6488  | 0.6963  | 0.7388  | 1.0000  | 1.0000  | 0.9378  | -0.8883 | 0.8669  | 0.8603  |
| Cosine  | 0.8307  | 0.6431  | 0.6480  | 0.7050  | 0.7190  | 0.9378  | 0.9378  | 1.0000  | -0.8700 | 0.8604  | 0.8536  |
| TER     | -0.7669 | -0.6111 | -0.6061 | -0.6464 | -0.8861 | -0.8883 | -0.8883 | -0.8700 | 1.0000  | -0.8722 | -0.8906 |
| CHRF    | 0.7656  | 0.6050  | 0.6061  | 0.6469  | 0.7965  | 0.8669  | 0.8669  | 0.8604  | -0.8722 | 1.0000  | 0.9907  |
| BLEU    | 0.7641  | 0.6037  | 0.6048  | 0.6464  | 0.8013  | 0.8603  | 0.8603  | 0.8536  | -0.8906 | 0.9907  | 1.0000  |

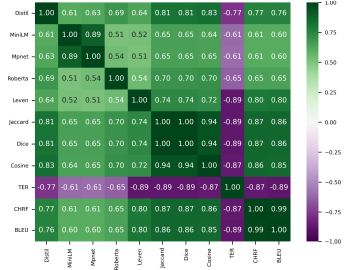

| UkrZho  | Distil  | MiniLM  | Mpnet   | Roberta | Leven   | Jaccard | Dice    | Cosine  | TER     | CHRF    | BLEU    |
|---------|---------|---------|---------|---------|---------|---------|---------|---------|---------|---------|---------|
| Distil  | 1.0000  | 0.6342  | 0.6561  | 0.7253  | 0.6777  | 0.8285  | 0.8285  | 0.8428  | -0.7896 | 0.7841  | 0.7878  |
| MiniLM  | 0.6342  | 1.0000  | 0.9068  | 0.5446  | 0.5598  | 0.6669  | 0.6669  | 0.6606  | -0.6401 | 0.6210  | 0.6250  |
| Mpnet   | 0.6561  | 0.9068  | 1.0000  | 0.5693  | 0.5531  | 0.6696  | 0.6696  | 0.6673  | -0.6377 | 0.6272  | 0.6313  |
| Roberta | 0.7253  | 0.5446  | 0.5693  | 1.0000  | 0.5944  | 0.7260  | 0.7260  | 0.7350  | -0.6853 | 0.6820  | 0.6854  |
| Leven   | 0.6777  | 0.5598  | 0.5531  | 0.5944  | 1.0000  | 0.7724  | 0.7724  | 0.7537  | -0.9040 | 0.8241  | 0.8318  |
| Jaccard | 0.8285  | 0.6669  | 0.6696  | 0.7260  | 0.7724  | 1.0000  | 1.0000  | 0.9442  | -0.9040 | 0.8740  | 0.8752  |
| Dice    | 0.8285  | 0.6669  | 0.6696  | 0.7260  | 0.7724  | 1.0000  | 1.0000  | 0.9442  | -0.9040 | 0.8740  | 0.8752  |
| Cosine  | 0.8428  | 0.6606  | 0.6673  | 0.7350  | 0.7537  | 0.9442  | 0.9442  | 1.0000  | -0.8888 | 0.8758  | 0.8763  |
| TER     | -0.7896 | -0.6401 | -0.6377 | -0.6853 | -0.9040 | -0.9040 | -0.9040 | -0.8888 | 1.0000  | -0.8857 | -0.9067 |
| CHRF    | 0.7841  | 0.6210  | 0.6272  | 0.6820  | 0.8241  | 0.8740  | 0.8740  | 0.8758  | -0.8857 | 1.0000  | 0.9916  |
| BLEU    | 0.7878  | 0.6250  | 0.6313  | 0.6854  | 0.8318  | 0.8752  | 0.8752  | 0.8763  | -0.9067 | 0.9916  | 1.0000  |

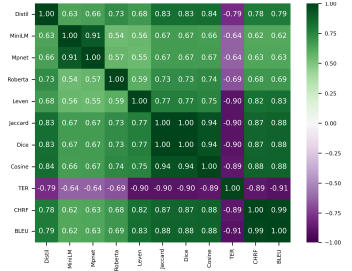

| VieZho  | Distil  | MiniLM  | Mpnet   | Roberta | Leven   | Jaccard | Dice    | Cosine  | TER     | CHRF    | BLEU    |
|---------|---------|---------|---------|---------|---------|---------|---------|---------|---------|---------|---------|
| Distil  | 1.0000  | 0.6368  | 0.6592  | 0.7340  | 0.6678  | 0.8333  | 0.8333  | 0.8472  | -0.7877 | 0.7880  | 0.7886  |
| MiniLM  | 0.6368  | 1.0000  | 0.9103  | 0.5465  | 0.5557  | 0.6686  | 0.6686  | 0.6642  | -0.6383 | 0.6224  | 0.6241  |
| Mpnet   | 0.6592  | 0.9103  | 1.0000  | 0.5712  | 0.5479  | 0.6720  | 0.6720  | 0.6709  | -0.6364 | 0.6294  | 0.6309  |
| Roberta | 0.7340  | 0.5465  | 0.5712  | 1.0000  | 0.5838  | 0.7305  | 0.7305  | 0.7387  | -0.6846 | 0.6862  | 0.6871  |
| Leven   | 0.6678  | 0.5557  | 0.5479  | 0.5838  | 1.0000  | 0.7681  | 0.7681  | 0.7489  | -0.8989 | 0.8195  | 0.8263  |
| Jaccard | 0.8333  | 0.6686  | 0.6720  | 0.7305  | 0.7681  | 1.0000  | 1.0000  | 0.9462  | -0.9041 | 0.8765  | 0.8750  |
| Dice    | 0.8333  | 0.6686  | 0.6720  | 0.7305  | 0.7681  | 1.0000  | 1.0000  | 0.9462  | -0.9041 | 0.8765  | 0.8750  |
| Cosine  | 0.8472  | 0.6642  | 0.6709  | 0.7387  | 0.7489  | 0.9462  | 0.9462  | 1.0000  | -0.8889 | 0.8771  | 0.8749  |
| TER     | -0.7877 | -0.6383 | -0.6364 | -0.6846 | -0.8989 | -0.9041 | -0.9041 | -0.8889 | 1.0000  | -0.8851 | -0.9046 |
| CHRF    | 0.7880  | 0.6224  | 0.6294  | 0.6862  | 0.8195  | 0.8765  | 0.8765  | 0.8771  | -0.8851 | 1.0000  | 0.9916  |
| BLEU    | 0.7886  | 0.6241  | 0.6309  | 0.6871  | 0.8263  | 0.8750  | 0.8750  | 0.8749  | -0.9046 | 0.9916  | 1.0000  |

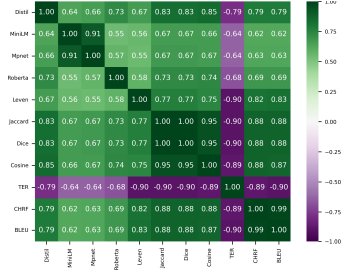

4. Pearson Correlation Coefficient (ZhoX)

| ZhoAra  | Distil  | MiniLM  | Mpnet   | Roberta | Leven   | Jaccard | Dice    | Cosine  | TER     | CHRF    | BLEU    |
|---------|---------|---------|---------|---------|---------|---------|---------|---------|---------|---------|---------|
| Distil  | 1.0000  | 0.5432  | 0.7751  | 0.6492  | 0.3819  | 0.3118  | 0.3171  | 0.2990  | -0.3792 | 0.3682  | 0.2749  |
| MiniLM  | 0.5432  | 1.0000  | 0.5821  | 0.4913  | 0.4789  | 0.4963  | 0.5064  | 0.5057  | -0.4930 | 0.5234  | 0.4237  |
| Mpnet   | 0.7751  | 0.5821  | 1.0000  | 0.6119  | 0.3686  | 0.3454  | 0.3495  | 0.3351  | -0.3729 | 0.3638  | 0.3099  |
| Roberta | 0.6492  | 0.4913  | 0.6119  | 1.0000  | 0.3123  | 0.2838  | 0.2971  | 0.3055  | -0.2998 | 0.3554  | 0.2408  |
| Leven   | 0.3819  | 0.4789  | 0.3686  | 0.3123  | 1.0000  | 0.7214  | 0.7200  | 0.6777  | -0.7886 | 0.7892  | 0.7162  |
| Jaccard | 0.3118  | 0.4963  | 0.3454  | 0.2838  | 0.7214  | 1.0000  | 0.9863  | 0.9352  | -0.8585 | 0.8347  | 0.8645  |
| Dice    | 0.3171  | 0.5064  | 0.3495  | 0.2971  | 0.7200  | 0.9863  | 1.0000  | 0.9543  | -0.8611 | 0.8402  | 0.8281  |
| Cosine  | 0.2990  | 0.5057  | 0.3351  | 0.3055  | 0.6777  | 0.9352  | 0.9543  | 1.0000  | -0.8377 | 0.8070  | 0.8169  |
| TER     | -0.3792 | -0.4930 | -0.3729 | -0.2998 | -0.7886 | -0.8585 | -0.8611 | -0.8377 | 1.0000  | -0.7329 | -0.8039 |
| CHRF    | 0.3682  | 0.5234  | 0.3638  | 0.3554  | 0.7892  | 0.8347  | 0.8402  | 0.8070  | -0.7329 | 1.0000  | 0.7831  |
| BLEU    | 0.2749  | 0.4237  | 0.3099  | 0.2408  | 0.7162  | 0.8645  | 0.8281  | 0.8169  | -0.8039 | 0.7831  | 1.0000  |

| ZhoCes  | Distil  | MiniLM  | Mpnet   | Roberta | Leven   | Jaccard | Dice    | Cosine  | TER     | CHRF    | BLEU    |
|---------|---------|---------|---------|---------|---------|---------|---------|---------|---------|---------|---------|
| Distil  | 1.0000  | 0.7684  | 0.7845  | 0.7621  | 0.5069  | 0.5209  | 0.5409  | 0.5476  | -0.4906 | 0.6524  | 0.4409  |
| MiniLM  | 0.7684  | 1.0000  | 0.8702  | 0.7077  | 0.5864  | 0.6541  | 0.6749  | 0.6758  | -0.5993 | 0.7770  | 0.5511  |
| Mpnet   | 0.7845  | 0.8702  | 1.0000  | 0.7048  | 0.5395  | 0.5804  | 0.5997  | 0.6033  | -0.5364 | 0.7099  | 0.4917  |
| Roberta | 0.7621  | 0.7077  | 0.7048  | 1.0000  | 0.4413  | 0.4497  | 0.4722  | 0.4870  | -0.4204 | 0.6130  | 0.3824  |
| Leven   | 0.5069  | 0.5864  | 0.5395  | 0.4413  | 1.0000  | 0.6771  | 0.6745  | 0.6476  | -0.7652 | 0.7605  | 0.6990  |
| Jaccard | 0.5209  | 0.6541  | 0.5804  | 0.4497  | 0.6771  | 1.0000  | 0.9850  | 0.9360  | -0.8487 | 0.8227  | 0.8495  |
| Dice    | 0.5409  | 0.6749  | 0.5997  | 0.4722  | 0.6745  | 0.9850  | 1.0000  | 0.9569  | -0.8537 | 0.8212  | 0.8105  |
| Cosine  | 0.5476  | 0.6758  | 0.6033  | 0.4870  | 0.6476  | 0.9360  | 0.9569  | 1.0000  | -0.8335 | 0.8004  | 0.7995  |
| TER     | -0.4906 | -0.5993 | -0.5364 | -0.4204 | -0.7652 | -0.8487 | -0.8537 | -0.8335 | 1.0000  | -0.7282 | -0.7931 |
| CHRF    | 0.6524  | 0.7770  | 0.7099  | 0.6130  | 0.7605  | 0.8227  | 0.8212  | 0.8004  | -0.7282 | 1.0000  | 0.7749  |
| BLEU    | 0.4409  | 0.5511  | 0.4917  | 0.3824  | 0.6990  | 0.8495  | 0.8105  | 0.7995  | -0.7931 | 0.7749  | 1.0000  |

| ZhoEng  | Distil  | MiniLM  | Mpnet   | Roberta | Leven   | Jaccard | Dice    | Cosine  | TER     | CHRF    | BLEU    |
|---------|---------|---------|---------|---------|---------|---------|---------|---------|---------|---------|---------|
| Distil  | 1.0000  | 0.9206  | 0.9100  | 0.8034  | 0.5428  | 0.6353  | 0.6613  | 0.6521  | -0.5927 | 0.6925  | 0.5502  |
| MiniLM  | 0.9206  | 1.0000  | 0.9028  | 0.7877  | 0.5507  | 0.6528  | 0.6759  | 0.6529  | -0.5928 | 0.7041  | 0.5542  |
| Mpnet   | 0.9100  | 0.9028  | 1.0000  | 0.7975  | 0.5266  | 0.6165  | 0.6425  | 0.6306  | -0.5731 | 0.6764  | 0.5311  |
| Roberta | 0.8034  | 0.7877  | 0.7975  | 1.0000  | 0.5156  | 0.5881  | 0.6154  | 0.5990  | -0.5686 | 0.6302  | 0.5081  |
| Leven   | 0.5428  | 0.5507  | 0.5266  | 0.5156  | 1.0000  | 0.7558  | 0.7470  | 0.7007  | -0.8231 | 0.7830  | 0.7846  |
| Jaccard | 0.6353  | 0.6528  | 0.6165  | 0.5881  | 0.7558  | 1.0000  | 0.9867  | 0.9167  | -0.8562 | 0.8763  | 0.8861  |
| Dice    | 0.6613  | 0.6759  | 0.6425  | 0.6154  | 0.7470  | 0.9867  | 1.0000  | 0.9373  | -0.8612 | 0.8729  | 0.8505  |
| Cosine  | 0.6521  | 0.6529  | 0.6306  | 0.5990  | 0.7007  | 0.9167  | 0.9373  | 1.0000  | -0.8252 | 0.8467  | 0.8279  |
| TER     | -0.5927 | -0.5928 | -0.5731 | -0.5686 | -0.8231 | -0.8562 | -0.8612 | -0.8252 | 1.0000  | -0.7665 | -0.8265 |
| CHRF    | 0.6925  | 0.7041  | 0.6764  | 0.6302  | 0.7830  | 0.8763  | 0.8729  | 0.8467  | -0.7665 | 1.0000  | 0.8556  |
| BLEU    | 0.5502  | 0.5542  | 0.5311  | 0.5081  | 0.7846  | 0.8861  | 0.8505  | 0.8279  | -0.8265 | 0.8556  | 1.0000  |

| ZhoFil  | Distil  | MiniLM  | Mpnet   | Roberta | Leven   | Jaccard | Dice    | Cosine  | TER     | CHRF    | BLEU    |
|---------|---------|---------|---------|---------|---------|---------|---------|---------|---------|---------|---------|
| Distil  | 1.0000  | 0.8173  | 0.8453  | 0.7227  | 0.5314  | 0.6622  | 0.6746  | 0.6645  | -0.5796 | 0.6926  | 0.5487  |
| MiniLM  | 0.8173  | 1.0000  | 0.8212  | 0.7174  | 0.5761  | 0.7186  | 0.7319  | 0.7065  | -0.6237 | 0.7339  | 0.5939  |
| Mpnet   | 0.8453  | 0.8212  | 1.0000  | 0.6767  | 0.4785  | 0.6058  | 0.6139  | 0.5716  | -0.5203 | 0.6170  | 0.4977  |
| Roberta | 0.7227  | 0.7174  | 0.6767  | 1.0000  | 0.4780  | 0.5915  | 0.6031  | 0.5980  | -0.5291 | 0.6093  | 0.4805  |
| Leven   | 0.5314  | 0.5761  | 0.4785  | 0.4780  | 1.0000  | 0.7010  | 0.6886  | 0.6060  | -0.7656 | 0.7616  | 0.7687  |
| Jaccard | 0.6622  | 0.7186  | 0.6058  | 0.5915  | 0.7010  | 1.0000  | 0.9887  | 0.8366  | -0.7893 | 0.8386  | 0.8192  |
| Dice    | 0.6746  | 0.7319  | 0.6139  | 0.6031  | 0.6886  | 0.9887  | 1.0000  | 0.8627  | -0.7845 | 0.8402  | 0.7865  |
| Cosine  | 0.6645  | 0.7065  | 0.5716  | 0.5980  | 0.6060  | 0.8366  | 0.8627  | 1.0000  | -0.7426 | 0.7811  | 0.7214  |
| TER     | -0.5796 | -0.6237 | -0.5203 | -0.5291 | -0.7656 | -0.7893 | -0.7845 | -0.7426 | 1.0000  | -0.6795 | -0.7896 |
| CHRF    | 0.6926  | 0.7339  | 0.6170  | 0.6093  | 0.7616  | 0.8386  | 0.8402  | 0.7811  | -0.6795 | 1.0000  | 0.8010  |
| BLEU    | 0.5487  | 0.5939  | 0.4977  | 0.4805  | 0.7687  | 0.8192  | 0.7865  | 0.7214  | -0.7896 | 0.8010  | 1.0000  |

| ZhoFra  | Distil  | MiniLM  | Mpnet   | Roberta | Leven   | Jaccard | Dice    | Cosine  | TER     | CHRF    | BLEU    |
|---------|---------|---------|---------|---------|---------|---------|---------|---------|---------|---------|---------|
| Distil  | 1.0000  | 0.8331  | 0.8092  | 0.7019  | 0.6086  | 0.6974  | 0.7166  | 0.6898  | -0.6495 | 0.7625  | 0.6346  |
| MiniLM  | 0.8331  | 1.0000  | 0.8563  | 0.6856  | 0.5959  | 0.6905  | 0.7092  | 0.6680  | -0.6303 | 0.7521  | 0.6142  |
| Mpnet   | 0.8092  | 0.8563  | 1.0000  | 0.6667  | 0.5754  | 0.6448  | 0.6599  | 0.6153  | -0.5950 | 0.6977  | 0.5743  |
| Roberta | 0.7019  | 0.6856  | 0.6667  | 1.0000  | 0.5521  | 0.6452  | 0.6623  | 0.6315  | -0.5906 | 0.7047  | 0.5720  |
| Leven   | 0.6086  | 0.5959  | 0.5754  | 0.5521  | 1.0000  | 0.7429  | 0.7292  | 0.6513  | -0.7682 | 0.7772  | 0.7561  |
| Jaccard | 0.6974  | 0.6905  | 0.6448  | 0.6452  | 0.7429  | 1.0000  | 0.9859  | 0.8932  | -0.8256 | 0.8722  | 0.8913  |
| Dice    | 0.7166  | 0.7092  | 0.6599  | 0.6623  | 0.7292  | 0.9859  | 1.0000  | 0.9171  | -0.8331 | 0.8714  | 0.8587  |
| Cosine  | 0.6898  | 0.6680  | 0.6153  | 0.6315  | 0.6513  | 0.8932  | 0.9171  | 1.0000  | -0.7929 | 0.8181  | 0.8345  |
| TER     | -0.6495 | -0.6303 | -0.5950 | -0.5906 | -0.7682 | -0.8256 | -0.8331 | -0.7929 | 1.0000  | -0.7462 | -0.7982 |
| CHRF    | 0.7625  | 0.7521  | 0.6977  | 0.7047  | 0.7772  | 0.8722  | 0.8714  | 0.8181  | -0.7462 | 1.0000  | 0.8408  |
| BLEU    | 0.6346  | 0.6142  | 0.5743  | 0.5720  | 0.7561  | 0.8913  | 0.8587  | 0.8345  | -0.7982 | 0.8408  | 1.0000  |

| ZhoInd  | Distil  | MiniLM  | Mpnet   | Roberta | Leven   | Jaccard | Dice    | Cosine  | TER     | CHRF    | BLEU    |
|---------|---------|---------|---------|---------|---------|---------|---------|---------|---------|---------|---------|
| Distil  | 1.0000  | 0.8141  | 0.8348  | 0.7470  | 0.5723  | 0.6872  | 0.7055  | 0.7186  | -0.6451 | 0.6792  | 0.5670  |
| MiniLM  | 0.8141  | 1.0000  | 0.8655  | 0.7267  | 0.6042  | 0.7397  | 0.7625  | 0.7586  | -0.6650 | 0.7351  | 0.5949  |
| Mpnet   | 0.8348  | 0.8655  | 1.0000  | 0.7207  | 0.5651  | 0.6879  | 0.7099  | 0.7108  | -0.6242 | 0.6852  | 0.5565  |
| Roberta | 0.7470  | 0.7267  | 0.7207  | 1.0000  | 0.4913  | 0.6099  | 0.6364  | 0.6375  | -0.5607 | 0.6178  | 0.4763  |
| Leven   | 0.5723  | 0.6042  | 0.5651  | 0.4913  | 1.0000  | 0.7314  | 0.7252  | 0.6913  | -0.7972 | 0.7882  | 0.7565  |
| Jaccard | 0.6872  | 0.7397  | 0.6879  | 0.6099  | 0.7314  | 1.0000  | 0.9867  | 0.9326  | -0.8392 | 0.8628  | 0.8350  |
| Dice    | 0.7055  | 0.7625  | 0.7099  | 0.6364  | 0.7252  | 0.9867  | 1.0000  | 0.9481  | -0.8401 | 0.8648  | 0.7938  |
| Cosine  | 0.7186  | 0.7586  | 0.7108  | 0.6375  | 0.6913  | 0.9326  | 0.9481  | 1.0000  | -0.8373 | 0.8280  | 0.7814  |
| TER     | -0.6451 | -0.6650 | -0.6242 | -0.5607 | -0.7972 | -0.8392 | -0.8401 | -0.8373 | 1.0000  | -0.7205 | -0.7863 |
| CHRF    | 0.6792  | 0.7351  | 0.6852  | 0.6178  | 0.7882  | 0.8628  | 0.8648  | 0.8280  | -0.7205 | 1.0000  | 0.8008  |
| BLEU    | 0.5670  | 0.5949  | 0.5565  | 0.4763  | 0.7565  | 0.8350  | 0.7938  | 0.7814  | -0.7863 | 0.8008  | 1.0000  |

| ZhoIta  | Distil  | MiniLM  | Mpnet   | Roberta | Leven   | Jaccard | Dice    | Cosine  | TER     | CHRF    | BLEU    |
|---------|---------|---------|---------|---------|---------|---------|---------|---------|---------|---------|---------|
| Distil  | 1.0000  | 0.8405  | 0.8295  | 0.7313  | 0.6268  | 0.7023  | 0.7221  | 0.7186  | -0.6588 | 0.7403  | 0.6140  |
| MiniLM  | 0.8405  | 1.0000  | 0.8529  | 0.7313  | 0.6514  | 0.7467  | 0.7713  | 0.7606  | -0.6731 | 0.7999  | 0.6398  |
| Mpnet   | 0.8295  | 0.8529  | 1.0000  | 0.6956  | 0.5969  | 0.6669  | 0.6864  | 0.6717  | -0.6203 | 0.7056  | 0.5769  |
| Roberta | 0.7313  | 0.7313  | 0.6956  | 1.0000  | 0.5884  | 0.6549  | 0.6736  | 0.6658  | -0.6030 | 0.7180  | 0.5649  |
| Leven   | 0.6268  | 0.6514  | 0.5969  | 0.5884  | 1.0000  | 0.7497  | 0.7441  | 0.7113  | -0.7862 | 0.7875  | 0.7667  |
| Jaccard | 0.7023  | 0.7467  | 0.6669  | 0.6549  | 0.7497  | 1.0000  | 0.9852  | 0.9387  | -0.8410 | 0.8590  | 0.8744  |
| Dice    | 0.7221  | 0.7713  | 0.6864  | 0.6736  | 0.7441  | 0.9852  | 1.0000  | 0.9573  | -0.8426 | 0.8647  | 0.8334  |
| Cosine  | 0.7186  | 0.7606  | 0.6717  | 0.6658  | 0.7113  | 0.9387  | 0.9573  | 1.0000  | -0.8289 | 0.8363  | 0.8179  |
| TER     | -0.6588 | -0.6731 | -0.6203 | -0.6030 | -0.7862 | -0.8410 | -0.8426 | -0.8289 | 1.0000  | -0.7192 | -0.8003 |
| CHRF    | 0.7403  | 0.7999  | 0.7056  | 0.7180  | 0.7875  | 0.8590  | 0.8647  | 0.8363  | -0.7192 | 1.0000  | 0.8088  |
| BLEU    | 0.6140  | 0.6398  | 0.5769  | 0.5649  | 0.7667  | 0.8744  | 0.8334  | 0.8179  | -0.8003 | 0.8088  | 1.0000  |

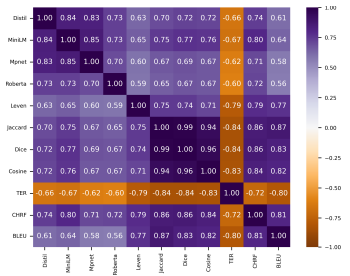

| ZhoKaz  | Distil  | MiniLM  | Mpnet   | Roberta | Leven   | Jaccard | Dice    | Cosine  | TER     | CHRF    | BLEU    |
|---------|---------|---------|---------|---------|---------|---------|---------|---------|---------|---------|---------|
| Distil  | 1.0000  | 0.5280  | 0.5982  | 0.6768  | 0.3878  | 0.3906  | 0.4045  | 0.4015  | -0.3848 | 0.5390  | 0.3163  |
| MiniLM  | 0.5280  | 1.0000  | 0.8342  | 0.4787  | 0.4026  | 0.4741  | 0.4854  | 0.4846  | -0.4253 | 0.5233  | 0.3896  |
| Mpnet   | 0.5982  | 0.8342  | 1.0000  | 0.5266  | 0.3876  | 0.4646  | 0.4769  | 0.4786  | -0.4198 | 0.5071  | 0.3874  |
| Roberta | 0.6768  | 0.4787  | 0.5266  | 1.0000  | 0.3279  | 0.3185  | 0.3359  | 0.3386  | -0.3012 | 0.4784  | 0.2433  |
| Leven   | 0.3878  | 0.4026  | 0.3876  | 0.3279  | 1.0000  | 0.6711  | 0.6626  | 0.6127  | -0.7339 | 0.7193  | 0.6478  |
| Jaccard | 0.3906  | 0.4741  | 0.4646  | 0.3185  | 0.6711  | 1.0000  | 0.9865  | 0.9359  | -0.8252 | 0.7799  | 0.8372  |
| Dice    | 0.4045  | 0.4854  | 0.4769  | 0.3359  | 0.6626  | 0.9865  | 1.0000  | 0.9533  | -0.8239 | 0.7835  | 0.7925  |
| Cosine  | 0.4015  | 0.4846  | 0.4786  | 0.3386  | 0.6127  | 0.9359  | 0.9533  | 1.0000  | -0.7949 | 0.7553  | 0.7858  |
| TER     | -0.3848 | -0.4253 | -0.4198 | -0.3012 | -0.7339 | -0.8252 | -0.8239 | -0.7949 | 1.0000  | -0.6367 | -0.7565 |
| CHRF    | 0.5390  | 0.5233  | 0.5071  | 0.4784  | 0.7193  | 0.7799  | 0.7835  | 0.7553  | -0.6367 | 1.0000  | 0.6890  |
| BLEU    | 0.3163  | 0.3896  | 0.3874  | 0.2433  | 0.6478  | 0.8372  | 0.7925  | 0.7858  | -0.7565 | 0.6890  | 1.0000  |

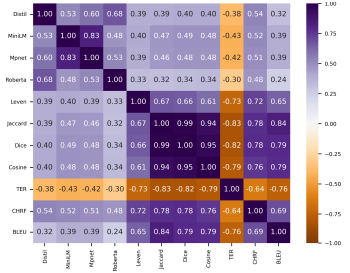

| ZhoKhm  | Distil  | MiniLM  | Mpnet   | Roberta | Leven   | Jaccard | Dice    | Cosine  | TER     | CHRF    | BLEU    |
|---------|---------|---------|---------|---------|---------|---------|---------|---------|---------|---------|---------|
| Distil  | 1.0000  | 0.7766  | 0.7314  | 0.5754  | 0.2273  | 0.3039  | 0.3236  | 0.3577  | -0.4777 | 0.2933  | 0.2269  |
| MiniLM  | 0.7766  | 1.0000  | 0.9489  | 0.3885  | 0.1415  | 0.2283  | 0.2382  | 0.2681  | -0.4284 | 0.1420  | 0.1571  |
| Mpnet   | 0.7314  | 0.9489  | 1.0000  | 0.3833  | 0.1440  | 0.2202  | 0.2297  | 0.2616  | -0.4183 | 0.1425  | 0.1572  |
| Roberta | 0.5754  | 0.3885  | 0.3833  | 1.0000  | 0.3663  | 0.4277  | 0.4505  | 0.4747  | -0.4597 | 0.5019  | 0.3491  |
| Leven   | 0.2273  | 0.1415  | 0.1440  | 0.3663  | 1.0000  | 0.7177  | 0.7119  | 0.6878  | -0.7262 | 0.7706  | 0.7462  |
| Jaccard | 0.3039  | 0.2283  | 0.2202  | 0.4277  | 0.7177  | 1.0000  | 0.9886  | 0.9312  | -0.7802 | 0.8384  | 0.8308  |
| Dice    | 0.3236  | 0.2382  | 0.2297  | 0.4505  | 0.7119  | 0.9886  | 1.0000  | 0.9465  | -0.7880 | 0.8413  | 0.7976  |
| Cosine  | 0.3577  | 0.2681  | 0.2616  | 0.4747  | 0.6878  | 0.9312  | 0.9465  | 1.0000  | -0.7850 | 0.8221  | 0.7775  |
| TER     | -0.4777 | -0.4284 | -0.4183 | -0.4597 | -0.7262 | -0.7802 | -0.7880 | -0.7850 | 1.0000  | -0.6556 | -0.7155 |
| CHRF    | 0.2933  | 0.1420  | 0.1425  | 0.5019  | 0.7706  | 0.8384  | 0.8413  | 0.8221  | -0.6556 | 1.0000  | 0.8019  |
| BLEU    | 0.2269  | 0.1571  | 0.1572  | 0.3491  | 0.7462  | 0.8308  | 0.7976  | 0.7775  | -0.7155 | 0.8019  | 1.0000  |

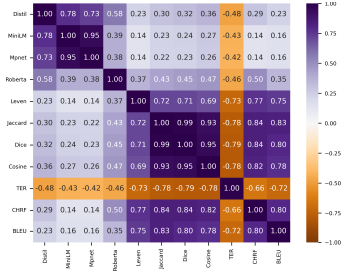

| ZhoKir  | Distil  | MiniLM  | Mpnet   | Roberta | Leven   | Jaccard | Dice    | Cosine  | TER     | CHRF    | BLEU    |
|---------|---------|---------|---------|---------|---------|---------|---------|---------|---------|---------|---------|
| Distil  | 1.0000  | 0.5461  | 0.5595  | 0.5273  | 0.3740  | 0.4076  | 0.4198  | 0.4231  | -0.3646 | 0.5218  | 0.3255  |
| MiniLM  | 0.5461  | 1.0000  | 0.7912  | 0.5789  | 0.4902  | 0.5148  | 0.5286  | 0.5232  | -0.4762 | 0.6144  | 0.4128  |
| Mpnet   | 0.5595  | 0.7912  | 1.0000  | 0.5741  | 0.4360  | 0.4657  | 0.4774  | 0.4782  | -0.4211 | 0.5383  | 0.3875  |
| Roberta | 0.5273  | 0.5789  | 0.5741  | 1.0000  | 0.3133  | 0.3065  | 0.3231  | 0.3307  | -0.2711 | 0.4807  | 0.2256  |
| Leven   | 0.3740  | 0.4902  | 0.4360  | 0.3133  | 1.0000  | 0.6734  | 0.6629  | 0.5971  | -0.7061 | 0.7191  | 0.6282  |
| Jaccard | 0.4076  | 0.5148  | 0.4657  | 0.3065  | 0.6734  | 1.0000  | 0.9872  | 0.9203  | -0.8017 | 0.7643  | 0.8266  |
| Dice    | 0.4198  | 0.5286  | 0.4774  | 0.3231  | 0.6629  | 0.9872  | 1.0000  | 0.9374  | -0.8003 | 0.7650  | 0.7833  |
| Cosine  | 0.4231  | 0.5232  | 0.4782  | 0.3307  | 0.5971  | 0.9203  | 0.9374  | 1.0000  | -0.7617 | 0.7308  | 0.7731  |
| TER     | -0.3646 | -0.4762 | -0.4211 | -0.2711 | -0.7061 | -0.8017 | -0.8003 | -0.7617 | 1.0000  | -0.5922 | -0.7278 |
| CHRF    | 0.5218  | 0.6144  | 0.5383  | 0.4807  | 0.7191  | 0.7643  | 0.7650  | 0.7308  | -0.5922 | 1.0000  | 0.6663  |
| BLEU    | 0.3255  | 0.4128  | 0.3875  | 0.2256  | 0.6282  | 0.8266  | 0.7833  | 0.7731  | -0.7278 | 0.6663  | 1.0000  |

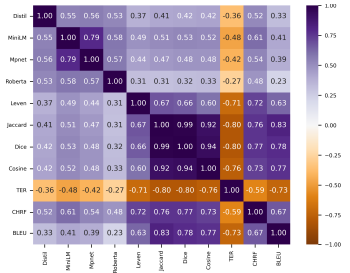

| ZhoLao  | Distil  | MiniLM  | Mpnet   | Roberta | Leven   | Jaccard | Dice    | Cosine  | TER     | CHRF    | BLEU    |
|---------|---------|---------|---------|---------|---------|---------|---------|---------|---------|---------|---------|
| Distil  | 1.0000  | 0.4389  | 0.3170  | 0.5505  | 0.4007  | 0.4678  | 0.4931  | 0.5075  | -0.4874 | 0.5470  | 0.4059  |
| MiniLM  | 0.4389  | 1.0000  | 0.7980  | 0.3040  | 0.1988  | 0.2284  | 0.2301  | 0.1629  | -0.2184 | 0.1403  | 0.1769  |
| Mpnet   | 0.3170  | 0.7980  | 1.0000  | 0.2281  | 0.2516  | 0.2295  | 0.2272  | 0.1674  | -0.2316 | 0.1478  | 0.2052  |
| Roberta | 0.5505  | 0.3040  | 0.2281  | 1.0000  | 0.3988  | 0.4224  | 0.4339  | 0.4186  | -0.3145 | 0.5161  | 0.3644  |
| Leven   | 0.4007  | 0.1988  | 0.2516  | 0.3988  | 1.0000  | 0.7615  | 0.7458  | 0.6729  | -0.5493 | 0.7877  | 0.7626  |
| Jaccard | 0.4678  | 0.2284  | 0.2295  | 0.4224  | 0.7615  | 1.0000  | 0.9882  | 0.8683  | -0.6783 | 0.8543  | 0.8711  |
| Dice    | 0.4931  | 0.2301  | 0.2272  | 0.4339  | 0.7458  | 0.9882  | 1.0000  | 0.8833  | -0.7148 | 0.8529  | 0.8324  |
| Cosine  | 0.5075  | 0.1629  | 0.1674  | 0.4186  | 0.6729  | 0.8683  | 0.8833  | 1.0000  | -0.8210 | 0.8674  | 0.8152  |
| TER     | -0.4874 | -0.2184 | -0.2316 | -0.3145 | -0.5493 | -0.6783 | -0.7148 | -0.8210 | 1.0000  | -0.6540 | -0.6220 |
| CHRF    | 0.5470  | 0.1403  | 0.1478  | 0.5161  | 0.7877  | 0.8543  | 0.8529  | 0.8674  | -0.6540 | 1.0000  | 0.8358  |
| BLEU    | 0.4059  | 0.1769  | 0.2052  | 0.3644  | 0.7626  | 0.8711  | 0.8324  | 0.8152  | -0.6220 | 0.8358  | 1.0000  |

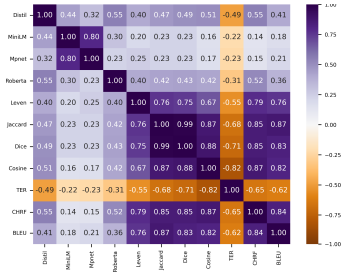

| ZhoMsa  | Distil  | MiniLM  | Mpnet   | Roberta | Leven   | Jaccard | Dice    | Cosine  | TER     | CHRF    | BLEU    |
|---------|---------|---------|---------|---------|---------|---------|---------|---------|---------|---------|---------|
| Distil  | 1.0000  | 0.8867  | 0.8978  | 0.8515  | 0.6249  | 0.7027  | 0.7442  | 0.7483  | -0.6413 | 0.7158  | 0.5537  |
| MiniLM  | 0.8867  | 1.0000  | 0.9196  | 0.8441  | 0.6460  | 0.7394  | 0.7828  | 0.7774  | -0.6517 | 0.7566  | 0.5742  |
| Mpnet   | 0.8978  | 0.9196  | 1.0000  | 0.8438  | 0.6120  | 0.6921  | 0.7369  | 0.7355  | -0.6184 | 0.7109  | 0.5375  |
| Roberta | 0.8515  | 0.8441  | 0.8438  | 1.0000  | 0.5533  | 0.6257  | 0.6786  | 0.6763  | -0.5544 | 0.6621  | 0.4651  |
| Leven   | 0.6249  | 0.6460  | 0.6120  | 0.5533  | 1.0000  | 0.7635  | 0.7601  | 0.7317  | -0.8069 | 0.8123  | 0.7656  |
| Jaccard | 0.7027  | 0.7394  | 0.6921  | 0.6257  | 0.7635  | 1.0000  | 0.9852  | 0.9409  | -0.8484 | 0.8917  | 0.8496  |
| Dice    | 0.7442  | 0.7828  | 0.7369  | 0.6786  | 0.7601  | 0.9852  | 1.0000  | 0.9584  | -0.8451 | 0.8938  | 0.8015  |
| Cosine  | 0.7483  | 0.7774  | 0.7355  | 0.6763  | 0.7317  | 0.9409  | 0.9584  | 1.0000  | -0.8448 | 0.8642  | 0.7914  |
| TER     | -0.6413 | -0.6517 | -0.6184 | -0.5544 | -0.8069 | -0.8484 | -0.8451 | -0.8448 | 1.0000  | -0.7478 | -0.7939 |
| CHRF    | 0.7158  | 0.7566  | 0.7109  | 0.6621  | 0.8123  | 0.8917  | 0.8938  | 0.8642  | -0.7478 | 1.0000  | 0.8132  |
| BLEU    | 0.5537  | 0.5742  | 0.5375  | 0.4651  | 0.7656  | 0.8496  | 0.8015  | 0.7914  | -0.7939 | 0.8132  | 1.0000  |

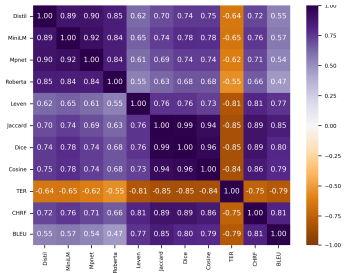

| ZhoMya  | Distil  | MiniLM  | Mpnet   | Roberta | Leven   | Jaccard | Dice    | Cosine  | TER     | CHRF    | BLEU    |
|---------|---------|---------|---------|---------|---------|---------|---------|---------|---------|---------|---------|
| Distil  | 1.0000  | 0.3367  | 0.2151  | 0.5874  | 0.2434  | 0.3326  | 0.3512  | 0.3615  | -0.4338 | 0.3167  | 0.2846  |
| MiniLM  | 0.3367  | 1.0000  | 0.9525  | 0.2670  | 0.1771  | 0.2782  | 0.2871  | 0.2807  | -0.2438 | 0.2341  | 0.2312  |
| Mpnet   | 0.2151  | 0.9525  | 1.0000  | 0.1799  | 0.1767  | 0.2404  | 0.2446  | 0.2214  | -0.2198 | 0.1945  | 0.2020  |
| Roberta | 0.5874  | 0.2670  | 0.1799  | 1.0000  | 0.3705  | 0.5188  | 0.5423  | 0.5823  | -0.4198 | 0.5710  | 0.4731  |
| Leven   | 0.2434  | 0.1771  | 0.1767  | 0.3705  | 1.0000  | 0.6838  | 0.6671  | 0.5843  | -0.6700 | 0.6973  | 0.7258  |
| Jaccard | 0.3326  | 0.2782  | 0.2404  | 0.5188  | 0.6838  | 1.0000  | 0.9900  | 0.8570  | -0.6875 | 0.8592  | 0.8550  |
| Dice    | 0.3512  | 0.2871  | 0.2446  | 0.5423  | 0.6671  | 0.9900  | 1.0000  | 0.8764  | -0.6836 | 0.8589  | 0.8328  |
| Cosine  | 0.3615  | 0.2807  | 0.2214  | 0.5823  | 0.5843  | 0.8570  | 0.8764  | 1.0000  | -0.6055 | 0.8240  | 0.7927  |
| TER     | -0.4338 | -0.2438 | -0.2198 | -0.4198 | -0.6700 | -0.6875 | -0.6836 | -0.6055 | 1.0000  | -0.5230 | -0.6620 |
| CHRF    | 0.3167  | 0.2341  | 0.1945  | 0.5710  | 0.6973  | 0.8592  | 0.8589  | 0.8240  | -0.5230 | 1.0000  | 0.8815  |
| BLEU    | 0.2846  | 0.2312  | 0.2020  | 0.4731  | 0.7258  | 0.8550  | 0.8328  | 0.7927  | -0.6620 | 0.8815  | 1.0000  |

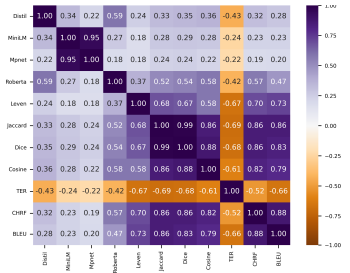

| ZhoPol  | Distil  | MiniLM  | Mpnet   | Roberta | Leven   | Jaccard | Dice    | Cosine  | TER     | CHRF    | BLEU    |
|---------|---------|---------|---------|---------|---------|---------|---------|---------|---------|---------|---------|
| Distil  | 1.0000  | 0.7962  | 0.8122  | 0.7441  | 0.5211  | 0.5259  | 0.5471  | 0.5524  | -0.4898 | 0.6474  | 0.4437  |
| MiniLM  | 0.7962  | 1.0000  | 0.8611  | 0.7359  | 0.5578  | 0.5898  | 0.6109  | 0.6114  | -0.5370 | 0.7235  | 0.4967  |
| Mpnet   | 0.8122  | 0.8611  | 1.0000  | 0.7189  | 0.5098  | 0.5224  | 0.5423  | 0.5429  | -0.4804 | 0.6563  | 0.4418  |
| Roberta | 0.7441  | 0.7359  | 0.7189  | 1.0000  | 0.4544  | 0.4509  | 0.4753  | 0.4869  | -0.4180 | 0.6230  | 0.3743  |
| Leven   | 0.5211  | 0.5578  | 0.5098  | 0.4544  | 1.0000  | 0.6952  | 0.6912  | 0.6591  | -0.7555 | 0.7710  | 0.7034  |
| Jaccard | 0.5259  | 0.5898  | 0.5224  | 0.4509  | 0.6952  | 1.0000  | 0.9849  | 0.9359  | -0.8380 | 0.8129  | 0.8533  |
| Dice    | 0.5471  | 0.6109  | 0.5423  | 0.4753  | 0.6912  | 0.9849  | 1.0000  | 0.9570  | -0.8438 | 0.8125  | 0.8137  |
| Cosine  | 0.5524  | 0.6114  | 0.5429  | 0.4869  | 0.6591  | 0.9359  | 0.9570  | 1.0000  | -0.8203 | 0.7904  | 0.7999  |
| TER     | -0.4898 | -0.5370 | -0.4804 | -0.4180 | -0.7555 | -0.8380 | -0.8438 | -0.8203 | 1.0000  | -0.7023 | -0.7823 |
| CHRF    | 0.6474  | 0.7235  | 0.6563  | 0.6230  | 0.7710  | 0.8129  | 0.8125  | 0.7904  | -0.7023 | 1.0000  | 0.7552  |
| BLEU    | 0.4437  | 0.4967  | 0.4418  | 0.3743  | 0.7034  | 0.8533  | 0.8137  | 0.7999  | -0.7823 | 0.7552  | 1.0000  |

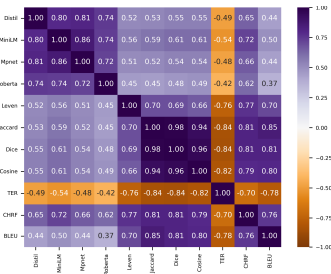

| ZhoRus  | Distil  | MiniLM  | Mpnet   | Roberta | Leven   | Jaccard | Dice    | Cosine  | TER     | CHRF    | BLEU    |
|---------|---------|---------|---------|---------|---------|---------|---------|---------|---------|---------|---------|
| Distil  | 1.0000  | 0.8020  | 0.7966  | 0.5481  | 0.5645  | 0.5963  | 0.6169  | 0.6753  | -0.6456 | 0.6741  | 0.5655  |
| MiniLM  | 0.8020  | 1.0000  | 0.8176  | 0.4313  | 0.5791  | 0.6249  | 0.6476  | 0.6675  | -0.6624 | 0.6775  | 0.5662  |
| Mpnet   | 0.7966  | 0.8176  | 1.0000  | 0.4763  | 0.5490  | 0.5826  | 0.6025  | 0.6368  | -0.5995 | 0.6350  | 0.5387  |
| Roberta | 0.5481  | 0.4313  | 0.4763  | 1.0000  | 0.1639  | 0.1959  | 0.1954  | 0.2676  | -0.2745 | 0.1586  | 0.2089  |
| Leven   | 0.5645  | 0.5791  | 0.5490  | 0.1639  | 1.0000  | 0.7304  | 0.7322  | 0.6862  | -0.7094 | 0.7876  | 0.7471  |
| Jaccard | 0.5963  | 0.6249  | 0.5826  | 0.1959  | 0.7304  | 1.0000  | 0.9843  | 0.9261  | -0.7629 | 0.8613  | 0.8823  |
| Dice    | 0.6169  | 0.6476  | 0.6025  | 0.1954  | 0.7322  | 0.9843  | 1.0000  | 0.9440  | -0.7878 | 0.8656  | 0.8421  |
| Cosine  | 0.6753  | 0.6675  | 0.6368  | 0.2676  | 0.6862  | 0.9261  | 0.9440  | 1.0000  | -0.7578 | 0.8250  | 0.8160  |
| TER     | -0.6456 | -0.6624 | -0.5995 | -0.2745 | -0.7094 | -0.7629 | -0.7878 | -0.7578 | 1.0000  | -0.6803 | -0.7006 |
| CHRF    | 0.6741  | 0.6775  | 0.6350  | 0.1586  | 0.7876  | 0.8613  | 0.8656  | 0.8250  | -0.6803 | 1.0000  | 0.8103  |
| BLEU    | 0.5655  | 0.5662  | 0.5387  | 0.2089  | 0.7471  | 0.8823  | 0.8421  | 0.8160  | -0.7006 | 0.8103  | 1.0000  |

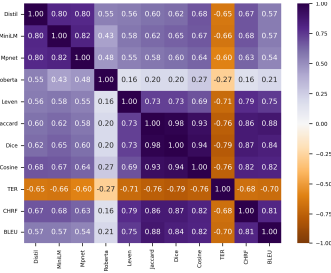

| ZhoSlk  | Distil  | MiniLM  | Mpnet   | Roberta | Leven   | Jaccard | Dice    | Cosine  | TER     | CHRF    | BLEU    |
|---------|---------|---------|---------|---------|---------|---------|---------|---------|---------|---------|---------|
| Distil  | 1.0000  | 0.7702  | 0.7824  | 0.7399  | 0.5323  | 0.5425  | 0.5598  | 0.5660  | -0.5101 | 0.6775  | 0.4664  |
| MiniLM  | 0.7702  | 1.0000  | 0.8676  | 0.7223  | 0.5829  | 0.6399  | 0.6591  | 0.6598  | -0.5871 | 0.7740  | 0.5474  |
| Mpnet   | 0.7824  | 0.8676  | 1.0000  | 0.7189  | 0.5346  | 0.5627  | 0.5801  | 0.5849  | -0.5228 | 0.7102  | 0.4862  |
| Roberta | 0.7399  | 0.7223  | 0.7189  | 1.0000  | 0.4494  | 0.4514  | 0.4721  | 0.4883  | -0.4238 | 0.6336  | 0.3917  |
| Leven   | 0.5323  | 0.5829  | 0.5346  | 0.4494  | 1.0000  | 0.6769  | 0.6738  | 0.6451  | -0.7578 | 0.7595  | 0.6962  |
| Jaccard | 0.5425  | 0.6399  | 0.5627  | 0.4514  | 0.6769  | 1.0000  | 0.9849  | 0.9351  | -0.8453 | 0.8150  | 0.8541  |
| Dice    | 0.5598  | 0.6591  | 0.5801  | 0.4721  | 0.6738  | 0.9849  | 1.0000  | 0.9560  | -0.8503 | 0.8127  | 0.8151  |
| Cosine  | 0.5660  | 0.6598  | 0.5849  | 0.4883  | 0.6451  | 0.9351  | 0.9560  | 1.0000  | -0.8287 | 0.7913  | 0.8022  |
| TER     | -0.5101 | -0.5871 | -0.5228 | -0.4238 | -0.7578 | -0.8453 | -0.8503 | -0.8287 | 1.0000  | -0.7181 | -0.7907 |
| CHRF    | 0.6775  | 0.7740  | 0.7102  | 0.6336  | 0.7595  | 0.8150  | 0.8127  | 0.7913  | -0.7181 | 1.0000  | 0.7720  |
| BLEU    | 0.4664  | 0.5474  | 0.4862  | 0.3917  | 0.6962  | 0.8541  | 0.8151  | 0.8022  | -0.7907 | 0.7720  | 1.0000  |

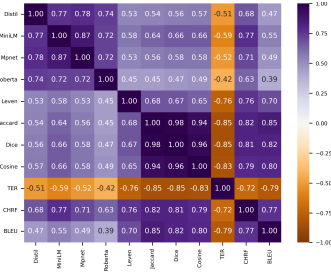

| ZhoSpa  | Distil  | MiniLM  | Mpnet   | Roberta | Leven   | Jaccard | Dice    | Cosine  | TER     | CHRF    | BLEU    |
|---------|---------|---------|---------|---------|---------|---------|---------|---------|---------|---------|---------|
| Distil  | 1.0000  | 0.7821  | 0.7721  | 0.6540  | 0.5420  | 0.6458  | 0.6593  | 0.6310  | -0.6178 | 0.7108  | 0.5945  |
| MiniLM  | 0.7821  | 1.0000  | 0.8227  | 0.6165  | 0.5156  | 0.6308  | 0.6431  | 0.6119  | -0.5968 | 0.6824  | 0.5740  |
| Mpnet   | 0.7721  | 0.8227  | 1.0000  | 0.5960  | 0.5031  | 0.5836  | 0.5930  | 0.5493  | -0.5651 | 0.6368  | 0.5305  |
| Roberta | 0.6540  | 0.6165  | 0.5960  | 1.0000  | 0.5087  | 0.6176  | 0.6283  | 0.6071  | -0.5777 | 0.6659  | 0.5473  |
| Leven   | 0.5420  | 0.5156  | 0.5031  | 0.5087  | 1.0000  | 0.6794  | 0.6695  | 0.5905  | -0.8022 | 0.7465  | 0.7245  |
| Jaccard | 0.6458  | 0.6308  | 0.5836  | 0.6176  | 0.6794  | 1.0000  | 0.9880  | 0.8688  | -0.8663 | 0.8770  | 0.8742  |
| Dice    | 0.6593  | 0.6431  | 0.5930  | 0.6283  | 0.6695  | 0.9880  | 1.0000  | 0.8937  | -0.8661 | 0.8723  | 0.8493  |
| Cosine  | 0.6310  | 0.6119  | 0.5493  | 0.6071  | 0.5905  | 0.8688  | 0.8937  | 1.0000  | -0.8092 | 0.8064  | 0.8037  |
| TER     | -0.6178 | -0.5968 | -0.5651 | -0.5777 | -0.8022 | -0.8663 | -0.8661 | -0.8092 | 1.0000  | -0.7962 | -0.8552 |
| CHRF    | 0.7108  | 0.6824  | 0.6368  | 0.6659  | 0.7465  | 0.8770  | 0.8723  | 0.8064  | -0.7962 | 1.0000  | 0.8520  |
| BLEU    | 0.5945  | 0.5740  | 0.5305  | 0.5473  | 0.7245  | 0.8742  | 0.8493  | 0.8037  | -0.8552 | 0.8520  | 1.0000  |

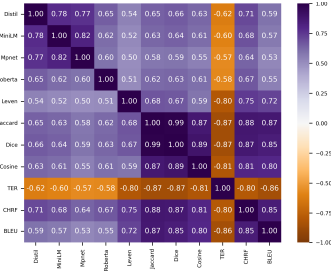

| ZhoTha  | Distil  | MiniLM  | Mpnet   | Roberta | Leven   | Jaccard | Dice    | Cosine  | TER     | CHRF    | BLEU    |
|---------|---------|---------|---------|---------|---------|---------|---------|---------|---------|---------|---------|
| Distil  | 1.0000  | 0.4674  | 0.5503  | 0.5995  | 0.3962  | 0.4530  | 0.4711  | 0.4868  | -0.5687 | 0.4468  | 0.4359  |
| MiniLM  | 0.4674  | 1.0000  | 0.8131  | 0.4326  | 0.3805  | 0.4877  | 0.5078  | 0.5375  | -0.4971 | 0.4690  | 0.4449  |
| Mpnet   | 0.5503  | 0.8131  | 1.0000  | 0.5783  | 0.3157  | 0.3971  | 0.4176  | 0.4446  | -0.4350 | 0.3780  | 0.3611  |
| Roberta | 0.5995  | 0.4326  | 0.5783  | 1.0000  | 0.3475  | 0.4388  | 0.4595  | 0.4832  | -0.4350 | 0.4369  | 0.3886  |
| Leven   | 0.3962  | 0.3805  | 0.3157  | 0.3475  | 1.0000  | 0.7233  | 0.7091  | 0.6835  | -0.7707 | 0.7820  | 0.7865  |
| Jaccard | 0.4530  | 0.4877  | 0.3971  | 0.4388  | 0.7233  | 1.0000  | 0.9871  | 0.9133  | -0.8299 | 0.8896  | 0.8662  |
| Dice    | 0.4711  | 0.5078  | 0.4176  | 0.4595  | 0.7091  | 0.9871  | 1.0000  | 0.9338  | -0.8324 | 0.8854  | 0.8413  |
| Cosine  | 0.4868  | 0.5375  | 0.4446  | 0.4832  | 0.6835  | 0.9133  | 0.9338  | 1.0000  | -0.8100 | 0.8715  | 0.8189  |
| TER     | -0.5687 | -0.4971 | -0.4350 | -0.4350 | -0.7707 | -0.8299 | -0.8324 | -0.8100 | 1.0000  | -0.7583 | -0.8082 |
| CHRF    | 0.4468  | 0.4690  | 0.3780  | 0.4369  | 0.7820  | 0.8896  | 0.8854  | 0.8715  | -0.7583 | 1.0000  | 0.9103  |
| BLEU    | 0.4359  | 0.4449  | 0.3611  | 0.3886  | 0.7865  | 0.8662  | 0.8413  | 0.8189  | -0.8082 | 0.9103  | 1.0000  |

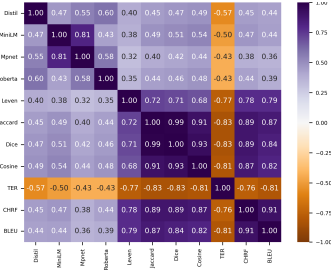

| ZhoUkr  | Distil  | MiniLM  | Mpnet   | Roberta | Leven   | Jaccard | Dice    | Cosine  | TER     | CHRF    | BLEU    |
|---------|---------|---------|---------|---------|---------|---------|---------|---------|---------|---------|---------|
| Distil  | 1.0000  | 0.7629  | 0.7980  | 0.6146  | 0.5057  | 0.5083  | 0.5189  | 0.5546  | -0.5470 | 0.5924  | 0.4675  |
| MiniLM  | 0.7629  | 1.0000  | 0.7952  | 0.5341  | 0.5049  | 0.5276  | 0.5358  | 0.5505  | -0.5475 | 0.5649  | 0.4695  |
| Mpnet   | 0.7980  | 0.7952  | 1.0000  | 0.6176  | 0.4674  | 0.4817  | 0.4897  | 0.5208  | -0.5117 | 0.5206  | 0.4397  |
| Roberta | 0.6146  | 0.5341  | 0.6176  | 1.0000  | 0.2504  | 0.2681  | 0.2701  | 0.3203  | -0.3583 | 0.2452  | 0.2594  |
| Leven   | 0.5057  | 0.5049  | 0.4674  | 0.2504  | 1.0000  | 0.6968  | 0.6964  | 0.6622  | -0.7367 | 0.7694  | 0.7012  |
| Jaccard | 0.5083  | 0.5276  | 0.4817  | 0.2681  | 0.6968  | 1.0000  | 0.9855  | 0.9358  | -0.8211 | 0.7982  | 0.8568  |
| Dice    | 0.5189  | 0.5358  | 0.4897  | 0.2701  | 0.6964  | 0.9855  | 1.0000  | 0.9521  | -0.8244 | 0.7980  | 0.8129  |
| Cosine  | 0.5546  | 0.5505  | 0.5208  | 0.3203  | 0.6622  | 0.9358  | 0.9521  | 1.0000  | -0.8115 | 0.7607  | 0.7946  |
| TER     | -0.5470 | -0.5475 | -0.5117 | -0.3583 | -0.7367 | -0.8211 | -0.8244 | -0.8115 | 1.0000  | -0.6483 | -0.7665 |
| CHRF    | 0.5924  | 0.5649  | 0.5206  | 0.2452  | 0.7694  | 0.7982  | 0.7980  | 0.7607  | -0.6483 | 1.0000  | 0.7504  |
| BLEU    | 0.4675  | 0.4695  | 0.4397  | 0.2594  | 0.7012  | 0.8568  | 0.8129  | 0.7946  | -0.7665 | 0.7504  | 1.0000  |

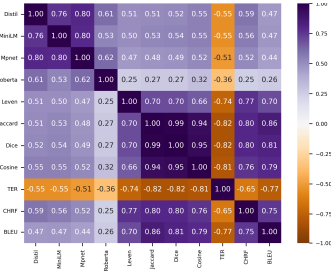

| ZhoVie  | Distil  | MiniLM  | Mpnet   | Roberta | Leven   | Jaccard | Dice    | Cosine  | TER     | CHRF    | BLEU    |
|---------|---------|---------|---------|---------|---------|---------|---------|---------|---------|---------|---------|
| Distil  | 1.0000  | 0.8397  | 0.8676  | 0.9059  | 0.4411  | 0.5538  | 0.6232  | 0.6374  | -0.5904 | 0.5193  | 0.4366  |
| MiniLM  | 0.8397  | 1.0000  | 0.8871  | 0.7515  | 0.5883  | 0.7406  | 0.7916  | 0.7925  | -0.7092 | 0.7252  | 0.6126  |
| Mpnet   | 0.8676  | 0.8871  | 1.0000  | 0.8210  | 0.4875  | 0.6093  | 0.6615  | 0.6716  | -0.6190 | 0.5785  | 0.4982  |
| Roberta | 0.9059  | 0.7515  | 0.8210  | 1.0000  | 0.3701  | 0.4792  | 0.5416  | 0.5557  | -0.5204 | 0.4186  | 0.3684  |
| Leven   | 0.4411  | 0.5883  | 0.4875  | 0.3701  | 1.0000  | 0.7749  | 0.7595  | 0.7364  | -0.8204 | 0.8163  | 0.8189  |
| Jaccard | 0.5538  | 0.7406  | 0.6093  | 0.4792  | 0.7749  | 1.0000  | 0.9839  | 0.9434  | -0.8660 | 0.9113  | 0.8698  |
| Dice    | 0.6232  | 0.7916  | 0.6615  | 0.5416  | 0.7595  | 0.9839  | 1.0000  | 0.9620  | -0.8723 | 0.9037  | 0.8290  |
| Cosine  | 0.6374  | 0.7925  | 0.6716  | 0.5557  | 0.7364  | 0.9434  | 0.9620  | 1.0000  | -0.8641 | 0.8796  | 0.8210  |
| TER     | -0.5904 | -0.7092 | -0.6190 | -0.5204 | -0.8204 | -0.8660 | -0.8723 | -0.8641 | 1.0000  | -0.7988 | -0.8195 |
| CHRF    | 0.5193  | 0.7252  | 0.5785  | 0.4186  | 0.8163  | 0.9113  | 0.9037  | 0.8796  | -0.7988 | 1.0000  | 0.9077  |
| BLEU    | 0.4366  | 0.6126  | 0.4982  | 0.3684  | 0.8189  | 0.8698  | 0.8290  | 0.8210  | -0.8195 | 0.9077  | 1.0000  |

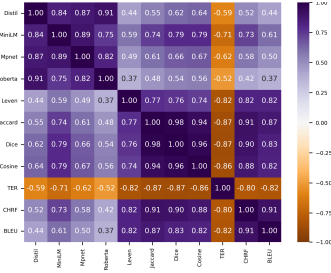

5. Kendall Correlation Coefficient (ZhoX)

|         |         |         |         |         |         |         |         |         |         |         |         |  |
|---------|---------|---------|---------|---------|---------|---------|---------|---------|---------|---------|---------|--|
| ZhoAra  | Distil  | MiniLM  | Mpnet   | Roberta | Leven   | Jaccard | Dice    | Cosine  | TER     | CHRF    | BLEU    |  |
| Distil  | 1.0000  | 0.3808  | 0.4742  | 0.3969  | 0.3943  | 0.3410  | 0.3410  | 0.3218  | -0.3860 | 0.3916  | 0.3165  |  |
| MiniLM  | 0.3808  | 1.0000  | 0.4727  | 0.3786  | 0.3536  | 0.3771  | 0.3771  | 0.3733  | -0.3729 | 0.3878  | 0.3355  |  |
| Mpnet   | 0.4742  | 0.4727  | 1.0000  | 0.4331  | 0.3776  | 0.3916  | 0.3916  | 0.3825  | -0.4011 | 0.3999  | 0.3651  |  |
| Roberta | 0.3969  | 0.3786  | 0.4331  | 1.0000  | 0.3235  | 0.3277  | 0.3277  | 0.3380  | -0.3253 | 0.3777  | 0.3016  |  |
| Leven   | 0.3943  | 0.3536  | 0.3776  | 0.3235  | 1.0000  | 0.5277  | 0.5277  | 0.4860  | -0.6254 | 0.5971  | 0.5333  |  |
| Jaccard | 0.3410  | 0.3771  | 0.3916  | 0.3277  | 0.5277  | 1.0000  | 1.0000  | 0.8349  | -0.7179 | 0.6429  | 0.6840  |  |
| Dice    | 0.3410  | 0.3771  | 0.3916  | 0.3277  | 0.5277  | 1.0000  | 1.0000  | 0.8349  | -0.7179 | 0.6429  | 0.6840  |  |
| Cosine  | 0.3218  | 0.3733  | 0.3825  | 0.3380  | 0.4860  | 0.8349  | 0.8349  | 1.0000  | -0.6816 | 0.6037  | 0.6754  |  |
| TER     | -0.3860 | -0.3729 | -0.4011 | -0.3253 | -0.6254 | -0.7179 | -0.7179 | -0.6816 | 1.0000  | -0.5621 | -0.6740 |  |
| CHRF    | 0.3916  | 0.3878  | 0.3999  | 0.3777  | 0.5971  | 0.6429  | 0.6429  | 0.6037  | -0.5621 | 1.0000  | 0.6107  |  |
| BLEU    | 0.3165  | 0.3355  | 0.3651  | 0.3016  | 0.5333  | 0.6840  | 0.6840  | 0.6754  | -0.6740 | 0.6107  | 1.0000  |  |
|         |         |         |         |         |         |         |         |         |         |         |         |  |
| ZhoCes  | Distil  | MiniLM  | Mpnet   | Roberta | Leven   | Jaccard | Dice    | Cosine  | TER     | CHRF    | BLEU    |  |
| Distil  | 1.0000  | 0.5645  | 0.5779  | 0.5535  | 0.3893  | 0.4029  | 0.4029  | 0.4050  | -0.3859 | 0.5075  | 0.3673  |  |
| MiniLM  | 0.5645  | 1.0000  | 0.6758  | 0.5045  | 0.4303  | 0.4958  | 0.4958  | 0.4945  | -0.4555 | 0.5945  | 0.4397  |  |
| Mpnet   | 0.5779  | 0.6758  | 1.0000  | 0.5014  | 0.3967  | 0.4354  | 0.4354  | 0.4374  | -0.4068 | 0.5362  | 0.3919  |  |
| Roberta | 0.5535  | 0.5045  | 0.5014  | 1.0000  | 0.3471  | 0.3619  | 0.3619  | 0.3718  | -0.3450 | 0.4718  | 0.3349  |  |
| Leven   | 0.3893  | 0.4303  | 0.3967  | 0.3471  | 1.0000  | 0.4890  | 0.4890  | 0.4620  | -0.6024 | 0.5695  | 0.5076  |  |
| Jaccard | 0.4029  | 0.4958  | 0.4354  | 0.3619  | 0.4890  | 1.0000  | 1.0000  | 0.8404  | -0.7099 | 0.6198  | 0.6715  |  |
| Dice    | 0.4029  | 0.4958  | 0.4354  | 0.3619  | 0.4890  | 1.0000  | 1.0000  | 0.8404  | -0.7099 | 0.6198  | 0.6715  |  |
| Cosine  | 0.4050  | 0.4945  | 0.4374  | 0.3718  | 0.4620  | 0.8404  | 0.8404  | 1.0000  | -0.6772 | 0.5972  | 0.6645  |  |
| TER     | -0.3859 | -0.4555 | -0.4068 | -0.3450 | -0.6024 | -0.7099 | -0.7099 | -0.6772 | 1.0000  | -0.5550 | -0.6724 |  |
| CHRF    | 0.5075  | 0.5945  | 0.5362  | 0.4718  | 0.5695  | 0.6198  | 0.6198  | 0.5972  | -0.5550 | 1.0000  | 0.5858  |  |
| BLEU    | 0.3673  | 0.4397  | 0.3919  | 0.3349  | 0.5076  | 0.6715  | 0.6715  | 0.6645  | -0.6724 | 0.5858  | 1.0000  |  |
|         |         |         |         |         |         |         |         |         |         |         |         |  |
| ZhoEng  | Distil  | MiniLM  | Mpnet   | Roberta | Leven   | Jaccard | Dice    | Cosine  | TER     | CHRF    | BLEU    |  |
| Distil  | 1.0000  | 0.7563  | 0.7404  | 0.6253  | 0.4391  | 0.5201  | 0.5201  | 0.5029  | -0.4871 | 0.5491  | 0.4761  |  |
| MiniLM  | 0.7563  | 1.0000  | 0.7340  | 0.6033  | 0.4336  | 0.5228  | 0.5228  | 0.4917  | -0.4741 | 0.5459  | 0.4604  |  |
| Mpnet   | 0.7404  | 0.7340  | 1.0000  | 0.6180  | 0.4245  | 0.5013  | 0.5013  | 0.4807  | -0.4677 | 0.5294  | 0.4562  |  |
| Roberta | 0.6253  | 0.6033  | 0.6180  | 1.0000  | 0.4302  | 0.4837  | 0.4837  | 0.4563  | -0.4702 | 0.4968  | 0.4445  |  |
| Leven   | 0.4391  | 0.4336  | 0.4245  | 0.4302  | 1.0000  | 0.5738  | 0.5738  | 0.5270  | -0.6988 | 0.6102  | 0.6060  |  |
| Jaccard | 0.5201  | 0.5228  | 0.5013  | 0.4837  | 0.5738  | 1.0000  | 1.0000  | 0.7878  | -0.7342 | 0.6928  | 0.7098  |  |
| Dice    | 0.5201  | 0.5228  | 0.5013  | 0.4837  | 0.5738  | 1.0000  | 1.0000  | 0.7878  | -0.7342 | 0.6928  | 0.7098  |  |
| Cosine  | 0.5029  | 0.4917  | 0.4807  | 0.4563  | 0.5270  | 0.7878  | 0.7878  | 1.0000  | -0.6889 | 0.6629  | 0.7007  |  |
| TER     | -0.4871 | -0.4741 | -0.4677 | -0.4702 | -0.6988 | -0.7342 | -0.7342 | -0.6889 | 1.0000  | -0.6263 | -0.7241 |  |
| CHRF    | 0.5491  | 0.5459  | 0.5294  | 0.4968  | 0.6102  | 0.6928  | 0.6928  | 0.6629  | -0.6263 | 1.0000  | 0.6878  |  |
| BLEU    | 0.4761  | 0.4604  | 0.4562  | 0.4445  | 0.6060  | 0.7098  | 0.7098  | 0.7007  | -0.7241 | 0.6878  | 1.0000  |  |
|         |         |         |         |         |         |         |         |         |         |         |         |  |
| ZhoFil  | Distil  | MiniLM  | Mpnet   | Roberta | Leven   | Jaccard | Dice    | Cosine  | TER     | CHRF    | BLEU    |  |
| Distil  | 1.0000  | 0.6188  | 0.6574  | 0.5299  | 0.3762  | 0.4872  | 0.4872  | 0.4702  | -0.4294 | 0.5024  | 0.4159  |  |
| MiniLM  | 0.6188  | 1.0000  | 0.6228  | 0.5217  | 0.4092  | 0.5358  | 0.5358  | 0.5080  | -0.4661 | 0.5389  | 0.4537  |  |
| Mpnet   | 0.6574  | 0.6228  | 1.0000  | 0.4909  | 0.3301  | 0.4315  | 0.4315  | 0.3918  | -0.3748 | 0.4322  | 0.3639  |  |
| Roberta | 0.5299  | 0.5217  | 0.4909  | 1.0000  | 0.3405  | 0.4293  | 0.4293  | 0.4192  | -0.3912 | 0.4343  | 0.3614  |  |
| Leven   | 0.3762  | 0.4092  | 0.3301  | 0.3405  | 1.0000  | 0.4999  | 0.4999  | 0.4318  | -0.6170 | 0.5659  | 0.5678  |  |
| Jaccard | 0.4872  | 0.5358  | 0.4315  | 0.4293  | 0.4999  | 1.0000  | 1.0000  | 0.6500  | -0.6350 | 0.6381  | 0.6247  |  |
| Dice    | 0.4872  | 0.5358  | 0.4315  | 0.4293  | 0.4999  | 1.0000  | 1.0000  | 0.6500  | -0.6350 | 0.6381  | 0.6247  |  |
| Cosine  | 0.4702  | 0.5080  | 0.3918  | 0.4192  | 0.4318  | 0.6500  | 0.6500  | 1.0000  | -0.5839 | 0.5798  | 0.5857  |  |
| TER     | -0.4294 | -0.4661 | -0.3748 | -0.3912 | -0.6170 | -0.6350 | -0.6350 | -0.5839 | 1.0000  | -0.5300 | -0.6592 |  |
| CHRF    | 0.5024  | 0.5389  | 0.4322  | 0.4343  | 0.5659  | 0.6381  | 0.6381  | 0.5798  | -0.5300 | 1.0000  | 0.6263  |  |
| BLEU    | 0.4159  | 0.4537  | 0.3639  | 0.3614  | 0.5678  | 0.6247  | 0.6247  | 0.5857  | -0.6592 | 0.6263  | 1.0000  |  |
|         |         |         |         |         |         |         |         |         |         |         |         |  |
| ZhoFra  | Distil  | MiniLM  | Mpnet   | Roberta | Leven   | Jaccard | Dice    | Cosine  | TER     | CHRF    | BLEU    |  |
| Distil  | 1.0000  | 0.6409  | 0.6173  | 0.5025  | 0.4472  | 0.5257  | 0.5257  | 0.4921  | -0.4964 | 0.5687  | 0.4891  |  |
| MiniLM  | 0.6409  | 1.0000  | 0.6707  | 0.4898  | 0.4321  | 0.5142  | 0.5142  | 0.4700  | -0.4729 | 0.5555  | 0.4658  |  |
| Mpnet   | 0.6173  | 0.6707  | 1.0000  | 0.4807  | 0.4199  | 0.4770  | 0.4770  | 0.4328  | -0.4489 | 0.5113  | 0.4332  |  |
| Roberta | 0.5025  | 0.4898  | 0.4807  | 1.0000  | 0.3933  | 0.4734  | 0.4734  | 0.4385  | -0.4336 | 0.5023  | 0.4291  |  |
| Leven   | 0.4472  | 0.4321  | 0.4199  | 0.3933  | 1.0000  | 0.5393  | 0.5393  | 0.4626  | -0.6445 | 0.5869  | 0.5515  |  |
| Jaccard | 0.5257  | 0.5142  | 0.4770  | 0.4734  | 0.5393  | 1.0000  | 1.0000  | 0.7352  | -0.7111 | 0.6820  | 0.7037  |  |
| Dice    | 0.5257  | 0.5142  | 0.4770  | 0.4734  | 0.5393  | 1.0000  | 1.0000  | 0.7352  | -0.7111 | 0.6820  | 0.7037  |  |
| Cosine  | 0.4921  | 0.4700  | 0.4328  | 0.4385  | 0.4626  | 0.7352  | 0.7352  | 1.0000  | -0.6476 | 0.6141  | 0.6918  |  |
| TER     | -0.4964 | -0.4729 | -0.4489 | -0.4336 | -0.6445 | -0.7111 | -0.7111 | -0.6476 | 1.0000  | -0.6014 | -0.7024 |  |
| CHRF    | 0.5687  | 0.5555  | 0.5113  | 0.5023  | 0.5869  | 0.6820  | 0.6820  | 0.6141  | -0.6014 | 1.0000  | 0.6629  |  |
| BLEU    | 0.4891  | 0.4658  | 0.4332  | 0.4291  | 0.5515  | 0.7037  | 0.7037  | 0.6918  | -0.7024 | 0.6629  | 1.0000  |  |
|         |         |         |         |         |         |         |         |         |         |         |         |  |
| ZhoInd  | Distil  | MiniLM  | Mpnet   | Roberta | Leven   | Jaccard | Dice    | Cosine  | TER     | CHRF    | BLEU    |  |
| Distil  | 1.0000  | 0.6062  | 0.6321  | 0.5437  | 0.4236  | 0.5279  | 0.5279  | 0.5390  | -0.5012 | 0.5038  | 0.4555  |  |
| MiniLM  | 0.6062  | 1.0000  | 0.6672  | 0.5220  | 0.4438  | 0.5733  | 0.5733  | 0.5694  | -0.5130 | 0.5457  | 0.4789  |  |
| Mpnet   | 0.6321  | 0.6672  | 1.0000  | 0.5130  | 0.4139  | 0.5262  | 0.5262  | 0.5281  | -0.4817 | 0.5017  | 0.4481  |  |
| Roberta | 0.5437  | 0.5220  | 0.5130  | 1.0000  | 0.3674  | 0.4723  | 0.4723  | 0.4738  | -0.4348 | 0.4598  | 0.3965  |  |
| Leven   | 0.4236  | 0.4438  | 0.4139  | 0.3674  | 1.0000  | 0.5453  | 0.5453  | 0.5080  | -0.6563 | 0.6069  | 0.5782  |  |
| Jaccard | 0.5279  | 0.5733  | 0.5262  | 0.4723  | 0.5453  | 1.0000  | 1.0000  | 0.8129  | -0.6920 | 0.6737  | 0.6511  |  |
| Dice    | 0.5279  | 0.5733  | 0.5262  | 0.4723  | 0.5453  | 1.0000  | 1.0000  | 0.8129  | -0.6920 | 0.6737  | 0.6511  |  |
| Cosine  | 0.5390  | 0.5694  | 0.5281  | 0.4738  | 0.5080  | 0.8129  | 0.8129  | 1.0000  | -0.6810 | 0.6316  | 0.6401  |  |
| TER     | -0.5012 | -0.5130 | -0.4817 | -0.4348 | -0.6563 | -0.6920 | -0.6920 | -0.6810 | 1.0000  | -0.5602 | -0.6606 |  |
| CHRF    | 0.5038  | 0.5457  | 0.5017  | 0.4598  | 0.6069  | 0.6737  | 0.6737  | 0.6316  | -0.5602 | 1.0000  | 0.6352  |  |
| BLEU    | 0.4555  | 0.4789  | 0.4481  | 0.3965  | 0.5782  | 0.6511  | 0.6511  | 0.6401  | -0.6606 | 0.6352  | 1.0000  |  |
|         |         |         |         |         |         |         |         |         |         |         |         |  |

| ZhoIta  | Distil  | MiniLM  | Mpnet   | Roberta | Leven   | Jaccard | Dice    | Cosine  | TER     | CHRF    | BLEU    |
|---------|---------|---------|---------|---------|---------|---------|---------|---------|---------|---------|---------|
| Distil  | 1.0000  | 0.6456  | 0.6363  | 0.5405  | 0.4642  | 0.5340  | 0.5340  | 0.5276  | -0.5034 | 0.5583  | 0.4864  |
| MiniLM  | 0.6456  | 1.0000  | 0.6607  | 0.5287  | 0.4787  | 0.5736  | 0.5736  | 0.5595  | -0.5123 | 0.6053  | 0.5108  |
| Mpnet   | 0.6363  | 0.6607  | 1.0000  | 0.5085  | 0.4405  | 0.5040  | 0.5040  | 0.4877  | -0.4716 | 0.5220  | 0.4557  |
| Roberta | 0.5405  | 0.5287  | 0.5085  | 1.0000  | 0.4213  | 0.4809  | 0.4809  | 0.4715  | -0.4470 | 0.5150  | 0.4321  |
| Leven   | 0.4642  | 0.4787  | 0.4405  | 0.4213  | 1.0000  | 0.5577  | 0.5577  | 0.5198  | -0.6431 | 0.6017  | 0.5842  |
| Jaccard | 0.5340  | 0.5736  | 0.5040  | 0.4809  | 0.5577  | 1.0000  | 1.0000  | 0.8232  | -0.7089 | 0.6767  | 0.6943  |
| Dice    | 0.5340  | 0.5736  | 0.5040  | 0.4809  | 0.5577  | 1.0000  | 1.0000  | 0.8232  | -0.7089 | 0.6767  | 0.6943  |
| Cosine  | 0.5276  | 0.5595  | 0.4877  | 0.4715  | 0.5198  | 0.8232  | 0.8232  | 1.0000  | -0.6850 | 0.6379  | 0.6780  |
| TER     | -0.5034 | -0.5123 | -0.4716 | -0.4470 | -0.6431 | -0.7089 | -0.7089 | -0.6850 | 1.0000  | -0.5647 | -0.6876 |
| CHRF    | 0.5583  | 0.6053  | 0.5220  | 0.5150  | 0.6017  | 0.6767  | 0.6767  | 0.6379  | -0.5647 | 1.0000  | 0.6481  |
| BLEU    | 0.4864  | 0.5108  | 0.4557  | 0.4321  | 0.5842  | 0.6943  | 0.6943  | 0.6780  | -0.6876 | 0.6481  | 1.0000  |

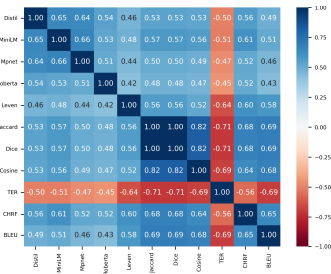

| ZhoKaz  | Distil  | MiniLM  | Mpnet   | Roberta | Leven   | Jaccard | Dice    | Cosine  | TER     | CHRF    | BLEU    |
|---------|---------|---------|---------|---------|---------|---------|---------|---------|---------|---------|---------|
| Distil  | 1.0000  | 0.3829  | 0.4229  | 0.4940  | 0.3071  | 0.3329  | 0.3329  | 0.3305  | -0.3206 | 0.4449  | 0.2888  |
| MiniLM  | 0.3829  | 1.0000  | 0.6416  | 0.3637  | 0.2939  | 0.3675  | 0.3675  | 0.3625  | -0.3301 | 0.3863  | 0.3174  |
| Mpnet   | 0.4229  | 0.6416  | 1.0000  | 0.3892  | 0.2904  | 0.3763  | 0.3763  | 0.3744  | -0.3400 | 0.3897  | 0.3313  |
| Roberta | 0.4940  | 0.3637  | 0.3892  | 1.0000  | 0.2948  | 0.3141  | 0.3141  | 0.3179  | -0.2861 | 0.4424  | 0.2617  |
| Leven   | 0.3071  | 0.2939  | 0.2904  | 0.2948  | 1.0000  | 0.4530  | 0.4530  | 0.4131  | -0.5513 | 0.5053  | 0.4473  |
| Jaccard | 0.3329  | 0.3675  | 0.3763  | 0.3141  | 0.4530  | 1.0000  | 1.0000  | 0.8433  | -0.6595 | 0.5771  | 0.6510  |
| Dice    | 0.3329  | 0.3675  | 0.3763  | 0.3141  | 0.4530  | 1.0000  | 1.0000  | 0.8433  | -0.6595 | 0.5771  | 0.6510  |
| Cosine  | 0.3305  | 0.3625  | 0.3744  | 0.3179  | 0.4131  | 0.8433  | 0.8433  | 1.0000  | -0.6219 | 0.5495  | 0.6406  |
| TER     | -0.3206 | -0.3301 | -0.3400 | -0.2861 | -0.5513 | -0.6595 | -0.6595 | -0.6219 | 1.0000  | -0.4596 | -0.6215 |
| CHRF    | 0.4449  | 0.3863  | 0.3897  | 0.4424  | 0.5053  | 0.5771  | 0.5771  | 0.5495  | -0.4596 | 1.0000  | 0.5057  |
| BLEU    | 0.2888  | 0.3174  | 0.3313  | 0.2617  | 0.4473  | 0.6510  | 0.6510  | 0.6406  | -0.6215 | 0.5057  | 1.0000  |

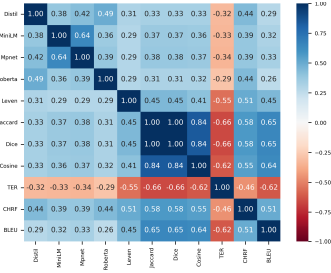

| ZhoKhm  | Distil  | MiniLM  | Mpnet   | Roberta | Leven   | Jaccard | Dice    | Cosine  | TER     | CHRF    | BLEU    |
|---------|---------|---------|---------|---------|---------|---------|---------|---------|---------|---------|---------|
| Distil  | 1.0000  | 0.4587  | 0.4460  | 0.4029  | 0.2447  | 0.2910  | 0.2910  | 0.3104  | -0.3079 | 0.3391  | 0.2758  |
| MiniLM  | 0.4587  | 1.0000  | 0.8975  | 0.2533  | 0.1645  | 0.2111  | 0.2111  | 0.2182  | -0.2759 | 0.2020  | 0.2215  |
| Mpnet   | 0.4460  | 0.8975  | 1.0000  | 0.2630  | 0.1624  | 0.2092  | 0.2092  | 0.2159  | -0.2728 | 0.2048  | 0.2206  |
| Roberta | 0.4029  | 0.2533  | 0.2630  | 1.0000  | 0.2847  | 0.3280  | 0.3280  | 0.3396  | -0.3079 | 0.3756  | 0.2973  |
| Leven   | 0.2447  | 0.1645  | 0.1624  | 0.2847  | 1.0000  | 0.5274  | 0.5274  | 0.5021  | -0.6356 | 0.5892  | 0.5606  |
| Jaccard | 0.2910  | 0.2111  | 0.2092  | 0.3280  | 0.5274  | 1.0000  | 1.0000  | 0.8030  | -0.6809 | 0.6395  | 0.6329  |
| Dice    | 0.2910  | 0.2111  | 0.2092  | 0.3280  | 0.5274  | 1.0000  | 1.0000  | 0.8030  | -0.6809 | 0.6395  | 0.6329  |
| Cosine  | 0.3104  | 0.2182  | 0.2159  | 0.3396  | 0.5021  | 0.8030  | 0.8030  | 1.0000  | -0.6564 | 0.6190  | 0.6183  |
| TER     | -0.3079 | -0.2759 | -0.2728 | -0.3079 | -0.6356 | -0.6809 | -0.6809 | -0.6564 | 1.0000  | -0.5430 | -0.6310 |
| CHRF    | 0.3391  | 0.2020  | 0.2048  | 0.3756  | 0.5892  | 0.6395  | 0.6395  | 0.6190  | -0.5430 | 1.0000  | 0.6243  |
| BLEU    | 0.2758  | 0.2215  | 0.2206  | 0.2973  | 0.5606  | 0.6329  | 0.6329  | 0.6183  | -0.6310 | 0.6243  | 1.0000  |

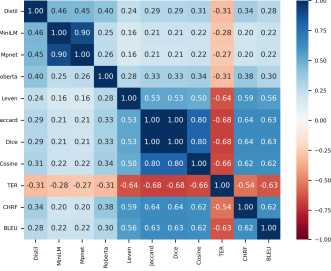

| ZhoKir  | Distil  | MiniLM  | Mpnet   | Roberta | Leven   | Jaccard | Dice    | Cosine  | TER     | CHRF    | BLEU    |
|---------|---------|---------|---------|---------|---------|---------|---------|---------|---------|---------|---------|
| Distil  | 1.0000  | 0.3744  | 0.3913  | 0.4059  | 0.2606  | 0.2977  | 0.2977  | 0.3015  | -0.2640 | 0.3815  | 0.2516  |
| MiniLM  | 0.3744  | 1.0000  | 0.6086  | 0.4197  | 0.3468  | 0.3844  | 0.3844  | 0.3802  | -0.3521 | 0.4506  | 0.3249  |
| Mpnet   | 0.3913  | 0.6086  | 1.0000  | 0.4108  | 0.3198  | 0.3698  | 0.3698  | 0.3738  | -0.3341 | 0.4175  | 0.3267  |
| Roberta | 0.4059  | 0.4197  | 0.4108  | 1.0000  | 0.2606  | 0.2878  | 0.2878  | 0.3005  | -0.2450 | 0.4277  | 0.2307  |
| Leven   | 0.2606  | 0.3468  | 0.3198  | 0.2606  | 1.0000  | 0.4458  | 0.4458  | 0.3955  | -0.5264 | 0.4943  | 0.4280  |
| Jaccard | 0.2977  | 0.3844  | 0.3698  | 0.2878  | 0.4458  | 1.0000  | 1.0000  | 0.8123  | -0.6400 | 0.5515  | 0.6412  |
| Dice    | 0.2977  | 0.3844  | 0.3698  | 0.2878  | 0.4458  | 1.0000  | 1.0000  | 0.8123  | -0.6400 | 0.5515  | 0.6412  |
| Cosine  | 0.3015  | 0.3802  | 0.3738  | 0.3005  | 0.3955  | 0.8123  | 0.8123  | 1.0000  | -0.5937 | 0.5232  | 0.6207  |
| TER     | -0.2640 | -0.3521 | -0.3341 | -0.2450 | -0.5264 | -0.6400 | -0.6400 | -0.5937 | 1.0000  | -0.4196 | -0.5989 |
| CHRF    | 0.3815  | 0.4506  | 0.4175  | 0.4277  | 0.4943  | 0.5515  | 0.5515  | 0.5232  | -0.4196 | 1.0000  | 0.4756  |
| BLEU    | 0.2516  | 0.3249  | 0.3267  | 0.2307  | 0.4280  | 0.6412  | 0.6412  | 0.6207  | -0.5989 | 0.4756  | 1.0000  |

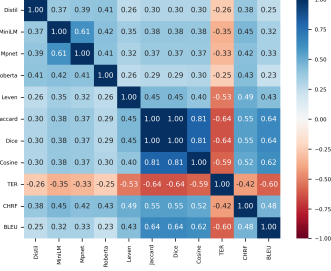

| ZhoLao  | Distil  | MiniLM  | Mpnet   | Roberta | Leven   | Jaccard | Dice    | Cosine  | TER     | CHRF    | BLEU    |
|---------|---------|---------|---------|---------|---------|---------|---------|---------|---------|---------|---------|
| Distil  | 1.0000  | 0.3007  | 0.2246  | 0.4441  | 0.3359  | 0.4331  | 0.4331  | 0.4687  | -0.4605 | 0.5010  | 0.4464  |
| MiniLM  | 0.3007  | 1.0000  | 0.7824  | 0.1851  | 0.2109  | 0.2331  | 0.2331  | 0.2024  | -0.2847 | 0.1701  | 0.2160  |
| Mpnet   | 0.2246  | 0.7824  | 1.0000  | 0.1327  | 0.2027  | 0.1909  | 0.1909  | 0.1612  | -0.2448 | 0.1317  | 0.1851  |
| Roberta | 0.4441  | 0.1851  | 0.1327  | 1.0000  | 0.3233  | 0.3646  | 0.3646  | 0.3645  | -0.3271 | 0.4356  | 0.3312  |
| Leven   | 0.3359  | 0.2109  | 0.2027  | 0.3233  | 1.0000  | 0.5275  | 0.5275  | 0.4774  | -0.5130 | 0.5575  | 0.5040  |
| Jaccard | 0.4331  | 0.2331  | 0.1909  | 0.3646  | 0.5275  | 1.0000  | 1.0000  | 0.7486  | -0.6572 | 0.6485  | 0.6763  |
| Dice    | 0.4331  | 0.2331  | 0.1909  | 0.3646  | 0.5275  | 1.0000  | 1.0000  | 0.7486  | -0.6572 | 0.6485  | 0.6763  |
| Cosine  | 0.4687  | 0.2024  | 0.1612  | 0.3645  | 0.4774  | 0.7486  | 0.7486  | 1.0000  | -0.7267 | 0.6649  | 0.7646  |
| TER     | -0.4605 | -0.2847 | -0.2448 | -0.3271 | -0.5130 | -0.6572 | -0.6572 | -0.7267 | 1.0000  | -0.5662 | -0.7374 |
| CHRF    | 0.5010  | 0.1701  | 0.1317  | 0.4356  | 0.5575  | 0.6485  | 0.6485  | 0.6649  | -0.5662 | 1.0000  | 0.6476  |
| BLEU    | 0.4464  | 0.2160  | 0.1851  | 0.3312  | 0.5040  | 0.6763  | 0.6763  | 0.7646  | -0.7374 | 0.6476  | 1.0000  |

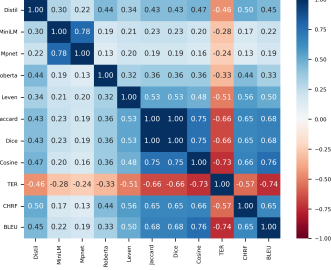

| ZhoMsa  | Distil  | MiniLM  | Mpnet   | Roberta | Leven   | Jaccard | Dice    | Cosine  | TER     | CHRF    | BLEU    |
|---------|---------|---------|---------|---------|---------|---------|---------|---------|---------|---------|---------|
| Distil  | 1.0000  | 0.6293  | 0.6484  | 0.5725  | 0.4565  | 0.5605  | 0.5605  | 0.5702  | -0.5301 | 0.5436  | 0.4956  |
| MiniLM  | 0.6293  | 1.0000  | 0.6888  | 0.5600  | 0.4762  | 0.6056  | 0.6056  | 0.6029  | -0.5404 | 0.5877  | 0.5205  |
| Mpnet   | 0.6484  | 0.6888  | 1.0000  | 0.5488  | 0.4452  | 0.5536  | 0.5536  | 0.5580  | -0.5099 | 0.5375  | 0.4868  |
| Roberta | 0.5725  | 0.5600  | 0.5488  | 1.0000  | 0.4056  | 0.5154  | 0.5154  | 0.5194  | -0.4700 | 0.5193  | 0.4471  |
| Leven   | 0.4565  | 0.4762  | 0.4452  | 0.4056  | 1.0000  | 0.5661  | 0.5661  | 0.5336  | -0.6619 | 0.6191  | 0.5920  |
| Jaccard | 0.5605  | 0.6056  | 0.5536  | 0.5154  | 0.5661  | 1.0000  | 1.0000  | 0.8288  | -0.7047 | 0.7153  | 0.6933  |
| Dice    | 0.5605  | 0.6056  | 0.5536  | 0.5154  | 0.5661  | 1.0000  | 1.0000  | 0.8288  | -0.7047 | 0.7153  | 0.6933  |
| Cosine  | 0.5702  | 0.6029  | 0.5580  | 0.5194  | 0.5336  | 0.8288  | 0.8288  | 1.0000  | -0.6995 | 0.6762  | 0.6811  |
| TER     | -0.5301 | -0.5404 | -0.5099 | -0.4700 | -0.6619 | -0.7047 | -0.7047 | -0.6995 | 1.0000  | -0.5901 | -0.6833 |
| CHRF    | 0.5436  | 0.5877  | 0.5375  | 0.5193  | 0.6191  | 0.7153  | 0.7153  | 0.6762  | -0.5901 | 1.0000  | 0.6679  |
| BLEU    | 0.4956  | 0.5205  | 0.4868  | 0.4471  | 0.5920  | 0.6933  | 0.6933  | 0.6811  | -0.6833 | 0.6679  | 1.0000  |

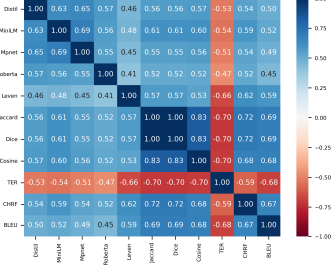

| ZhoMya  | Distil  | MiniLM  | Mpnet   | Roberta | Leven   | Jaccard | Dice    | Cosine  | TER     | CHRF    | BLEU    |
|---------|---------|---------|---------|---------|---------|---------|---------|---------|---------|---------|---------|
| Distil  | 1.0000  | 0.2183  | 0.1243  | 0.4369  | 0.2102  | 0.3010  | 0.3010  | 0.3194  | -0.3096 | 0.3237  | 0.3109  |
| MiniLM  | 0.2183  | 1.0000  | 0.7806  | 0.1504  | 0.1727  | 0.2011  | 0.2011  | 0.1790  | -0.2247 | 0.1617  | 0.1837  |
| Mpnet   | 0.1243  | 0.7806  | 1.0000  | 0.0763  | 0.1564  | 0.1544  | 0.1544  | 0.1202  | -0.1878 | 0.1099  | 0.1307  |
| Roberta | 0.4369  | 0.1504  | 0.0763  | 1.0000  | 0.2663  | 0.3893  | 0.3893  | 0.4175  | -0.3187 | 0.4293  | 0.3854  |
| Leven   | 0.2102  | 0.1727  | 0.1564  | 0.2663  | 1.0000  | 0.4663  | 0.4663  | 0.4000  | -0.5642 | 0.4756  | 0.4921  |
| Jaccard | 0.3010  | 0.2011  | 0.1544  | 0.3893  | 0.4663  | 1.0000  | 1.0000  | 0.6755  | -0.6075 | 0.6623  | 0.6644  |
| Dice    | 0.3010  | 0.2011  | 0.1544  | 0.3893  | 0.4663  | 1.0000  | 1.0000  | 0.6755  | -0.6075 | 0.6623  | 0.6644  |
| Cosine  | 0.3194  | 0.1790  | 0.1202  | 0.4175  | 0.4000  | 0.6755  | 0.6755  | 1.0000  | -0.5277 | 0.6254  | 0.6346  |
| TER     | -0.3096 | -0.2247 | -0.1878 | -0.3187 | -0.5642 | -0.6075 | -0.6075 | -0.5277 | 1.0000  | -0.4703 | -0.5838 |
| CHRF    | 0.3237  | 0.1617  | 0.1099  | 0.4293  | 0.4756  | 0.6623  | 0.6623  | 0.6254  | -0.4703 | 1.0000  | 0.7103  |
| BLEU    | 0.3109  | 0.1837  | 0.1307  | 0.3854  | 0.4921  | 0.6644  | 0.6644  | 0.6346  | -0.5838 | 0.7103  | 1.0000  |

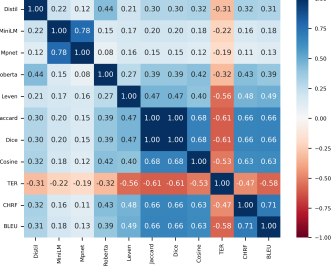

|         |         |         |         |         |         |         |         |        |         |         |         |  |
|---------|---------|---------|---------|---------|---------|---------|---------|--------|---------|---------|---------|--|
| ZhoPol  | Distil  | MiniLM  | Mpnet   | Roberta | Leven   | Jaccard | Dice    | Cosine | TER     | CHRF    | BLEU    |  |
| Distil  | 1.0000  | 0.5791  | 0.5904  | 0.5219  | 0.4066  | 0.4159  | 0.4159  | 0.4171 | -0.3944 | 0.5073  | 0.3773  |  |
| MiniLM  | 0.5791  | 1.0000  | 0.6528  | 0.5034  | 0.4207  | 0.4576  | 0.4576  | 0.4555 | -0.4212 | 0.5565  | 0.4089  |  |
| Mpnet   | 0.5904  | 0.6528  | 1.0000  | 0.4888  | 0.3849  | 0.4019  | 0.4019  | 0.4008 | -0.3758 | 0.5007  | 0.3641  |  |
| Roberta | 0.5219  | 0.5034  | 0.4888  | 1.0000  | 0.3560  | 0.3634  | 0.3634  | 0.3707 | -0.3417 | 0.4811  | 0.3297  |  |
| Leven   | 0.4066  | 0.4207  | 0.3849  | 0.3560  | 1.0000  | 0.5006  | 0.5006  | 0.4691 | -0.5931 | 0.5778  | 0.5123  |  |
| Jaccard | 0.4159  | 0.4576  | 0.4019  | 0.3634  | 0.5006  | 1.0000  | 1.0000  | 0.8384 | -0.7016 | 0.6101  | 0.6738  |  |
| Dice    | 0.4159  | 0.4576  | 0.4019  | 0.3634  | 0.5006  | 1.0000  | 1.0000  | 0.8384 | -0.7016 | 0.6101  | 0.6738  |  |
| Cosine  | 0.4171  | 0.4555  | 0.4008  | 0.3707  | 0.4691  | 0.8384  | 0.8384  | 1.0000 | -0.6654 | 0.5860  | 0.6635  |  |
| TER     | -0.3944 | -0.4212 | -0.3758 | -0.3417 | -0.5931 | -0.7016 | -0.7016 | 1.0000 | -0.6654 | -0.5314 | -0.6665 |  |
| CHRF    | 0.5073  | 0.5565  | 0.5007  | 0.4811  | 0.5778  | 0.6101  | 0.6101  | 0.5860 | -0.5314 | 1.0000  | 0.5687  |  |
| BLEU    | 0.3773  | 0.4089  | 0.3641  | 0.3297  | 0.5123  | 0.6738  | 0.6738  | 0.6635 | -0.6665 | 0.5687  | 1.0000  |  |
| ZhoRus  | Distil  | MiniLM  | Mpnet   | Roberta | Leven   | Jaccard | Dice    | Cosine | TER     | CHRF    | BLEU    |  |
| Distil  | 1.0000  | 0.6042  | 0.6024  | 0.5335  | 0.4206  | 0.4473  | 0.4473  | 0.5000 | -0.4828 | 0.5243  | 0.4576  |  |
| MiniLM  | 0.6042  | 1.0000  | 0.6255  | 0.4412  | 0.4164  | 0.4614  | 0.4614  | 0.4859 | -0.4754 | 0.5035  | 0.4499  |  |
| Mpnet   | 0.6024  | 0.6255  | 1.0000  | 0.4700  | 0.3994  | 0.4299  | 0.4299  | 0.4599 | -0.4582 | 0.4674  | 0.4284  |  |
| Roberta | 0.5335  | 0.4412  | 0.4700  | 1.0000  | 0.2993  | 0.3098  | 0.3098  | 0.3632 | -0.3634 | 0.3491  | 0.3128  |  |
| Leven   | 0.4206  | 0.4164  | 0.3994  | 0.2993  | 1.0000  | 0.5394  | 0.5394  | 0.4900 | -0.6201 | 0.5985  | 0.5616  |  |
| Jaccard | 0.4473  | 0.4614  | 0.4299  | 0.3098  | 0.5394  | 1.0000  | 1.0000  | 0.8020 | -0.7168 | 0.6741  | 0.7094  |  |
| Dice    | 0.4473  | 0.4614  | 0.4299  | 0.3098  | 0.5394  | 1.0000  | 1.0000  | 0.8020 | -0.7168 | 0.6741  | 0.7094  |  |
| Cosine  | 0.5000  | 0.4859  | 0.4599  | 0.3632  | 0.4900  | 0.8020  | 0.8020  | 1.0000 | -0.6837 | 0.6237  | 0.6760  |  |
| TER     | -0.4828 | -0.4754 | -0.4582 | -0.3634 | -0.6201 | -0.7168 | -0.7168 | 1.0000 | -0.6837 | -0.5712 | -0.6910 |  |
| CHRF    | 0.5243  | 0.5035  | 0.4674  | 0.3491  | 0.5985  | 0.6741  | 0.6741  | 0.6237 | -0.5712 | 1.0000  | 0.6435  |  |
| BLEU    | 0.4576  | 0.4499  | 0.4284  | 0.3128  | 0.5616  | 0.7094  | 0.7094  | 0.6760 | -0.6910 | 0.6435  | 1.0000  |  |
| ZhoSlk  | Distil  | MiniLM  | Mpnet   | Roberta | Leven   | Jaccard | Dice    | Cosine | TER     | CHRF    | BLEU    |  |
| Distil  | 1.0000  | 0.5671  | 0.5776  | 0.5358  | 0.4024  | 0.4133  | 0.4133  | 0.4164 | -0.3948 | 0.5227  | 0.3785  |  |
| MiniLM  | 0.5671  | 1.0000  | 0.6709  | 0.5136  | 0.4277  | 0.4845  | 0.4845  | 0.4839 | -0.4466 | 0.5918  | 0.4366  |  |
| Mpnet   | 0.5776  | 0.6709  | 1.0000  | 0.5107  | 0.3921  | 0.4191  | 0.4191  | 0.4228 | -0.3944 | 0.5347  | 0.3856  |  |
| Roberta | 0.5358  | 0.5136  | 0.5107  | 1.0000  | 0.3467  | 0.3587  | 0.3587  | 0.3711 | -0.3417 | 0.4832  | 0.3360  |  |
| Leven   | 0.4024  | 0.4277  | 0.3921  | 0.3467  | 1.0000  | 0.4865  | 0.4865  | 0.4586 | -0.5936 | 0.5666  | 0.5033  |  |
| Jaccard | 0.4133  | 0.4845  | 0.4191  | 0.3587  | 0.4865  | 1.0000  | 1.0000  | 0.8390 | -0.7104 | 0.6093  | 0.6772  |  |
| Dice    | 0.4133  | 0.4845  | 0.4191  | 0.3587  | 0.4865  | 1.0000  | 1.0000  | 0.8390 | -0.7104 | 0.6093  | 0.6772  |  |
| Cosine  | 0.4164  | 0.4839  | 0.4228  | 0.3711  | 0.4586  | 0.8390  | 0.8390  | 1.0000 | -0.6761 | 0.5869  | 0.6666  |  |
| TER     | -0.3948 | -0.4466 | -0.3944 | -0.3417 | -0.5936 | -0.7104 | -0.7104 | 1.0000 | -0.6761 | -0.5452 | -0.6728 |  |
| CHRF    | 0.5227  | 0.5918  | 0.5347  | 0.4832  | 0.5666  | 0.6093  | 0.6093  | 0.5869 | -0.5452 | 1.0000  | 0.5804  |  |
| BLEU    | 0.3785  | 0.4366  | 0.3856  | 0.3360  | 0.5033  | 0.6772  | 0.6772  | 0.6666 | -0.6728 | 0.5804  | 1.0000  |  |
| ZhoSpa  | Distil  | MiniLM  | Mpnet   | Roberta | Leven   | Jaccard | Dice    | Cosine | TER     | CHRF    | BLEU    |  |
| Distil  | 1.0000  | 0.5961  | 0.5863  | 0.4719  | 0.4036  | 0.4847  | 0.4847  | 0.4564 | -0.4597 | 0.5334  | 0.4518  |  |
| MiniLM  | 0.5961  | 1.0000  | 0.6368  | 0.4460  | 0.3818  | 0.4714  | 0.4714  | 0.4447 | -0.4407 | 0.5104  | 0.4333  |  |
| Mpnet   | 0.5863  | 0.6368  | 1.0000  | 0.4350  | 0.3779  | 0.4358  | 0.4358  | 0.3995 | -0.4189 | 0.4755  | 0.4003  |  |
| Roberta | 0.4719  | 0.4460  | 0.4350  | 1.0000  | 0.3663  | 0.4491  | 0.4491  | 0.4246 | -0.4180 | 0.4762  | 0.4007  |  |
| Leven   | 0.4036  | 0.3818  | 0.3779  | 0.3663  | 1.0000  | 0.5003  | 0.5003  | 0.4219 | -0.6490 | 0.5724  | 0.5368  |  |
| Jaccard | 0.4847  | 0.4714  | 0.4358  | 0.4491  | 0.5003  | 1.0000  | 1.0000  | 0.7014 | -0.7084 | 0.6834  | 0.6769  |  |
| Dice    | 0.4847  | 0.4714  | 0.4358  | 0.4491  | 0.5003  | 1.0000  | 1.0000  | 0.7014 | -0.7084 | 0.6834  | 0.6769  |  |
| Cosine  | 0.4564  | 0.4447  | 0.3995  | 0.4246  | 0.4279  | 0.7014  | 0.7014  | 1.0000 | -0.6345 | 0.6112  | 0.6516  |  |
| TER     | -0.4597 | -0.4407 | -0.4189 | -0.4180 | -0.6490 | -0.7084 | -0.7084 | 1.0000 | -0.6345 | -0.6246 | -0.7045 |  |
| CHRF    | 0.5334  | 0.5104  | 0.4755  | 0.4762  | 0.5724  | 0.6834  | 0.6834  | 0.6112 | -0.6246 | 1.0000  | 0.6639  |  |
| BLEU    | 0.4518  | 0.4333  | 0.4003  | 0.4007  | 0.5368  | 0.6769  | 0.6769  | 0.6516 | -0.7045 | 0.6639  | 1.0000  |  |
| ZhoTha  | Distil  | MiniLM  | Mpnet   | Roberta | Leven   | Jaccard | Dice    | Cosine | TER     | CHRF    | BLEU    |  |
| Distil  | 1.0000  | 0.3659  | 0.3683  | 0.3598  | 0.3610  | 0.3938  | 0.3938  | 0.4026 | -0.4470 | 0.3957  | 0.4029  |  |
| MiniLM  | 0.3659  | 1.0000  | 0.6031  | 0.3525  | 0.3562  | 0.4452  | 0.4452  | 0.4691 | -0.4408 | 0.4168  | 0.4210  |  |
| Mpnet   | 0.3683  | 0.6031  | 1.0000  | 0.3701  | 0.3372  | 0.3897  | 0.3897  | 0.4085 | -0.4033 | 0.3674  | 0.3768  |  |
| Roberta | 0.3598  | 0.3525  | 0.3701  | 1.0000  | 0.3141  | 0.3881  | 0.3881  | 0.4069 | -0.3688 | 0.3853  | 0.3660  |  |
| Leven   | 0.3610  | 0.3562  | 0.3372  | 0.3141  | 1.0000  | 0.5281  | 0.5281  | 0.5060 | -0.6521 | 0.5957  | 0.5932  |  |
| Jaccard | 0.3938  | 0.4452  | 0.3897  | 0.3881  | 0.5281  | 1.0000  | 1.0000  | 0.7682 | -0.7035 | 0.6979  | 0.6733  |  |
| Dice    | 0.3938  | 0.4452  | 0.3897  | 0.3881  | 0.5281  | 1.0000  | 1.0000  | 0.7682 | -0.7035 | 0.6979  | 0.6733  |  |
| Cosine  | 0.4026  | 0.4691  | 0.4085  | 0.4069  | 0.5060  | 0.7682  | 0.7682  | 1.0000 | -0.6678 | 0.6884  | 0.6590  |  |
| TER     | -0.4470 | -0.4408 | -0.4033 | -0.3688 | -0.6521 | -0.7035 | -0.7035 | 1.0000 | -0.6678 | -0.6292 | -0.6914 |  |
| CHRF    | 0.3957  | 0.4168  | 0.3674  | 0.3853  | 0.5957  | 0.6979  | 0.6979  | 0.6884 | -0.6292 | 1.0000  | 0.7470  |  |
| BLEU    | 0.4029  | 0.4210  | 0.3768  | 0.3660  | 0.5932  | 0.6733  | 0.6733  | 0.6590 | -0.6914 | 0.7470  | 1.0000  |  |
| ZhoUkr  | Distil  | MiniLM  | Mpnet   | Roberta | Leven   | Jaccard | Dice    | Cosine | TER     | CHRF    | BLEU    |  |
| Distil  | 1.0000  | 0.5561  | 0.5981  | 0.5160  | 0.3919  | 0.3956  | 0.3956  | 0.4229 | -0.4240 | 0.4721  | 0.3879  |  |
| MiniLM  | 0.5561  | 1.0000  | 0.5979  | 0.4455  | 0.3760  | 0.3971  | 0.3971  | 0.4059 | -0.4162 | 0.4239  | 0.3740  |  |
| Mpnet   | 0.5981  | 0.5979  | 1.0000  | 0.5232  | 0.3589  | 0.3743  | 0.3743  | 0.3995 | -0.4036 | 0.4100  | 0.3640  |  |
| Roberta | 0.5160  | 0.4455  | 0.5232  | 1.0000  | 0.3127  | 0.2984  | 0.2984  | 0.3299 | -0.3472 | 0.3525  | 0.2931  |  |
| Leven   | 0.3919  | 0.3760  | 0.3589  | 0.3127  | 1.0000  | 0.5086  | 0.5086  | 0.4707 | -0.5786 | 0.5800  | 0.5207  |  |
| Jaccard | 0.3956  | 0.3971  | 0.3743  | 0.2984  | 0.5086  | 1.0000  | 1.0000  | 0.8263 | -0.6799 | 0.5973  | 0.6727  |  |
| Dice    | 0.3956  | 0.3971  | 0.3743  | 0.2984  | 0.5086  | 1.0000  | 1.0000  | 0.8263 | -0.6799 | 0.5973  | 0.6727  |  |
| Cosine  | 0.4229  | 0.4059  | 0.3995  | 0.3299  | 0.4707  | 0.8263  | 0.8263  | 1.0000 | -0.6575 | 0.5552  | 0.6492  |  |
| TER     | -0.4240 | -0.4162 | -0.4036 | -0.3472 | -0.5786 | -0.6799 | -0.6799 | 1.0000 | -0.6575 | -0.4858 | -0.6524 |  |
| CHRF    | 0.4721  | 0.4239  | 0.4100  | 0.3525  | 0.5800  | 0.5973  | 0.5973  | 0.5552 | -0.4858 | 1.0000  | 0.5631  |  |
| BLEU    | 0.3879  | 0.3740  | 0.3640  | 0.2931  | 0.5207  | 0.6727  | 0.6727  | 0.6492 | -0.6524 | 0.5631  | 1.0000  |  |
| ZhoVie  | Distil  | MiniLM  | Mpnet   | Roberta | Leven   | Jaccard | Dice    | Cosine | TER     | CHRF    | BLEU    |  |
| Distil  | 1.0000  | 0.5896  | 0.6087  | 0.6130  | 0.4049  | 0.5305  | 0.5305  | 0.5616 | -0.5231 | 0.4914  | 0.5008  |  |
| MiniLM  | 0.5896  | 1.0000  | 0.6386  | 0.4772  | 0.4526  | 0.6172  | 0.6172  | 0.6243 | -0.5559 | 0.5829  | 0.5507  |  |
| Mpnet   | 0.6087  | 0.6386  | 1.0000  | 0.5394  | 0.3762  | 0.4889  | 0.4889  | 0.5059 | -0.4754 | 0.4504  | 0.4502  |  |
| Roberta | 0.6130  | 0.4772  | 0.5394  | 1.0000  | 0.3432  | 0.4437  | 0.4437  | 0.4608 | -0.4439 | 0.3885  | 0.4057  |  |
| Leven   | 0.4049  | 0.4526  | 0.3762  | 0.3432  | 1.0000  | 0.5774  | 0.5774  | 0.5503 | -0.6971 | 0.6275  | 0.6322  |  |
| Jaccard | 0.5305  | 0.6172  | 0.4889  | 0.4437  | 0.5774  | 1.0000  | 1.0000  | 0.8268 | -0.7255 | 0.7320  | 0.6914  |  |
| Dice    | 0.5305  | 0.6172  | 0.4889  | 0.4437  | 0.5774  | 1.0000  | 1.0000  | 0.8268 | -0.7255 | 0.7320  | 0.6914  |  |
| Cosine  | 0.5616  | 0.6243  | 0.5059  | 0.4608  | 0.5503  | 0.8268  | 0.8268  | 1.0000 | -0.7125 | 0.7021  | 0.6821  |  |
| TER     | -0.5231 | -0.5559 | -0.4754 | -0.4439 | -0.6971 | -0.7255 | -0.7255 | 1.0000 | -0.6493 | -0.6493 | -0.7082 |  |
| CHRF    | 0.4914  | 0.5829  | 0.4504  | 0.3885  | 0.6275  | 0.7320  | 0.7320  | 0.7021 | -0.6493 | 1.0000  | 0.7670  |  |
| BLEU    | 0.5008  | 0.5507  | 0.4502  | 0.4057  | 0.6322  | 0.6914  | 0.6914  | 0.6821 | -0.7082 | 0.7670  | 1.0000  |  |

6. Spearman Correlation Coefficient (ZhoX)

|         |         |         |         |         |         |         |         |         |         |         |         |  |
|---------|---------|---------|---------|---------|---------|---------|---------|---------|---------|---------|---------|--|
| ZhoAra  | Distil  | MiniLM  | Mpnet   | Roberta | Leven   | Jaccard | Dice    | Cosine  | TER     | CHRF    | BLEU    |  |
| Distil  | 1.0000  | 0.5372  | 0.6466  | 0.5544  | 0.5563  | 0.4855  | 0.4855  | 0.4595  | -0.5427 | 0.5520  | 0.4541  |  |
| MiniLM  | 0.5372  | 1.0000  | 0.6517  | 0.5359  | 0.5045  | 0.5349  | 0.5349  | 0.5317  | -0.5287 | 0.5498  | 0.4827  |  |
| Mpnet   | 0.6466  | 0.6517  | 1.0000  | 0.6009  | 0.5353  | 0.5513  | 0.5513  | 0.5395  | -0.5623 | 0.5641  | 0.5190  |  |
| Roberta | 0.5544  | 0.5359  | 0.6009  | 1.0000  | 0.4641  | 0.4681  | 0.4681  | 0.4831  | -0.4645 | 0.5344  | 0.4363  |  |
| Leven   | 0.5563  | 0.5045  | 0.5353  | 0.4641  | 1.0000  | 0.7045  | 0.7045  | 0.6612  | -0.8090 | 0.7756  | 0.7192  |  |
| Jaccard | 0.4855  | 0.5349  | 0.5513  | 0.4681  | 0.7045  | 1.0000  | 1.0000  | 0.9474  | -0.8861 | 0.8283  | 0.8666  |  |
| Dice    | 0.4855  | 0.5349  | 0.5513  | 0.4681  | 0.7045  | 1.0000  | 1.0000  | 0.9474  | -0.8861 | 0.8283  | 0.8666  |  |
| Cosine  | 0.4595  | 0.5317  | 0.5395  | 0.4831  | 0.6612  | 0.9474  | 0.9474  | 1.0000  | -0.8611 | 0.7935  | 0.8615  |  |
| TER     | -0.5427 | -0.5287 | -0.5623 | -0.4645 | -0.8090 | -0.8861 | -0.8861 | -0.8611 | 1.0000  | -0.7492 | -0.8564 |  |
| CHRF    | 0.5520  | 0.5498  | 0.5641  | 0.5344  | 0.7756  | 0.8283  | 0.8283  | 0.7935  | -0.7492 | 1.0000  | 0.8046  |  |
| BLEU    | 0.4541  | 0.4827  | 0.5190  | 0.4363  | 0.7192  | 0.8666  | 0.8666  | 0.8615  | -0.8564 | 0.8046  | 1.0000  |  |

|         |         |         |         |         |         |         |         |         |         |         |         |  |
|---------|---------|---------|---------|---------|---------|---------|---------|---------|---------|---------|---------|--|
| ZhoCes  | Distil  | MiniLM  | Mpnet   | Roberta | Leven   | Jaccard | Dice    | Cosine  | TER     | CHRF    | BLEU    |  |
| Distil  | 1.0000  | 0.7551  | 0.7683  | 0.7438  | 0.5474  | 0.5648  | 0.5648  | 0.5698  | -0.5436 | 0.6913  | 0.5236  |  |
| MiniLM  | 0.7551  | 1.0000  | 0.8590  | 0.6895  | 0.5978  | 0.6783  | 0.6783  | 0.6786  | -0.6320 | 0.7840  | 0.6178  |  |
| Mpnet   | 0.7683  | 0.8590  | 1.0000  | 0.6863  | 0.5571  | 0.6063  | 0.6063  | 0.6105  | -0.5716 | 0.7232  | 0.5567  |  |
| Roberta | 0.7438  | 0.6895  | 0.6863  | 1.0000  | 0.4950  | 0.5129  | 0.5129  | 0.5281  | -0.4909 | 0.6495  | 0.4824  |  |
| Leven   | 0.5474  | 0.5978  | 0.5571  | 0.4950  | 1.0000  | 0.6572  | 0.6572  | 0.6306  | -0.7864 | 0.7452  | 0.6900  |  |
| Jaccard | 0.5648  | 0.6783  | 0.6063  | 0.5129  | 0.6572  | 1.0000  | 1.0000  | 0.9492  | -0.8791 | 0.8062  | 0.8568  |  |
| Dice    | 0.5648  | 0.6783  | 0.6063  | 0.5129  | 0.6572  | 1.0000  | 1.0000  | 0.9492  | -0.8791 | 0.8062  | 0.8568  |  |
| Cosine  | 0.5698  | 0.6786  | 0.6105  | 0.5281  | 0.6306  | 0.9492  | 0.9492  | 1.0000  | -0.8572 | 0.7870  | 0.8526  |  |
| TER     | -0.5436 | -0.6320 | -0.5716 | -0.4909 | -0.7864 | -0.8791 | -0.8791 | -0.8572 | 1.0000  | -0.7409 | -0.8558 |  |
| CHRF    | 0.6913  | 0.7840  | 0.7232  | 0.6495  | 0.7452  | 0.8062  | 0.8062  | 0.7870  | -0.7409 | 1.0000  | 0.7813  |  |
| BLEU    | 0.5236  | 0.6178  | 0.5567  | 0.4824  | 0.6900  | 0.8568  | 0.8568  | 0.8526  | -0.8558 | 0.7813  | 1.0000  |  |

|         |         |         |         |         |         |         |         |         |         |         |         |  |
|---------|---------|---------|---------|---------|---------|---------|---------|---------|---------|---------|---------|--|
| ZhoEng  | Distil  | MiniLM  | Mpnet   | Roberta | Leven   | Jaccard | Dice    | Cosine  | TER     | CHRF    | BLEU    |  |
| Distil  | 1.0000  | 0.9168  | 0.9058  | 0.8127  | 0.6085  | 0.7019  | 0.7019  | 0.6865  | -0.6646 | 0.7344  | 0.6544  |  |
| MiniLM  | 0.9168  | 1.0000  | 0.9019  | 0.7921  | 0.6013  | 0.7050  | 0.7050  | 0.6732  | -0.6502 | 0.7310  | 0.6362  |  |
| Mpnet   | 0.9058  | 0.9019  | 1.0000  | 0.8051  | 0.5910  | 0.6808  | 0.6808  | 0.6607  | -0.6423 | 0.7134  | 0.6309  |  |
| Roberta | 0.8127  | 0.7921  | 0.8051  | 1.0000  | 0.5965  | 0.6607  | 0.6607  | 0.6319  | -0.6436 | 0.6760  | 0.6164  |  |
| Leven   | 0.6085  | 0.6013  | 0.5910  | 0.5965  | 1.0000  | 0.7505  | 0.7505  | 0.7057  | -0.8697 | 0.7871  | 0.7878  |  |
| Jaccard | 0.7019  | 0.7050  | 0.6808  | 0.6607  | 0.7505  | 1.0000  | 1.0000  | 0.9273  | -0.9007 | 0.8704  | 0.8829  |  |
| Dice    | 0.7019  | 0.7050  | 0.6808  | 0.6607  | 0.7505  | 1.0000  | 1.0000  | 0.9273  | -0.9007 | 0.8704  | 0.8829  |  |
| Cosine  | 0.6865  | 0.6732  | 0.6607  | 0.6319  | 0.7057  | 0.9273  | 0.9273  | 1.0000  | -0.8688 | 0.8479  | 0.8793  |  |
| TER     | -0.6646 | -0.6502 | -0.6423 | -0.6436 | -0.8697 | -0.9007 | -0.9007 | -0.8688 | 1.0000  | -0.8128 | -0.8940 |  |
| CHRF    | 0.7344  | 0.7310  | 0.7134  | 0.6760  | 0.7871  | 0.8704  | 0.8704  | 0.8479  | -0.8128 | 1.0000  | 0.8690  |  |
| BLEU    | 0.6544  | 0.6362  | 0.6309  | 0.6164  | 0.7878  | 0.8829  | 0.8829  | 0.8793  | -0.8940 | 0.8690  | 1.0000  |  |

|         |         |         |         |         |         |         |         |         |         |         |         |  |
|---------|---------|---------|---------|---------|---------|---------|---------|---------|---------|---------|---------|--|
| ZhoFil  | Distil  | MiniLM  | Mpnet   | Roberta | Leven   | Jaccard | Dice    | Cosine  | TER     | CHRF    | BLEU    |  |
| Distil  | 1.0000  | 0.8109  | 0.8452  | 0.7197  | 0.5320  | 0.6679  | 0.6679  | 0.6527  | -0.6005 | 0.6859  | 0.5861  |  |
| MiniLM  | 0.8109  | 1.0000  | 0.8145  | 0.7095  | 0.5749  | 0.7239  | 0.7239  | 0.6962  | -0.6462 | 0.7285  | 0.6331  |  |
| Mpnet   | 0.8452  | 0.8145  | 1.0000  | 0.6761  | 0.4725  | 0.6026  | 0.6026  | 0.5556  | -0.5317 | 0.6045  | 0.5197  |  |
| Roberta | 0.7197  | 0.7095  | 0.6761  | 1.0000  | 0.4863  | 0.6005  | 0.6005  | 0.5912  | -0.5539 | 0.6038  | 0.5172  |  |
| Leven   | 0.5320  | 0.5749  | 0.4725  | 0.4863  | 1.0000  | 0.6760  | 0.6760  | 0.6027  | -0.8005 | 0.7466  | 0.7532  |  |
| Jaccard | 0.6679  | 0.7239  | 0.6026  | 0.6005  | 0.6760  | 1.0000  | 1.0000  | 0.8293  | -0.8211 | 0.8242  | 0.8127  |  |
| Dice    | 0.6679  | 0.7239  | 0.6026  | 0.6005  | 0.6760  | 1.0000  | 1.0000  | 0.8293  | -0.8211 | 0.8242  | 0.8127  |  |
| Cosine  | 0.6527  | 0.6962  | 0.5556  | 0.5912  | 0.6027  | 0.8293  | 0.8293  | 1.0000  | -0.7779 | 0.7699  | 0.7799  |  |
| TER     | -0.6005 | -0.6462 | -0.5317 | -0.5539 | -0.8005 | -0.8211 | -0.8211 | -0.7779 | 1.0000  | -0.7145 | -0.8443 |  |
| CHRF    | 0.6859  | 0.7285  | 0.6045  | 0.6038  | 0.7466  | 0.8242  | 0.8242  | 0.7699  | -0.7145 | 1.0000  | 0.8172  |  |
| BLEU    | 0.5861  | 0.6331  | 0.5197  | 0.5172  | 0.7532  | 0.8127  | 0.8127  | 0.7799  | -0.8443 | 0.8172  | 1.0000  |  |

|         |         |         |         |         |         |         |         |         |         |         |         |  |
|---------|---------|---------|---------|---------|---------|---------|---------|---------|---------|---------|---------|--|
| ZhoFra  | Distil  | MiniLM  | Mpnet   | Roberta | Leven   | Jaccard | Dice    | Cosine  | TER     | CHRF    | BLEU    |  |
| Distil  | 1.0000  | 0.8289  | 0.8067  | 0.6865  | 0.6168  | 0.7103  | 0.7103  | 0.6752  | -0.6774 | 0.7572  | 0.6714  |  |
| MiniLM  | 0.8289  | 1.0000  | 0.8548  | 0.6723  | 0.5994  | 0.6985  | 0.6985  | 0.6494  | -0.6518 | 0.7439  | 0.6450  |  |
| Mpnet   | 0.8067  | 0.8548  | 1.0000  | 0.6620  | 0.5854  | 0.6559  | 0.6559  | 0.6045  | -0.6226 | 0.6955  | 0.6050  |  |
| Roberta | 0.6865  | 0.6723  | 0.6620  | 1.0000  | 0.5521  | 0.6506  | 0.6506  | 0.6114  | -0.6026 | 0.6843  | 0.5997  |  |
| Leven   | 0.6168  | 0.5994  | 0.5854  | 0.5521  | 1.0000  | 0.7148  | 0.7148  | 0.6341  | -0.8244 | 0.7627  | 0.7314  |  |
| Jaccard | 0.7103  | 0.6985  | 0.6559  | 0.6506  | 0.7148  | 1.0000  | 1.0000  | 0.8955  | -0.8822 | 0.8603  | 0.8790  |  |
| Dice    | 0.7103  | 0.6985  | 0.6559  | 0.6506  | 0.7148  | 1.0000  | 1.0000  | 0.8955  | -0.8822 | 0.8603  | 0.8790  |  |
| Cosine  | 0.6752  | 0.6494  | 0.6045  | 0.6114  | 0.6341  | 0.8955  | 0.8955  | 1.0000  | -0.8332 | 0.8025  | 0.8725  |  |
| TER     | -0.6774 | -0.6518 | -0.6226 | -0.6026 | -0.8244 | -0.8822 | -0.8822 | -0.8332 | 1.0000  | -0.7845 | -0.8764 |  |
| CHRF    | 0.7572  | 0.7439  | 0.6955  | 0.6843  | 0.7627  | 0.8603  | 0.8603  | 0.8025  | -0.7845 | 1.0000  | 0.8458  |  |
| BLEU    | 0.6714  | 0.6450  | 0.6050  | 0.5997  | 0.7314  | 0.8790  | 0.8790  | 0.8725  | -0.8764 | 0.8458  | 1.0000  |  |

|         |         |         |         |         |         |         |         |         |         |         |         |  |
|---------|---------|---------|---------|---------|---------|---------|---------|---------|---------|---------|---------|--|
| ZhoInd  | Distil  | MiniLM  | Mpnet   | Roberta | Leven   | Jaccard | Dice    | Cosine  | TER     | CHRF    | BLEU    |  |
| Distil  | 1.0000  | 0.7970  | 0.8209  | 0.7343  | 0.5899  | 0.7122  | 0.7122  | 0.7271  | -0.6820 | 0.6844  | 0.6329  |  |
| MiniLM  | 0.7970  | 1.0000  | 0.8518  | 0.7083  | 0.6148  | 0.7603  | 0.7603  | 0.7581  | -0.6975 | 0.7329  | 0.6611  |  |
| Mpnet   | 0.8209  | 0.8518  | 1.0000  | 0.6993  | 0.5785  | 0.7101  | 0.7101  | 0.7144  | -0.6608 | 0.6835  | 0.6241  |  |
| Roberta | 0.7343  | 0.7083  | 0.6993  | 1.0000  | 0.5191  | 0.6496  | 0.6496  | 0.6536  | -0.6051 | 0.6295  | 0.5607  |  |
| Leven   | 0.5899  | 0.6148  | 0.5785  | 0.5191  | 1.0000  | 0.7216  | 0.7216  | 0.6851  | -0.8307 | 0.7851  | 0.7654  |  |
| Jaccard | 0.7122  | 0.7603  | 0.7101  | 0.6496  | 0.7216  | 1.0000  | 1.0000  | 0.9375  | -0.8665 | 0.8535  | 0.8356  |  |
| Dice    | 0.7122  | 0.7603  | 0.7101  | 0.6496  | 0.7216  | 1.0000  | 1.0000  | 0.9375  | -0.8665 | 0.8535  | 0.8356  |  |
| Cosine  | 0.7271  | 0.7581  | 0.7144  | 0.6536  | 0.6851  | 0.9375  | 0.9375  | 1.0000  | -0.8606 | 0.8151  | 0.8285  |  |
| TER     | -0.6820 | -0.6975 | -0.6608 | -0.6051 | -0.8307 | -0.8665 | -0.8665 | -0.8606 | 1.0000  | -0.7424 | -0.8444 |  |
| CHRF    | 0.6844  | 0.7329  | 0.6835  | 0.6295  | 0.7851  | 0.8535  | 0.8535  | 0.8151  | -0.7424 | 1.0000  | 0.8250  |  |
| BLEU    | 0.6329  | 0.6611  | 0.6241  | 0.5607  | 0.7654  | 0.8356  | 0.8356  | 0.8285  | -0.8444 | 0.8250  | 1.0000  |  |

| ZhoIta  | Distil  | MiniLM  | Mpnet   | Roberta | Leven   | Jaccard | Dice    | Cosine  | TER     | CHRF    | BLEU    |
|---------|---------|---------|---------|---------|---------|---------|---------|---------|---------|---------|---------|
| Distil  | 1.0000  | 0.8341  | 0.8249  | 0.7295  | 0.6379  | 0.7202  | 0.7202  | 0.7157  | -0.6871 | 0.7456  | 0.6703  |
| MiniLM  | 0.8341  | 1.0000  | 0.8468  | 0.7162  | 0.6546  | 0.7622  | 0.7622  | 0.7493  | -0.6987 | 0.7945  | 0.6987  |
| Mpnet   | 0.8249  | 0.8468  | 1.0000  | 0.6934  | 0.6104  | 0.6867  | 0.6867  | 0.6697  | -0.6502 | 0.7066  | 0.6337  |
| Roberta | 0.7295  | 0.7162  | 0.6934  | 1.0000  | 0.5866  | 0.6597  | 0.6597  | 0.6511  | -0.6206 | 0.6965  | 0.6055  |
| Leven   | 0.6379  | 0.6546  | 0.6104  | 0.5866  | 1.0000  | 0.7349  | 0.7349  | 0.6987  | -0.8241 | 0.7785  | 0.7700  |
| Jaccard | 0.7202  | 0.7622  | 0.6867  | 0.6597  | 0.7349  | 1.0000  | 1.0000  | 0.9456  | -0.8806 | 0.8568  | 0.8726  |
| Dice    | 0.7202  | 0.7622  | 0.6867  | 0.6597  | 0.7349  | 1.0000  | 1.0000  | 0.9456  | -0.8806 | 0.8568  | 0.8726  |
| Cosine  | 0.7157  | 0.7493  | 0.6697  | 0.6511  | 0.6987  | 0.9456  | 0.9456  | 1.0000  | -0.8647 | 0.8240  | 0.8614  |
| TER     | -0.6871 | -0.6987 | -0.6502 | -0.6206 | -0.8241 | -0.8806 | -0.8806 | -0.8647 | 1.0000  | -0.7497 | -0.8677 |
| CHRF    | 0.7456  | 0.7945  | 0.7066  | 0.6965  | 0.7785  | 0.8568  | 0.8568  | 0.8240  | -0.7497 | 1.0000  | 0.8373  |
| BLEU    | 0.6703  | 0.6987  | 0.6337  | 0.6055  | 0.7700  | 0.8726  | 0.8726  | 0.8614  | -0.8677 | 0.8373  | 1.0000  |

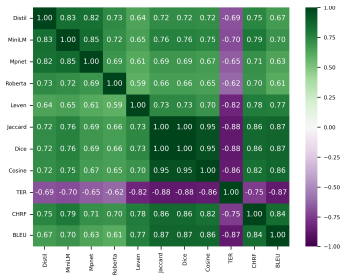

| ZhoKaz  | Distil  | MiniLM  | Mpnet   | Roberta | Leven   | Jaccard | Dice    | Cosine  | TER     | CHRF    | BLEU    |
|---------|---------|---------|---------|---------|---------|---------|---------|---------|---------|---------|---------|
| Distil  | 1.0000  | 0.5436  | 0.5927  | 0.6782  | 0.4407  | 0.4771  | 0.4771  | 0.4754  | -0.4603 | 0.6218  | 0.4204  |
| MiniLM  | 0.5436  | 1.0000  | 0.8280  | 0.5175  | 0.4242  | 0.5214  | 0.5214  | 0.5177  | -0.4715 | 0.5471  | 0.4607  |
| Mpnet   | 0.5927  | 0.8280  | 1.0000  | 0.5490  | 0.4192  | 0.5326  | 0.5326  | 0.5328  | -0.4850 | 0.5508  | 0.4793  |
| Roberta | 0.6782  | 0.5175  | 0.5490  | 1.0000  | 0.4235  | 0.4497  | 0.4497  | 0.4565  | -0.4118 | 0.6142  | 0.3826  |
| Leven   | 0.4407  | 0.4242  | 0.4192  | 0.4235  | 1.0000  | 0.6219  | 0.6219  | 0.5755  | -0.7365 | 0.6794  | 0.6211  |
| Jaccard | 0.4771  | 0.5214  | 0.5326  | 0.4497  | 0.6219  | 1.0000  | 1.0000  | 0.9481  | -0.8385 | 0.7651  | 0.8413  |
| Dice    | 0.4771  | 0.5214  | 0.5326  | 0.4497  | 0.6219  | 1.0000  | 1.0000  | 0.9481  | -0.8385 | 0.7651  | 0.8413  |
| Cosine  | 0.4754  | 0.5177  | 0.5328  | 0.4565  | 0.5755  | 0.9481  | 0.9481  | 1.0000  | -0.8081 | 0.7392  | 0.8330  |
| TER     | -0.4603 | -0.4715 | -0.4850 | -0.4118 | -0.7365 | -0.8385 | -0.8385 | -0.8081 | 1.0000  | -0.6350 | -0.8102 |
| CHRF    | 0.6218  | 0.5471  | 0.5508  | 0.6142  | 0.6794  | 0.7651  | 0.7651  | 0.7392  | -0.6350 | 1.0000  | 0.6984  |
| BLEU    | 0.4204  | 0.4607  | 0.4793  | 0.3826  | 0.6211  | 0.8413  | 0.8413  | 0.8330  | -0.8102 | 0.6984  | 1.0000  |

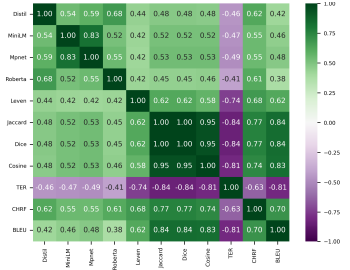

| ZhoKhm  | Distil  | MiniLM  | Mpnet   | Roberta | Leven   | Jaccard | Dice    | Cosine  | TER     | CHRF    | BLEU    |
|---------|---------|---------|---------|---------|---------|---------|---------|---------|---------|---------|---------|
| Distil  | 1.0000  | 0.6222  | 0.6062  | 0.5698  | 0.3594  | 0.4242  | 0.4242  | 0.4509  | -0.4425 | 0.4887  | 0.4023  |
| MiniLM  | 0.6222  | 1.0000  | 0.9809  | 0.3628  | 0.2396  | 0.3065  | 0.3065  | 0.3167  | -0.3952 | 0.2938  | 0.3216  |
| Mpnet   | 0.6062  | 0.9809  | 1.0000  | 0.3754  | 0.2359  | 0.3031  | 0.3031  | 0.3126  | -0.3896 | 0.2968  | 0.3194  |
| Roberta | 0.5698  | 0.3628  | 0.3754  | 1.0000  | 0.4119  | 0.4696  | 0.4696  | 0.4864  | -0.4417 | 0.5327  | 0.4303  |
| Leven   | 0.3594  | 0.2396  | 0.2359  | 0.4119  | 1.0000  | 0.7046  | 0.7046  | 0.6807  | -0.8158 | 0.7681  | 0.7467  |
| Jaccard | 0.4242  | 0.3065  | 0.3031  | 0.4696  | 0.7046  | 1.0000  | 1.0000  | 0.9369  | -0.8599 | 0.8255  | 0.8200  |
| Dice    | 0.4242  | 0.3065  | 0.3031  | 0.4696  | 0.7046  | 1.0000  | 1.0000  | 0.9369  | -0.8599 | 0.8255  | 0.8200  |
| Cosine  | 0.4509  | 0.3167  | 0.3126  | 0.4864  | 0.6807  | 0.9369  | 0.9369  | 1.0000  | -0.8407 | 0.8085  | 0.8086  |
| TER     | -0.4425 | -0.3952 | -0.3896 | -0.4417 | -0.8158 | -0.8599 | -0.8599 | -0.8407 | 1.0000  | -0.7279 | -0.8180 |
| CHRF    | 0.4887  | 0.2938  | 0.2968  | 0.5327  | 0.7681  | 0.8255  | 0.8255  | 0.8085  | -0.7279 | 1.0000  | 0.8156  |
| BLEU    | 0.4023  | 0.3216  | 0.3194  | 0.4303  | 0.7467  | 0.8200  | 0.8200  | 0.8086  | -0.8180 | 0.8156  | 1.0000  |

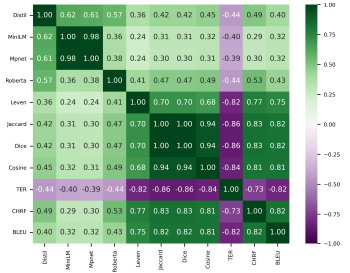

| ZhoKir  | Distil  | MiniLM  | Mpnet   | Roberta | Leven   | Jaccard | Dice    | Cosine  | TER     | CHRF    | BLEU    |
|---------|---------|---------|---------|---------|---------|---------|---------|---------|---------|---------|---------|
| Distil  | 1.0000  | 0.5314  | 0.5539  | 0.5756  | 0.3780  | 0.4297  | 0.4297  | 0.4372  | -0.3829 | 0.5435  | 0.3685  |
| MiniLM  | 0.5314  | 1.0000  | 0.7985  | 0.5879  | 0.4949  | 0.5439  | 0.5439  | 0.5406  | -0.5014 | 0.6269  | 0.4702  |
| Mpnet   | 0.5539  | 0.7985  | 1.0000  | 0.5753  | 0.4592  | 0.5249  | 0.5249  | 0.5318  | -0.4776 | 0.5863  | 0.4724  |
| Roberta | 0.5756  | 0.5879  | 0.5753  | 1.0000  | 0.3771  | 0.4148  | 0.4148  | 0.4335  | -0.3558 | 0.5965  | 0.3395  |
| Leven   | 0.3780  | 0.4949  | 0.4592  | 0.3771  | 1.0000  | 0.6137  | 0.6137  | 0.5537  | -0.7094 | 0.6688  | 0.5979  |
| Jaccard | 0.4297  | 0.5439  | 0.5249  | 0.4148  | 0.6137  | 1.0000  | 1.0000  | 0.9318  | -0.8211 | 0.7385  | 0.8335  |
| Dice    | 0.4297  | 0.5439  | 0.5249  | 0.4148  | 0.6137  | 1.0000  | 1.0000  | 0.9318  | -0.8211 | 0.7385  | 0.8335  |
| Cosine  | 0.4372  | 0.5406  | 0.5318  | 0.4335  | 0.5537  | 0.9318  | 0.9318  | 1.0000  | -0.7809 | 0.7108  | 0.8143  |
| TER     | -0.3829 | -0.5014 | -0.4776 | -0.3558 | -0.7094 | -0.8211 | -0.8211 | -0.7809 | 1.0000  | -0.5859 | -0.7887 |
| CHRF    | 0.5435  | 0.6269  | 0.5863  | 0.5965  | 0.6688  | 0.7385  | 0.7385  | 0.7108  | -0.5859 | 1.0000  | 0.6646  |
| BLEU    | 0.3685  | 0.4702  | 0.4724  | 0.3395  | 0.5979  | 0.8335  | 0.8335  | 0.8143  | -0.7887 | 0.6646  | 1.0000  |

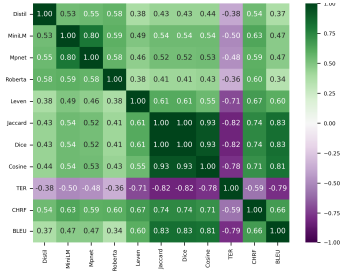

| ZhoLao  | Distil  | MiniLM  | Mpnet   | Roberta | Leven   | Jaccard | Dice    | Cosine  | TER     | CHRF    | BLEU    |
|---------|---------|---------|---------|---------|---------|---------|---------|---------|---------|---------|---------|
| Distil  | 1.0000  | 0.4305  | 0.3212  | 0.6263  | 0.4855  | 0.6126  | 0.6126  | 0.6644  | -0.6433 | 0.6945  | 0.6370  |
| MiniLM  | 0.4305  | 1.0000  | 0.9225  | 0.2698  | 0.3079  | 0.3422  | 0.3422  | 0.3027  | -0.4127 | 0.2511  | 0.3207  |
| Mpnet   | 0.3212  | 0.9225  | 1.0000  | 0.1945  | 0.2967  | 0.2827  | 0.2827  | 0.2413  | -0.3572 | 0.1970  | 0.2745  |
| Roberta | 0.6263  | 0.2698  | 0.1945  | 1.0000  | 0.4653  | 0.5243  | 0.5243  | 0.5342  | -0.4770 | 0.6147  | 0.4896  |
| Leven   | 0.4855  | 0.3079  | 0.2967  | 0.4653  | 1.0000  | 0.7105  | 0.7105  | 0.6623  | -0.6971 | 0.7407  | 0.6919  |
| Jaccard | 0.6126  | 0.3422  | 0.2827  | 0.5243  | 0.7105  | 1.0000  | 1.0000  | 0.9068  | -0.8428 | 0.8408  | 0.8665  |
| Dice    | 0.6126  | 0.3422  | 0.2827  | 0.5243  | 0.7105  | 1.0000  | 1.0000  | 0.9068  | -0.8428 | 0.8408  | 0.8665  |
| Cosine  | 0.6644  | 0.3027  | 0.2413  | 0.5342  | 0.6623  | 0.9068  | 0.9068  | 1.0000  | -0.9026 | 0.8634  | 0.9297  |
| TER     | -0.6433 | -0.4127 | -0.3572 | -0.4770 | -0.6971 | -0.8428 | -0.8428 | -0.9026 | 1.0000  | -0.7721 | -0.9103 |
| CHRF    | 0.6945  | 0.2511  | 0.1970  | 0.6147  | 0.7407  | 0.8408  | 0.8408  | 0.8634  | -0.7721 | 1.0000  | 0.8508  |
| BLEU    | 0.6370  | 0.3207  | 0.2745  | 0.4896  | 0.6919  | 0.8665  | 0.8665  | 0.9297  | -0.9103 | 0.8508  | 1.0000  |

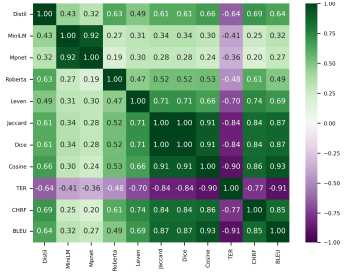

| ZhoMsa  | Distil  | MiniLM  | Mpnet   | Roberta | Leven   | Jaccard | Dice    | Cosine  | TER     | CHRF    | BLEU    |
|---------|---------|---------|---------|---------|---------|---------|---------|---------|---------|---------|---------|
| Distil  | 1.0000  | 0.8168  | 0.8336  | 0.7619  | 0.6276  | 0.7464  | 0.7464  | 0.7591  | -0.7153 | 0.7266  | 0.6794  |
| MiniLM  | 0.8168  | 1.0000  | 0.8681  | 0.7469  | 0.6513  | 0.7920  | 0.7920  | 0.7912  | -0.7281 | 0.7747  | 0.7082  |
| Mpnet   | 0.8336  | 0.8681  | 1.0000  | 0.7355  | 0.6143  | 0.7387  | 0.7387  | 0.7453  | -0.6935 | 0.7209  | 0.6691  |
| Roberta | 0.7619  | 0.7469  | 0.7355  | 1.0000  | 0.5665  | 0.6984  | 0.6984  | 0.7049  | -0.6483 | 0.6979  | 0.6233  |
| Leven   | 0.6276  | 0.6513  | 0.6143  | 0.5665  | 1.0000  | 0.7440  | 0.7440  | 0.7132  | -0.8360 | 0.7960  | 0.7780  |
| Jaccard | 0.7464  | 0.7920  | 0.7387  | 0.6984  | 0.7440  | 1.0000  | 1.0000  | 0.9480  | -0.8774 | 0.8883  | 0.8724  |
| Dice    | 0.7464  | 0.7920  | 0.7387  | 0.6984  | 0.7440  | 1.0000  | 1.0000  | 0.9480  | -0.8774 | 0.8883  | 0.8724  |
| Cosine  | 0.7591  | 0.7912  | 0.7453  | 0.7049  | 0.7132  | 0.9480  | 0.9480  | 1.0000  | -0.8764 | 0.8553  | 0.8646  |
| TER     | -0.7153 | -0.7281 | -0.6935 | -0.6483 | -0.8360 | -0.8774 | -0.8774 | -0.8764 | 1.0000  | -0.7728 | -0.8641 |
| CHRF    | 0.7266  | 0.7747  | 0.7209  | 0.6979  | 0.7960  | 0.8883  | 0.8883  | 0.8553  | -0.7728 | 1.0000  | 0.8547  |
| BLEU    | 0.6794  | 0.7082  | 0.6691  | 0.6233  | 0.7780  | 0.8724  | 0.8724  | 0.8646  | -0.8641 | 0.8547  | 1.0000  |

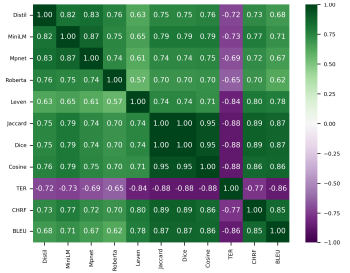

| ZhoMya  | Distil  | MiniLM  | Mpnet   | Roberta | Leven   | Jaccard | Dice    | Cosine  | TER     | CHRF    | BLEU    |
|---------|---------|---------|---------|---------|---------|---------|---------|---------|---------|---------|---------|
| Distil  | 1.0000  | 0.3210  | 0.1857  | 0.6141  | 0.3086  | 0.4398  | 0.4398  | 0.4639  | -0.4467 | 0.4674  | 0.4542  |
| MiniLM  | 0.3210  | 1.0000  | 0.9291  | 0.2227  | 0.2536  | 0.2935  | 0.2935  | 0.2626  | -0.3298 | 0.2376  | 0.2692  |
| Mpnet   | 0.1857  | 0.9291  | 1.0000  | 0.1146  | 0.2304  | 0.2253  | 0.2253  | 0.1768  | -0.2769 | 0.1601  | 0.1912  |
| Roberta | 0.6141  | 0.2227  | 0.1146  | 1.0000  | 0.3876  | 0.5552  | 0.5552  | 0.5920  | -0.4623 | 0.6044  | 0.5511  |
| Leven   | 0.3086  | 0.2536  | 0.2304  | 0.3876  | 1.0000  | 0.6404  | 0.6404  | 0.5631  | -0.7482 | 0.6493  | 0.6680  |
| Jaccard | 0.4398  | 0.2935  | 0.2253  | 0.5552  | 0.6404  | 1.0000  | 1.0000  | 0.8541  | -0.7960 | 0.8481  | 0.8491  |
| Dice    | 0.4398  | 0.2935  | 0.2253  | 0.5552  | 0.6404  | 1.0000  | 1.0000  | 0.8541  | -0.7960 | 0.8481  | 0.8491  |
| Cosine  | 0.4639  | 0.2626  | 0.1768  | 0.5920  | 0.5631  | 0.8541  | 0.8541  | 1.0000  | -0.7136 | 0.8181  | 0.8266  |
| TER     | -0.4467 | -0.3298 | -0.2769 | -0.4623 | -0.7482 | -0.7960 | -0.7960 | -0.7136 | 1.0000  | -0.6409 | -0.7719 |
| CHRF    | 0.4674  | 0.2376  | 0.1601  | 0.6044  | 0.6493  | 0.8481  | 0.8481  | 0.8181  | -0.6409 | 1.0000  | 0.8884  |
| BLEU    | 0.4542  | 0.2692  | 0.1912  | 0.5511  | 0.6680  | 0.8491  | 0.8491  | 0.8266  | -0.7719 | 0.8884  | 1.0000  |

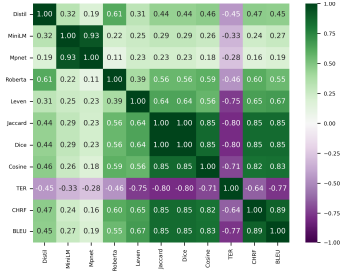

| ZhoPol  | Distil  | MiniLM  | Mpnet   | Roberta | Leven   | Jaccard | Dice    | Cosine  | TER     | CHRF    | BLEU    |
|---------|---------|---------|---------|---------|---------|---------|---------|---------|---------|---------|---------|
| Distil  | 1.0000  | 0.7694  | 0.7794  | 0.7092  | 0.5696  | 0.5810  | 0.5810  | 0.5847  | -0.5544 | 0.6919  | 0.5368  |
| MiniLM  | 0.7694  | 1.0000  | 0.8386  | 0.6876  | 0.5865  | 0.6328  | 0.6328  | 0.6323  | -0.5888 | 0.7454  | 0.5786  |
| Mpnet   | 0.7794  | 0.8386  | 1.0000  | 0.6709  | 0.5421  | 0.5642  | 0.5642  | 0.5646  | -0.5313 | 0.6835  | 0.5199  |
| Roberta | 0.7092  | 0.6876  | 0.6709  | 1.0000  | 0.5065  | 0.5144  | 0.5144  | 0.5260  | -0.4863 | 0.6603  | 0.4748  |
| Leven   | 0.5696  | 0.5865  | 0.5421  | 0.5065  | 1.0000  | 0.6719  | 0.6719  | 0.6398  | -0.7790 | 0.7548  | 0.6952  |
| Jaccard | 0.5810  | 0.6328  | 0.5642  | 0.5144  | 0.6719  | 1.0000  | 1.0000  | 0.9490  | -0.8731 | 0.7966  | 0.8585  |
| Dice    | 0.5810  | 0.6328  | 0.5642  | 0.5144  | 0.6719  | 1.0000  | 1.0000  | 0.9490  | -0.8731 | 0.7966  | 0.8585  |
| Cosine  | 0.5847  | 0.6323  | 0.5646  | 0.5260  | 0.6398  | 0.9490  | 0.9490  | 1.0000  | -0.8476 | 0.7755  | 0.8516  |
| TER     | -0.5544 | -0.5888 | -0.5313 | -0.4863 | -0.7790 | -0.8731 | -0.8731 | -0.8476 | 1.0000  | -0.7160 | -0.8511 |
| CHRF    | 0.6919  | 0.7454  | 0.6835  | 0.6603  | 0.7548  | 0.7966  | 0.7966  | 0.7755  | -0.7160 | 1.0000  | 0.7634  |
| BLEU    | 0.5368  | 0.5786  | 0.5199  | 0.4748  | 0.6952  | 0.8585  | 0.8585  | 0.8516  | -0.8511 | 0.7634  | 1.0000  |

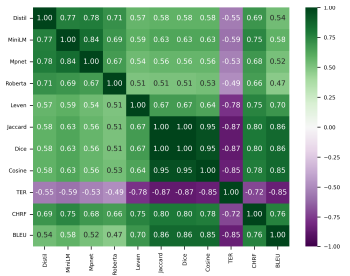

| ZhoRus  | Distil  | MiniLM  | Mpnet   | Roberta | Leven   | Jaccard | Dice    | Cosine  | TER     | CHRF    | BLEU    |
|---------|---------|---------|---------|---------|---------|---------|---------|---------|---------|---------|---------|
| Distil  | 1.0000  | 0.7954  | 0.7938  | 0.7238  | 0.5809  | 0.6186  | 0.6186  | 0.6851  | -0.6618 | 0.6951  | 0.6353  |
| MiniLM  | 0.7954  | 1.0000  | 0.8150  | 0.6163  | 0.5783  | 0.6366  | 0.6366  | 0.6694  | -0.6529 | 0.6818  | 0.6257  |
| Mpnet   | 0.7938  | 0.8150  | 1.0000  | 0.6531  | 0.5580  | 0.5988  | 0.5988  | 0.6383  | -0.6337 | 0.6377  | 0.6001  |
| Roberta | 0.7238  | 0.6163  | 0.6531  | 1.0000  | 0.4195  | 0.4367  | 0.4367  | 0.5109  | -0.5119 | 0.4681  | 0.4466  |
| Leven   | 0.5809  | 0.5783  | 0.5580  | 0.4195  | 1.0000  | 0.7105  | 0.7105  | 0.6629  | -0.7978 | 0.7673  | 0.7436  |
| Jaccard | 0.6186  | 0.6366  | 0.5988  | 0.4367  | 0.7105  | 1.0000  | 1.0000  | 0.9329  | -0.8817 | 0.8547  | 0.8847  |
| Dice    | 0.6186  | 0.6366  | 0.5988  | 0.4367  | 0.7105  | 1.0000  | 1.0000  | 0.9329  | -0.8817 | 0.8547  | 0.8847  |
| Cosine  | 0.6851  | 0.6694  | 0.6383  | 0.5109  | 0.6629  | 0.9329  | 0.9329  | 1.0000  | -0.8618 | 0.8111  | 0.8616  |
| TER     | -0.6618 | -0.6529 | -0.6337 | -0.5119 | -0.7978 | -0.8817 | -0.8817 | -0.8618 | 1.0000  | -0.7523 | -0.8686 |
| CHRF    | 0.6951  | 0.6818  | 0.6377  | 0.4681  | 0.7673  | 0.8547  | 0.8547  | 0.8111  | -0.7523 | 1.0000  | 0.8332  |
| BLEU    | 0.6353  | 0.6257  | 0.6001  | 0.4466  | 0.7436  | 0.8847  | 0.8847  | 0.8616  | -0.8686 | 0.8332  | 1.0000  |

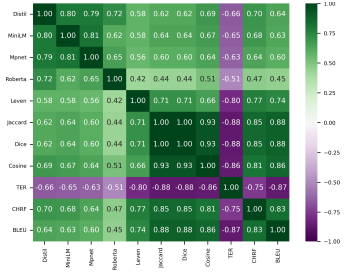

| ZhoSlk  | Distil  | MiniLM  | Mpnet   | Roberta | Leven   | Jaccard | Dice    | Cosine  | TER     | CHRF    | BLEU    |
|---------|---------|---------|---------|---------|---------|---------|---------|---------|---------|---------|---------|
| Distil  | 1.0000  | 0.7574  | 0.7678  | 0.7251  | 0.5641  | 0.5784  | 0.5784  | 0.5844  | -0.5556 | 0.7088  | 0.5389  |
| MiniLM  | 0.7574  | 1.0000  | 0.8546  | 0.6995  | 0.5944  | 0.6657  | 0.6657  | 0.6667  | -0.6216 | 0.7814  | 0.6143  |
| Mpnet   | 0.7678  | 0.8546  | 1.0000  | 0.6965  | 0.5513  | 0.5865  | 0.5865  | 0.5928  | -0.5561 | 0.7215  | 0.5490  |
| Roberta | 0.7251  | 0.6995  | 0.6965  | 1.0000  | 0.4948  | 0.5089  | 0.5089  | 0.5273  | -0.4869 | 0.6630  | 0.4846  |
| Leven   | 0.5641  | 0.5944  | 0.5513  | 0.4948  | 1.0000  | 0.6554  | 0.6554  | 0.6273  | -0.7784 | 0.7422  | 0.6859  |
| Jaccard | 0.5784  | 0.6657  | 0.5865  | 0.5089  | 0.6554  | 1.0000  | 1.0000  | 0.9485  | -0.8794 | 0.7961  | 0.8618  |
| Dice    | 0.5784  | 0.6657  | 0.5865  | 0.5089  | 0.6554  | 1.0000  | 1.0000  | 0.9485  | -0.8794 | 0.7961  | 0.8618  |
| Cosine  | 0.5844  | 0.6667  | 0.5928  | 0.5273  | 0.6273  | 0.9485  | 0.9485  | 1.0000  | -0.8560 | 0.7769  | 0.8545  |
| TER     | -0.5556 | -0.6216 | -0.5561 | -0.4869 | -0.7784 | -0.8794 | -0.8794 | -0.8560 | 1.0000  | -0.7305 | -0.8563 |
| CHRF    | 0.7088  | 0.7814  | 0.7215  | 0.6630  | 0.7422  | 0.7961  | 0.7961  | 0.7769  | -0.7305 | 1.0000  | 0.7762  |
| BLEU    | 0.5389  | 0.6143  | 0.5490  | 0.4846  | 0.6859  | 0.8618  | 0.8618  | 0.8545  | -0.8563 | 0.7762  | 1.0000  |

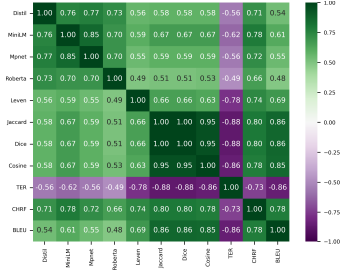

| ZhoSpa  | Distil  | MiniLM  | Mpnet   | Roberta | Leven   | Jaccard | Dice    | Cosine  | TER     | CHRF    | BLEU    |
|---------|---------|---------|---------|---------|---------|---------|---------|---------|---------|---------|---------|
| Distil  | 1.0000  | 0.7872  | 0.7775  | 0.6515  | 0.5644  | 0.6655  | 0.6655  | 0.6344  | -0.6356 | 0.7205  | 0.6287  |
| MiniLM  | 0.7872  | 1.0000  | 0.8259  | 0.6219  | 0.5380  | 0.6506  | 0.6506  | 0.6203  | -0.6142 | 0.6956  | 0.6068  |
| Mpnet   | 0.7775  | 0.8259  | 1.0000  | 0.6084  | 0.5334  | 0.6081  | 0.6081  | 0.5641  | -0.5866 | 0.6557  | 0.5651  |
| Roberta | 0.6515  | 0.6219  | 0.6084  | 1.0000  | 0.5179  | 0.6225  | 0.6225  | 0.5957  | -0.5844 | 0.6553  | 0.5646  |
| Leven   | 0.5644  | 0.5380  | 0.5334  | 0.5179  | 1.0000  | 0.6694  | 0.6694  | 0.5919  | -0.8242 | 0.7444  | 0.7141  |
| Jaccard | 0.6655  | 0.6506  | 0.6081  | 0.6225  | 0.6694  | 1.0000  | 1.0000  | 0.8733  | -0.8804 | 0.8630  | 0.8578  |
| Dice    | 0.6655  | 0.6506  | 0.6081  | 0.6225  | 0.6694  | 1.0000  | 1.0000  | 0.8733  | -0.8804 | 0.8630  | 0.8578  |
| Cosine  | 0.6344  | 0.6203  | 0.5641  | 0.5957  | 0.5919  | 0.8733  | 0.8733  | 1.0000  | -0.8222 | 0.8013  | 0.8397  |
| TER     | -0.6356 | -0.6142 | -0.5866 | -0.5844 | -0.8242 | -0.8804 | -0.8804 | -0.8222 | 1.0000  | -0.8087 | -0.8782 |
| CHRF    | 0.7205  | 0.6956  | 0.6557  | 0.6553  | 0.7444  | 0.8630  | 0.8630  | 0.8013  | -0.8087 | 1.0000  | 0.8465  |
| BLEU    | 0.6287  | 0.6068  | 0.5651  | 0.5646  | 0.7141  | 0.8578  | 0.8578  | 0.8397  | -0.8782 | 0.8465  | 1.0000  |

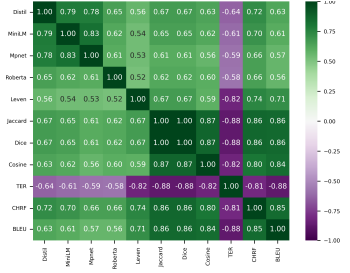

| ZhoTha  | Distil  | MiniLM  | Mpnet   | Roberta | Leven   | Jaccard | Dice    | Cosine  | TER     | CHRF    | BLEU    |
|---------|---------|---------|---------|---------|---------|---------|---------|---------|---------|---------|---------|
| Distil  | 1.0000  | 0.5215  | 0.5233  | 0.5121  | 0.5159  | 0.5565  | 0.5565  | 0.5692  | -0.6206 | 0.5581  | 0.5693  |
| MiniLM  | 0.5215  | 1.0000  | 0.7884  | 0.5035  | 0.5076  | 0.6193  | 0.6193  | 0.6493  | -0.6131 | 0.5842  | 0.5909  |
| Mpnet   | 0.5233  | 0.7884  | 1.0000  | 0.5233  | 0.4827  | 0.5501  | 0.5501  | 0.5745  | -0.5661 | 0.5208  | 0.5346  |
| Roberta | 0.5121  | 0.5035  | 0.5233  | 1.0000  | 0.4516  | 0.5488  | 0.5488  | 0.5738  | -0.5235 | 0.5451  | 0.5212  |
| Leven   | 0.5159  | 0.5076  | 0.4827  | 0.4516  | 1.0000  | 0.7039  | 0.7039  | 0.6843  | -0.8275 | 0.7733  | 0.7715  |
| Jaccard | 0.5565  | 0.6193  | 0.5501  | 0.5488  | 0.7039  | 1.0000  | 1.0000  | 0.9190  | -0.8794 | 0.8754  | 0.8545  |
| Dice    | 0.5565  | 0.6193  | 0.5501  | 0.5488  | 0.7039  | 1.0000  | 1.0000  | 0.9190  | -0.8794 | 0.8754  | 0.8545  |
| Cosine  | 0.5692  | 0.6493  | 0.5745  | 0.5738  | 0.6843  | 0.9190  | 0.9190  | 1.0000  | -0.8513 | 0.8695  | 0.8452  |
| TER     | -0.6206 | -0.6131 | -0.5661 | -0.5235 | -0.8275 | -0.8794 | -0.8794 | -0.8513 | 1.0000  | -0.8130 | -0.8694 |
| CHRF    | 0.5581  | 0.5842  | 0.5208  | 0.5451  | 0.7733  | 0.8754  | 0.8754  | 0.8695  | -0.8130 | 1.0000  | 0.9118  |
| BLEU    | 0.5693  | 0.5909  | 0.5346  | 0.5212  | 0.7715  | 0.8545  | 0.8545  | 0.8452  | -0.8694 | 0.9118  | 1.0000  |

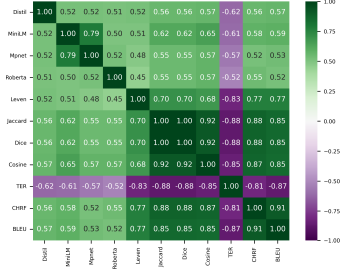

| ZhoUkr  | Distil  | MiniLM  | Mpnet   | Roberta | Leven   | Jaccard | Dice    | Cosine  | TER     | CHRF    | BLEU    |
|---------|---------|---------|---------|---------|---------|---------|---------|---------|---------|---------|---------|
| Distil  | 1.0000  | 0.7463  | 0.7905  | 0.7046  | 0.5492  | 0.5580  | 0.5580  | 0.5951  | -0.5932 | 0.6422  | 0.5513  |
| MiniLM  | 0.7463  | 1.0000  | 0.7886  | 0.6210  | 0.5303  | 0.5599  | 0.5599  | 0.5734  | -0.5830 | 0.5895  | 0.5334  |
| Mpnet   | 0.7905  | 0.7886  | 1.0000  | 0.7127  | 0.5080  | 0.5306  | 0.5306  | 0.5655  | -0.5678 | 0.5669  | 0.5198  |
| Roberta | 0.7046  | 0.6210  | 0.7127  | 1.0000  | 0.4434  | 0.4291  | 0.4291  | 0.4744  | -0.4947 | 0.4832  | 0.4246  |
| Leven   | 0.5492  | 0.5303  | 0.5080  | 0.4434  | 1.0000  | 0.6822  | 0.6822  | 0.6439  | -0.7637 | 0.7566  | 0.7079  |
| Jaccard | 0.5580  | 0.5599  | 0.5306  | 0.4291  | 0.6822  | 1.0000  | 1.0000  | 0.9412  | -0.8538 | 0.7840  | 0.8579  |
| Dice    | 0.5580  | 0.5599  | 0.5306  | 0.4291  | 0.6822  | 1.0000  | 1.0000  | 0.9412  | -0.8538 | 0.7840  | 0.8579  |
| Cosine  | 0.5951  | 0.5734  | 0.5655  | 0.4744  | 0.6439  | 0.9412  | 0.9412  | 1.0000  | -0.8388 | 0.7430  | 0.8388  |
| TER     | -0.5932 | -0.5830 | -0.5678 | -0.4947 | -0.7637 | -0.8538 | -0.8538 | -0.8388 | 1.0000  | -0.6625 | -0.8386 |
| CHRF    | 0.6422  | 0.5895  | 0.5669  | 0.4832  | 0.7566  | 0.7840  | 0.7840  | 0.7430  | -0.6625 | 1.0000  | 0.7585  |
| BLEU    | 0.5513  | 0.5334  | 0.5198  | 0.4246  | 0.7079  | 0.8579  | 0.8579  | 0.8388  | -0.8386 | 0.7585  | 1.0000  |

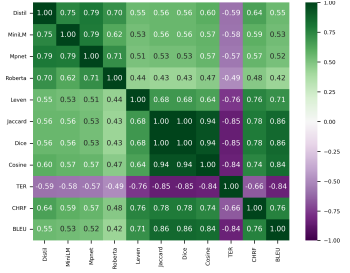

| ZhoVie  | Distil  | MiniLM  | Mpnet   | Roberta | Leven   | Jaccard | Dice    | Cosine  | TER     | CHRF    | BLEU    |
|---------|---------|---------|---------|---------|---------|---------|---------|---------|---------|---------|---------|
| Distil  | 1.0000  | 0.7793  | 0.7984  | 0.8041  | 0.5632  | 0.7122  | 0.7122  | 0.7482  | -0.7061 | 0.6591  | 0.6812  |
| MiniLM  | 0.7793  | 1.0000  | 0.8209  | 0.6546  | 0.6241  | 0.8035  | 0.8035  | 0.8115  | -0.7431 | 0.7695  | 0.7391  |
| Mpnet   | 0.7984  | 0.8209  | 1.0000  | 0.7289  | 0.5279  | 0.6655  | 0.6655  | 0.6866  | -0.6510 | 0.6153  | 0.6224  |
| Roberta | 0.8041  | 0.6546  | 0.7289  | 1.0000  | 0.4811  | 0.6095  | 0.6095  | 0.6330  | -0.6119 | 0.5301  | 0.5650  |
| Leven   | 0.5632  | 0.6241  | 0.5279  | 0.4811  | 1.0000  | 0.7531  | 0.7531  | 0.7278  | -0.8612 | 0.8024  | 0.8087  |
| Jaccard | 0.7122  | 0.8035  | 0.6655  | 0.6095  | 0.7531  | 1.0000  | 1.0000  | 0.9484  | -0.8944 | 0.8986  | 0.8675  |
| Dice    | 0.7122  | 0.8035  | 0.6655  | 0.6095  | 0.7531  | 1.0000  | 1.0000  | 0.9484  | -0.8944 | 0.8986  | 0.8675  |
| Cosine  | 0.7482  | 0.8115  | 0.6866  | 0.6330  | 0.7278  | 0.9484  | 0.9484  | 1.0000  | -0.8857 | 0.8726  | 0.8619  |
| TER     | -0.7061 | -0.7431 | -0.6510 | -0.6119 | -0.8612 | -0.8944 | -0.8944 | -0.8857 | 1.0000  | -0.8271 | -0.8810 |
| CHRF    | 0.6591  | 0.7695  | 0.6153  | 0.5301  | 0.8024  | 0.8986  | 0.8986  | 0.8726  | -0.8271 | 1.0000  | 0.9222  |
| BLEU    | 0.6812  | 0.7391  | 0.6224  | 0.5650  | 0.8087  | 0.8675  | 0.8675  | 0.8619  | -0.8810 | 0.9222  | 1.0000  |

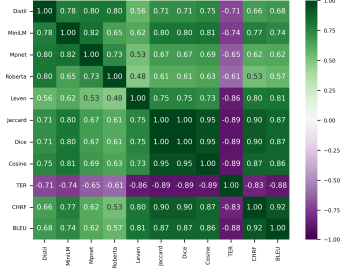

Supplement: supplementary_material [file attachment]
